# Supplementary material for: A conserved mechanism affecting hydride shifting and deprotonation in the synthesis of hopane triterpenes as compositions of wax in oat
Source: PubMed Central journal article supplement — Proc Natl Acad Sci U S A. 2022 Mar 15;119(12):e2118709119. doi: 10.1073/pnas.2118709119 (PMC8944845; doi:10.1073/pnas.2118709119), 2022-03-15

# Supplementary Data 1. Spectroscopic data of hopenol B generated by AsHS1

## EIMS

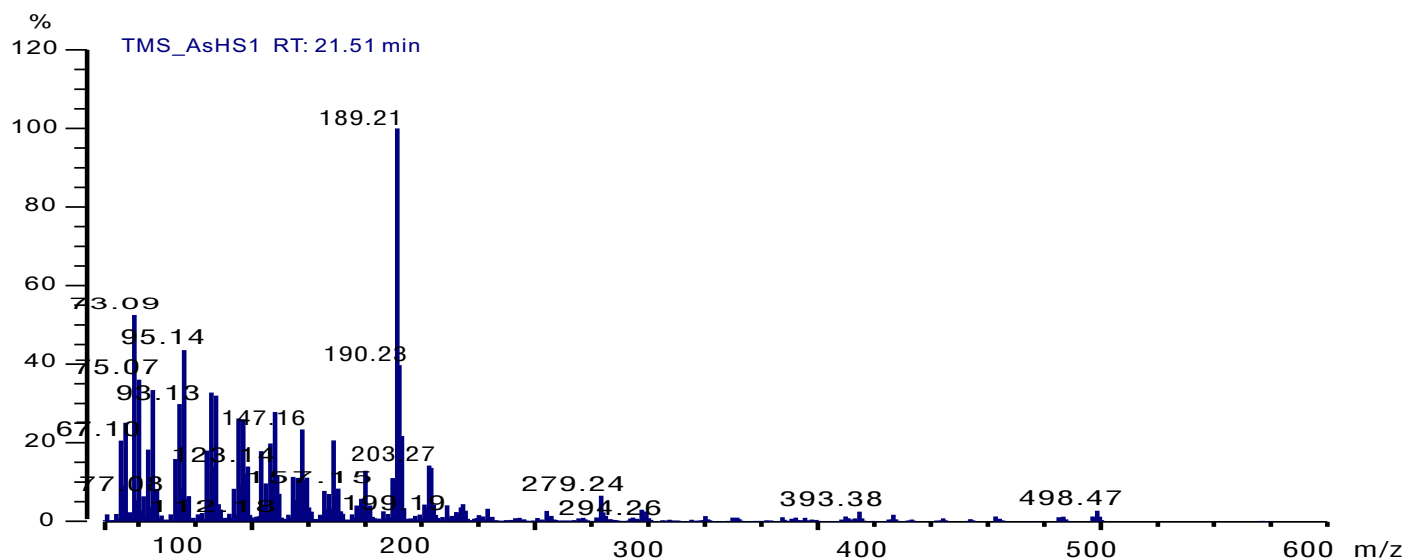

## NMR data

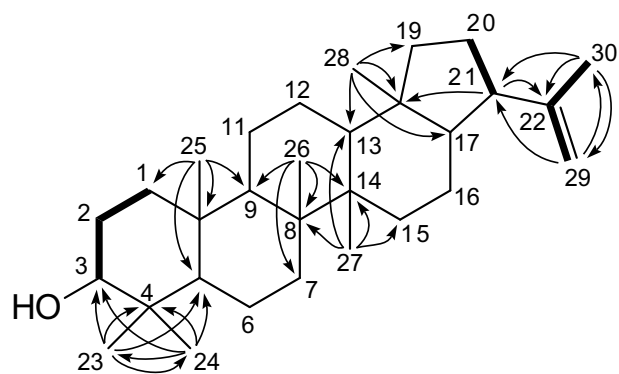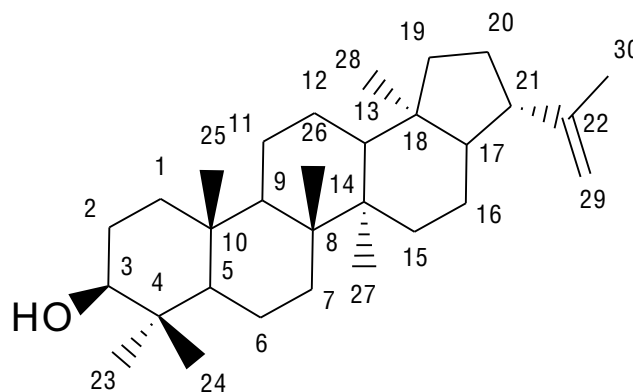

key HMBC (H→C) and <sup>1</sup>H-<sup>1</sup>H COSY  
(—)Correlations of hopenol B

hopenol B

| NO. | $\delta_H$          | $\delta_C$ | NO. | $\delta_H$     | $\delta_C$ | NO. | $\delta_H$   | $\delta_C$ |
|-----|---------------------|------------|-----|----------------|------------|-----|--------------|------------|
| 1   | 0.93 m, 1.70 m      | 39.0       | 11  | 1.47 m, 1.64 m | 21.8       | 21  | 2.68 q (9.1) | 46.6       |
| 2   | 1.33 m, 1.51 m      | 21.2       | 12  | 1.61 m, 1.79 m | 27.5       | 22  | /            | 148.9      |
| 3   | 3.19 dd (11.8, 4.2) | 79.2       | 13  | 1.36 m         | 49.6       | 23  | 0.97 s       | 28.2       |
| 4   | /                   | 38.9       | 14  | /              | 41.8       | 24  | 0.76 s       | 16.0       |
| 5   | 1.39 m              | 55.0       | 15  | 1.24 m, 1.39 m | 33.8       | 25  | 0.82 s       | 15.5       |
| 6   | 1.39 m, 1.52 m      | 18.5       | 16  | 1.41 m, 1.47 m | 24.1       | 26  | 0.96 s       | 16.9       |
| 7   | 1.24 m, 1.46 m      | 33.4       | 17  | 0.68 m         | 55.2       | 27  | 0.93 s       | 16.8       |
| 8   | /                   | 42.1       | 18  | /              | 44.9       | 28  | 0.72 s       | 16.2       |
| 9   | 1.22 m              | 50.5       | 19  | 1.02 m, 1.61 m | 42.2       | 29  | 4.78 br s    | 110.2      |
| 10  | /                   | 37.3       | 20  | 1.56 m, 1.86 m | 27.5       | 30  | 1.75 s       | 25.2       |

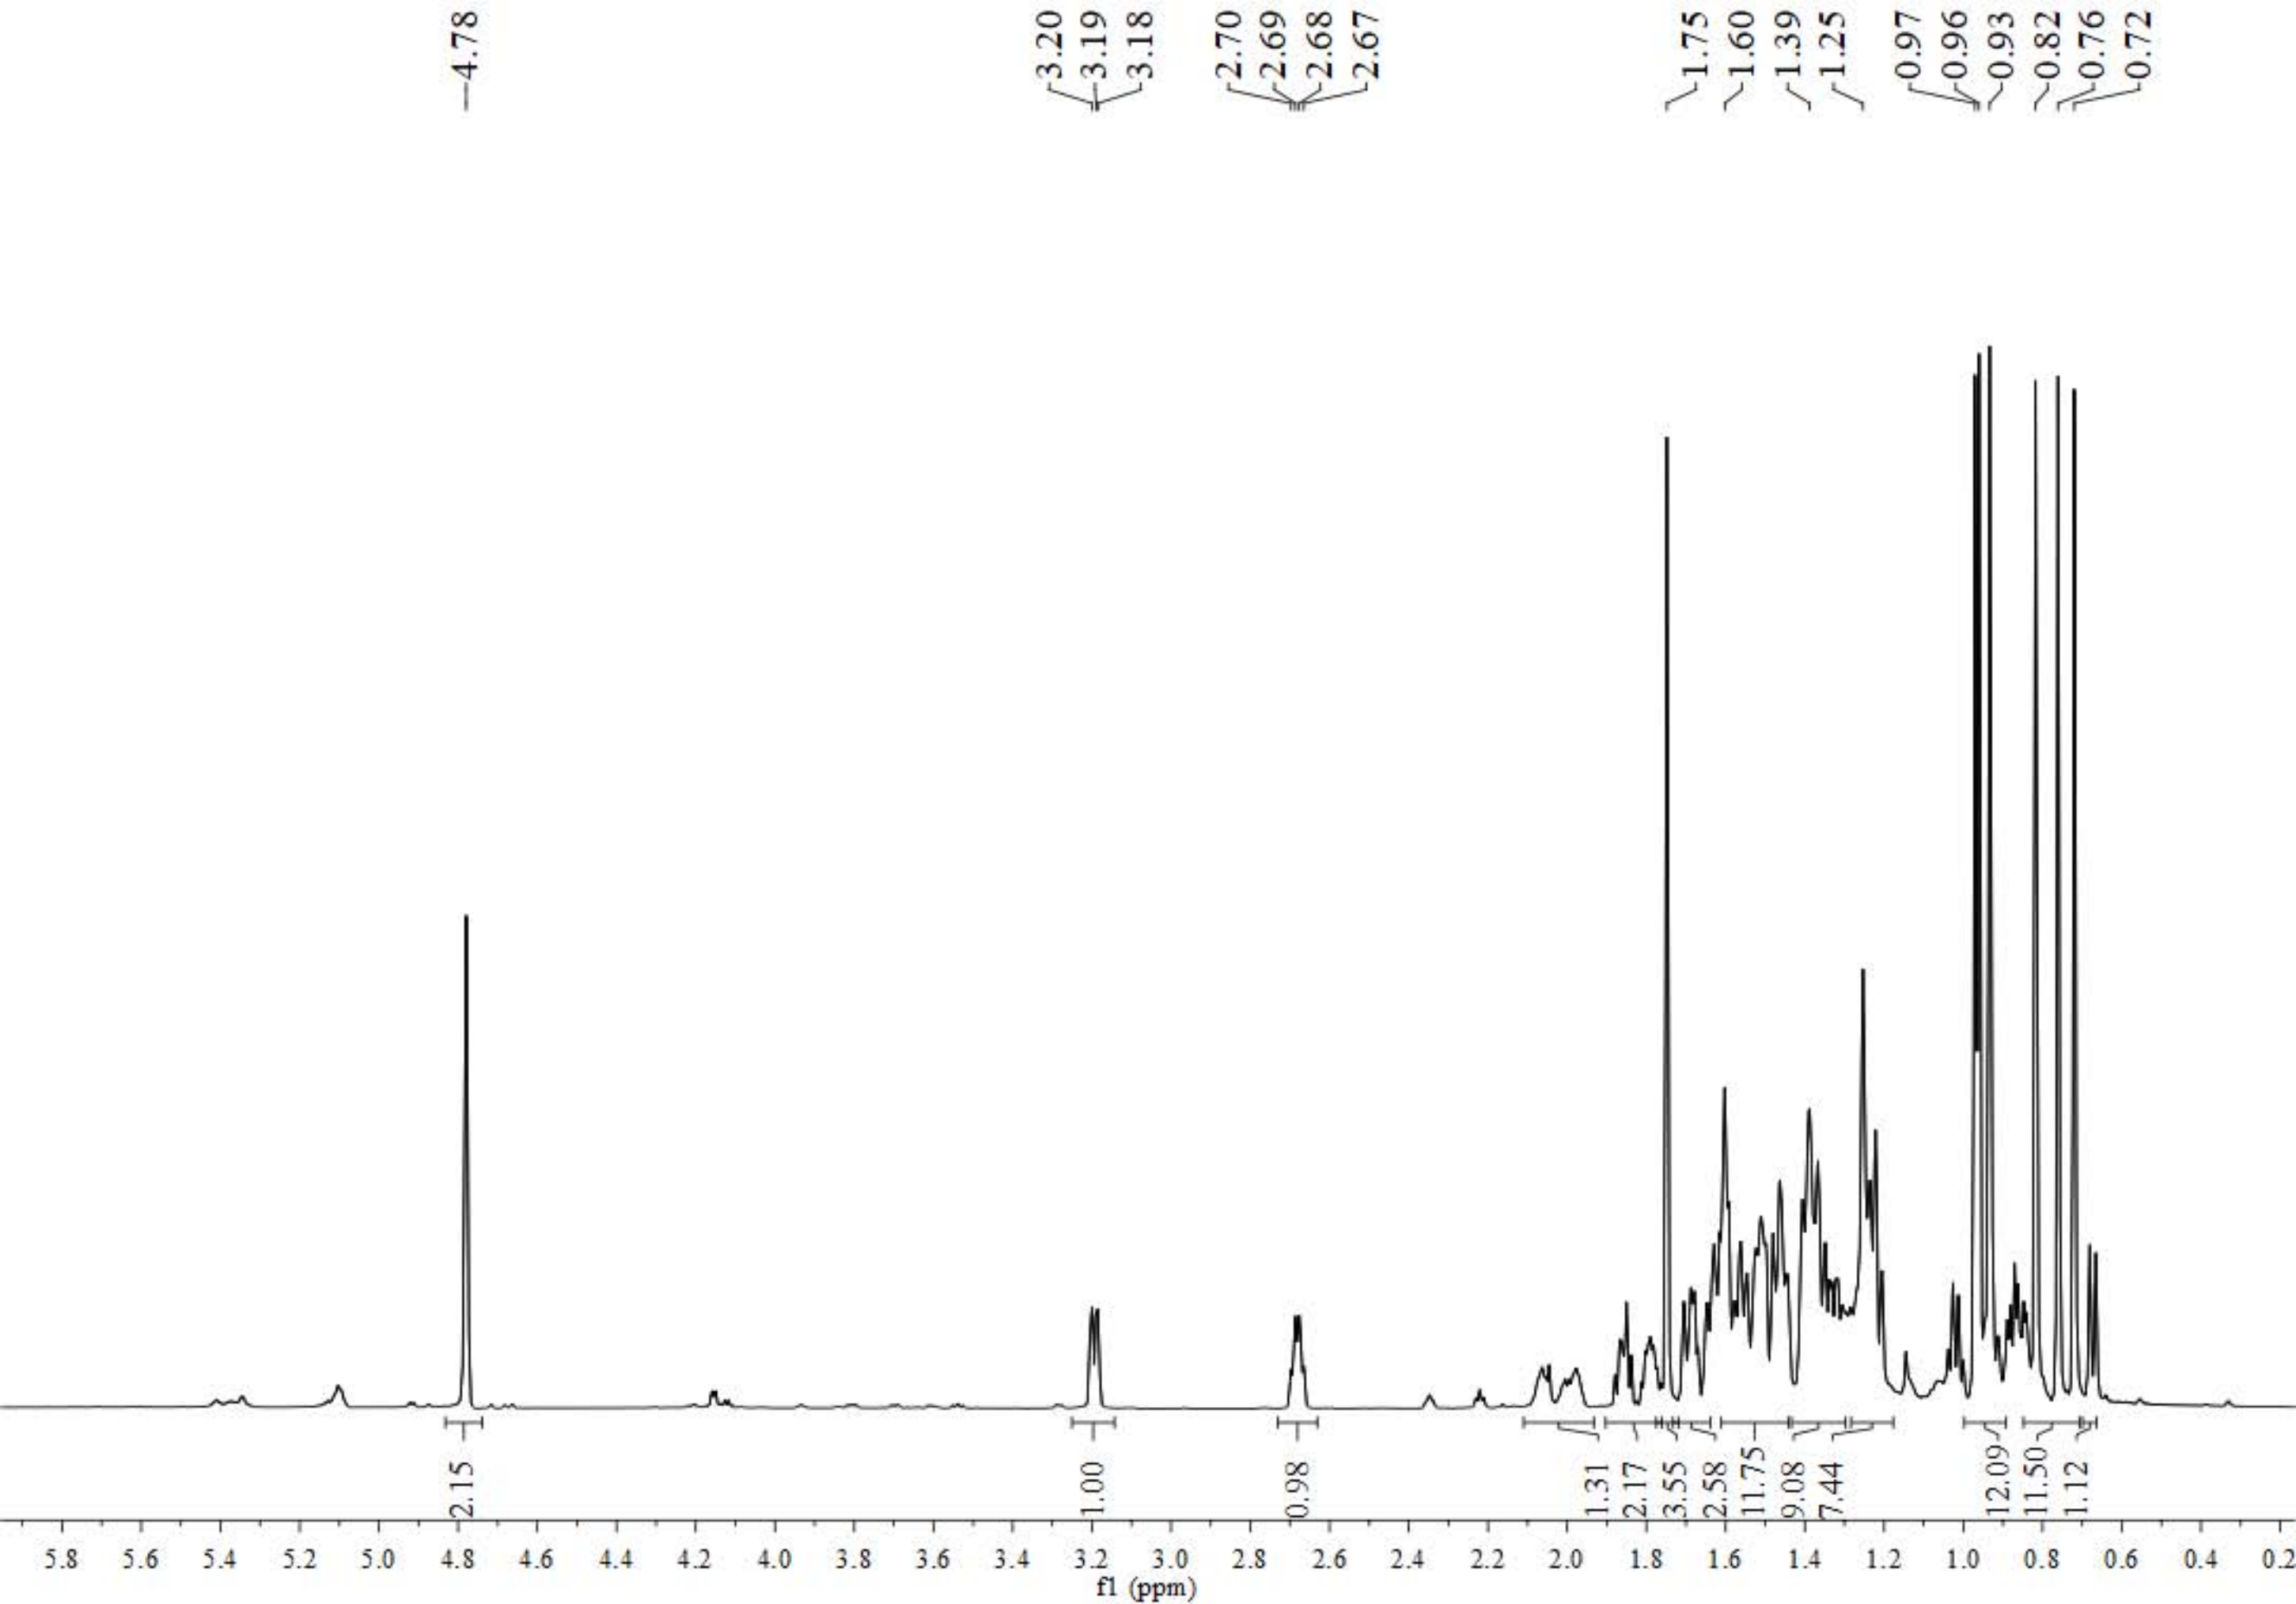

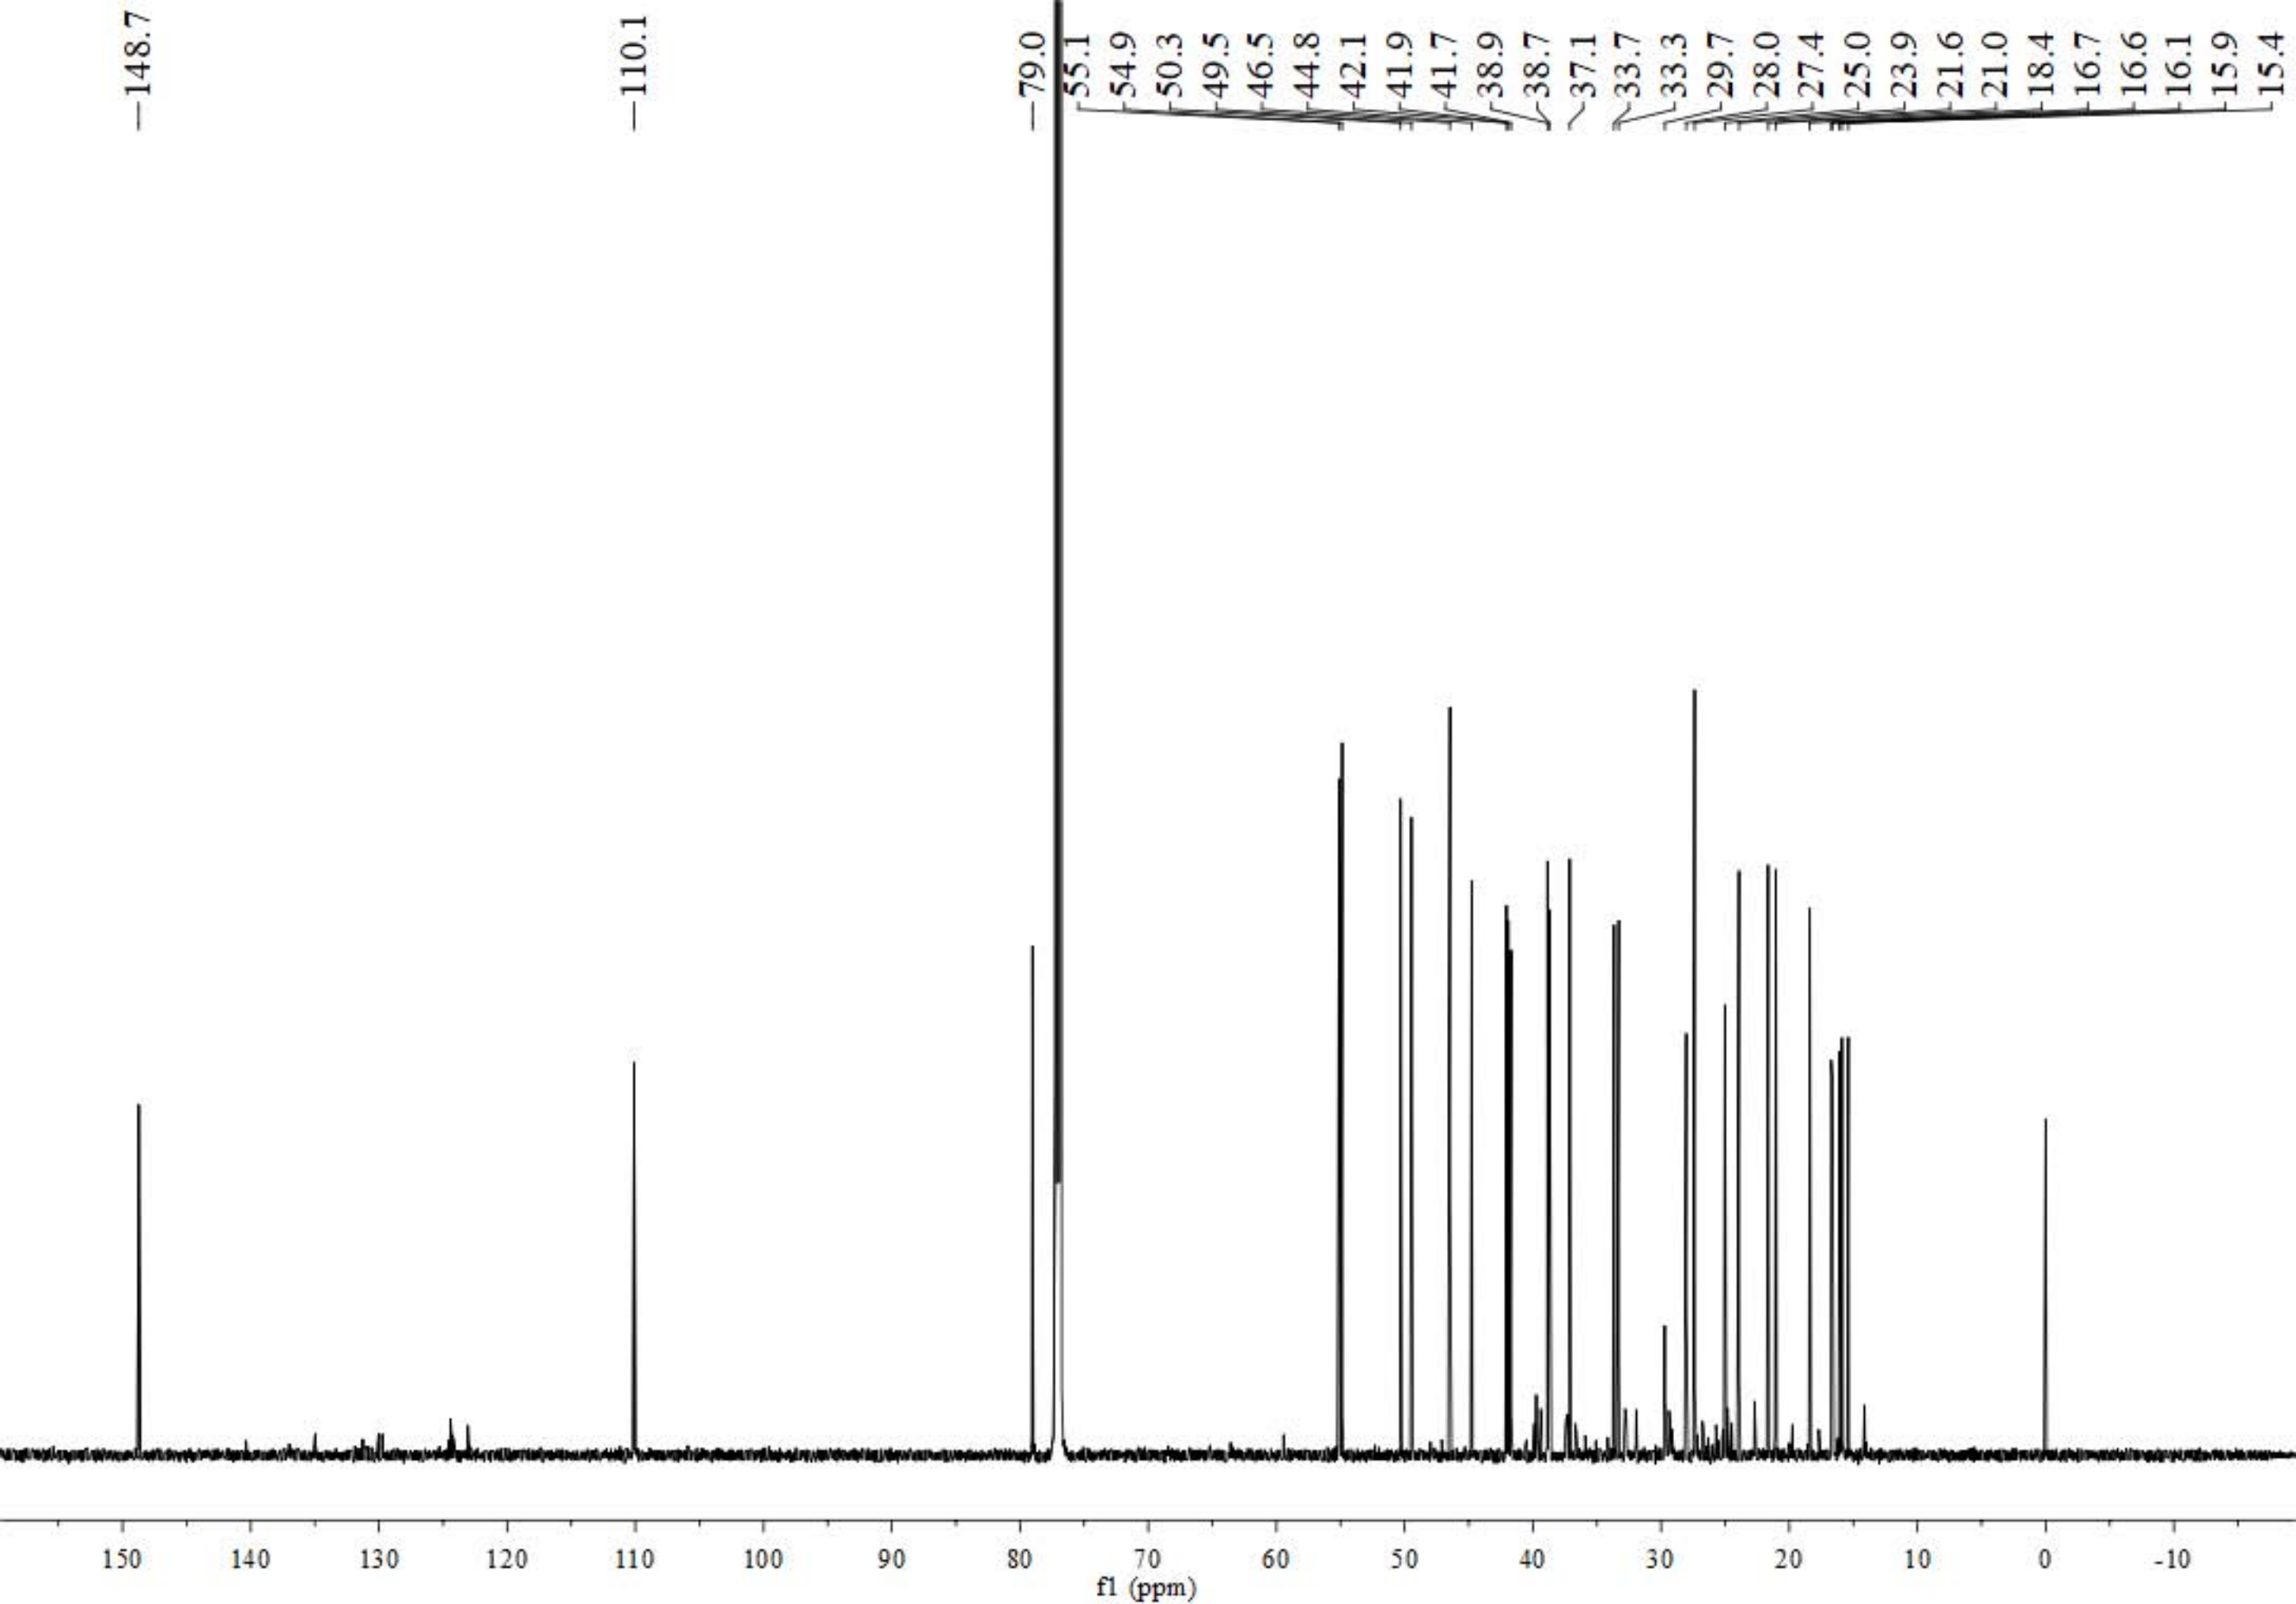

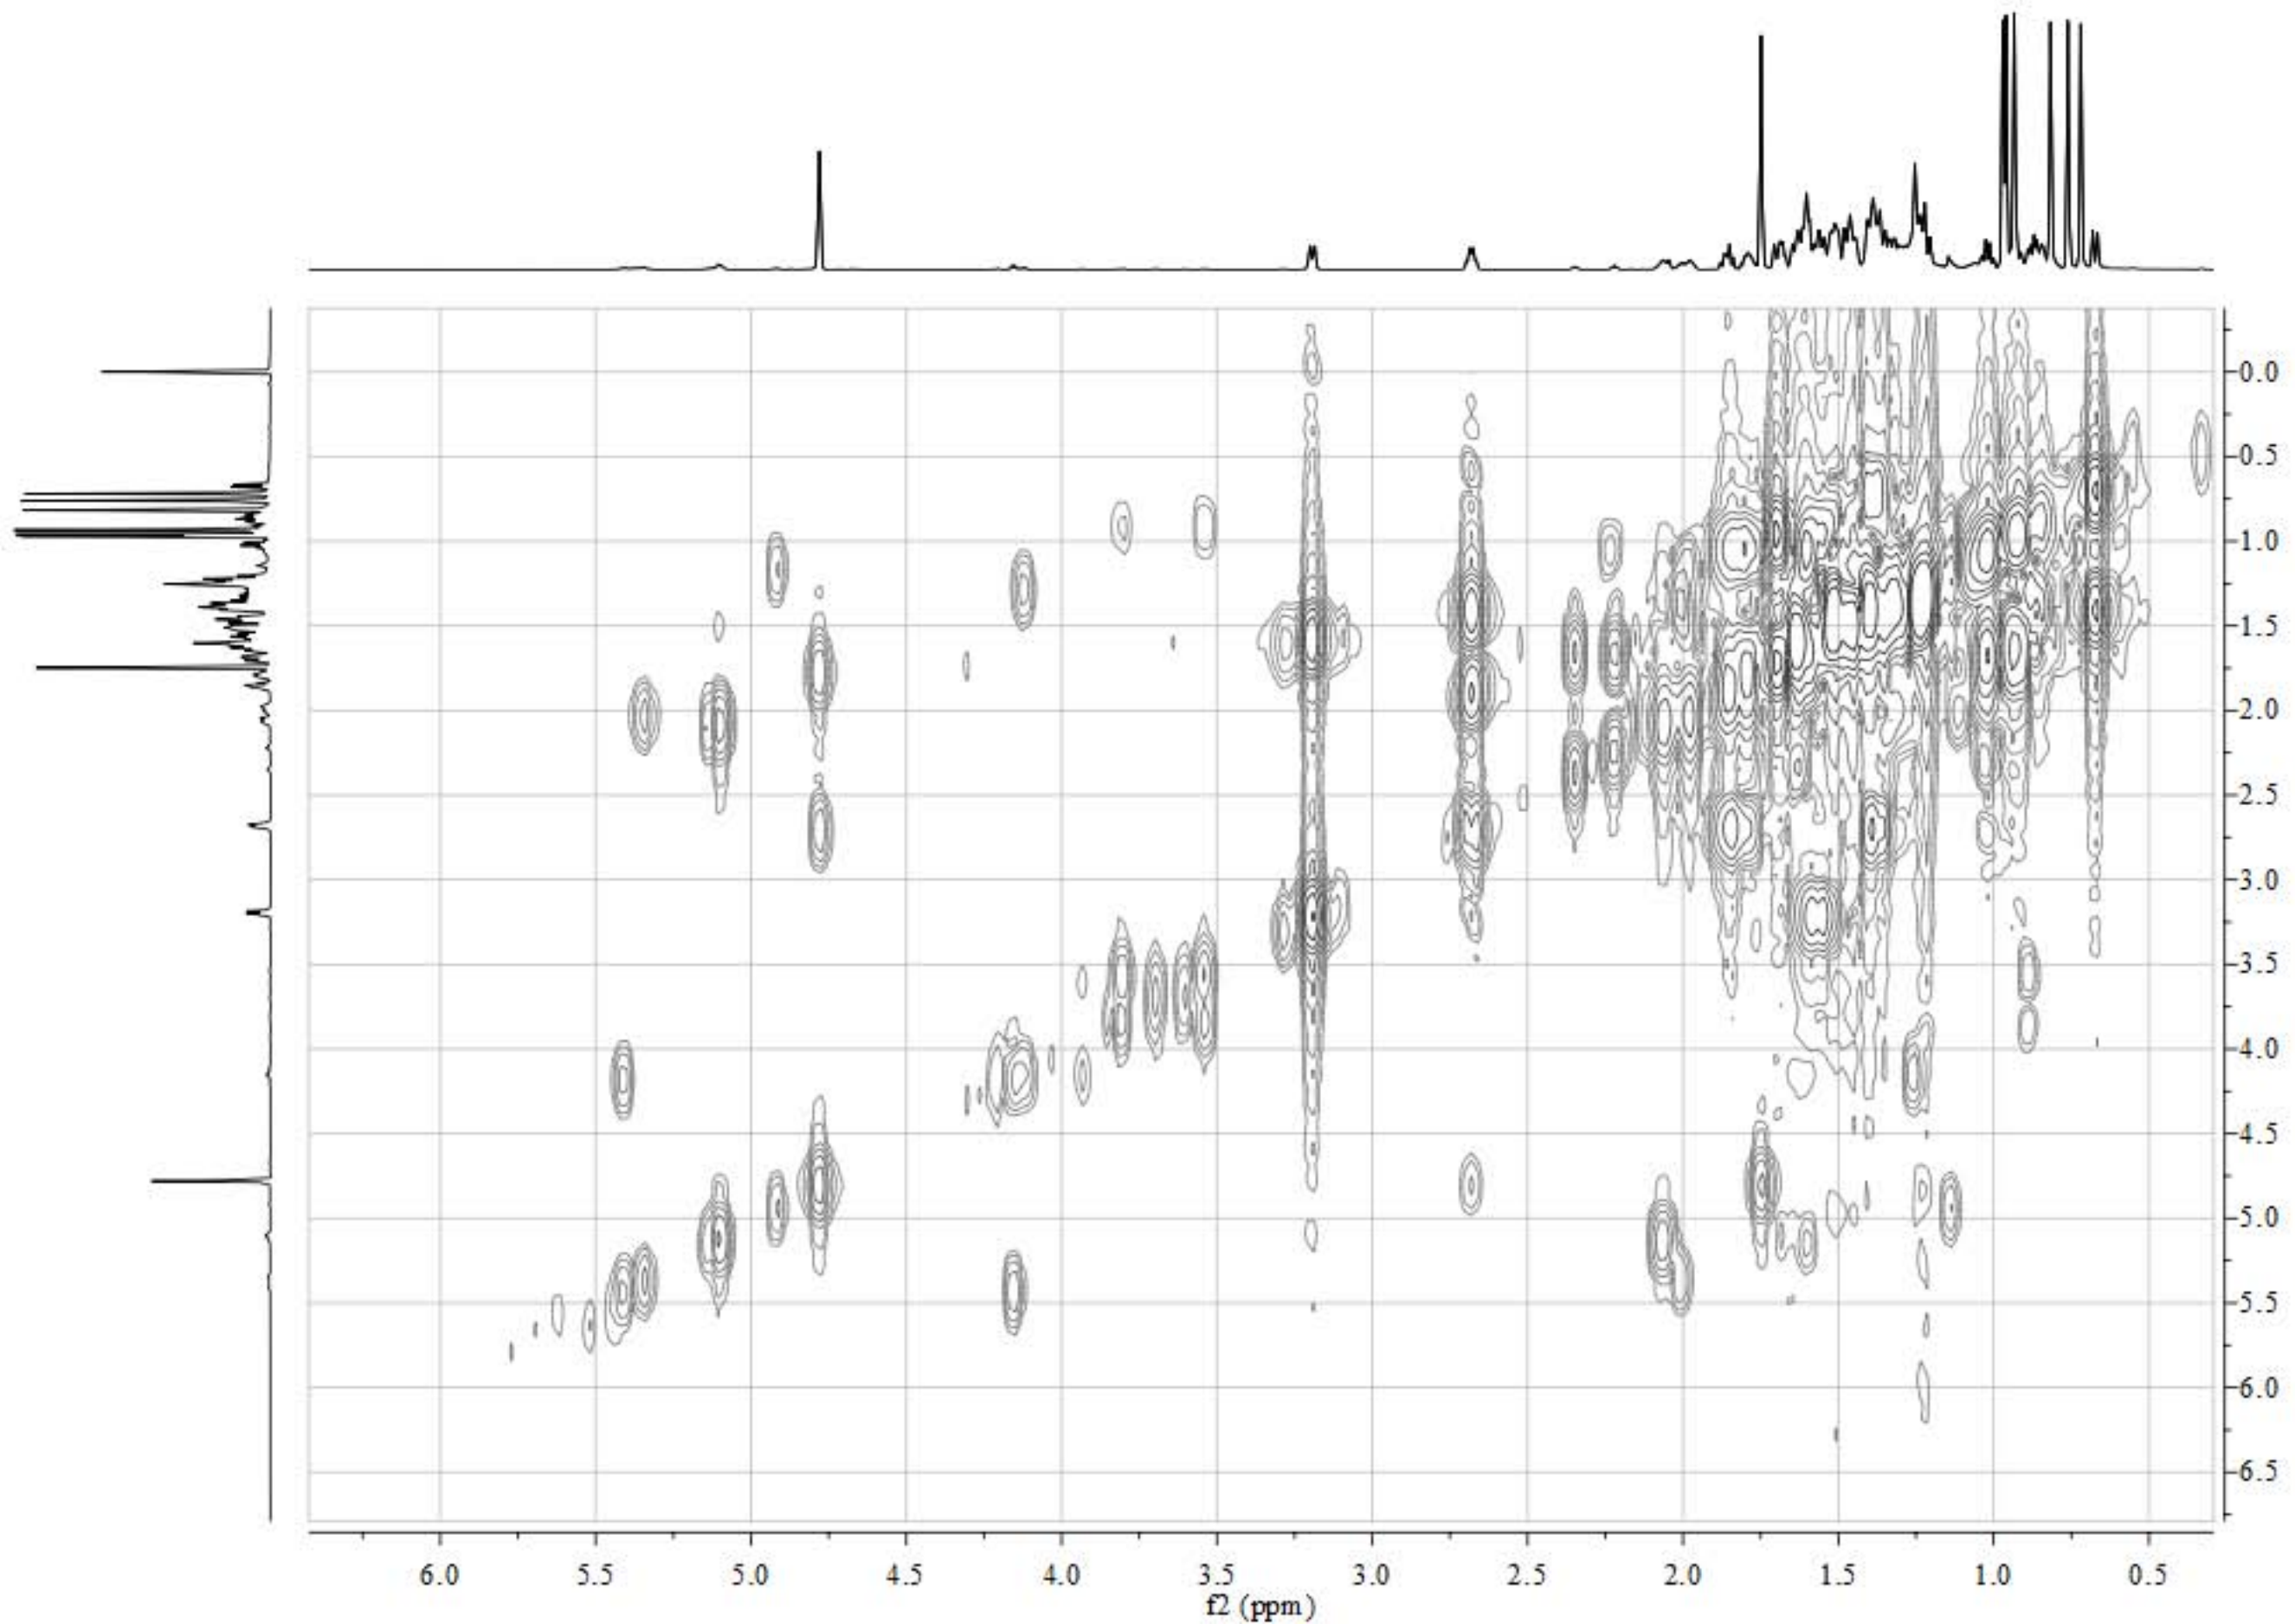

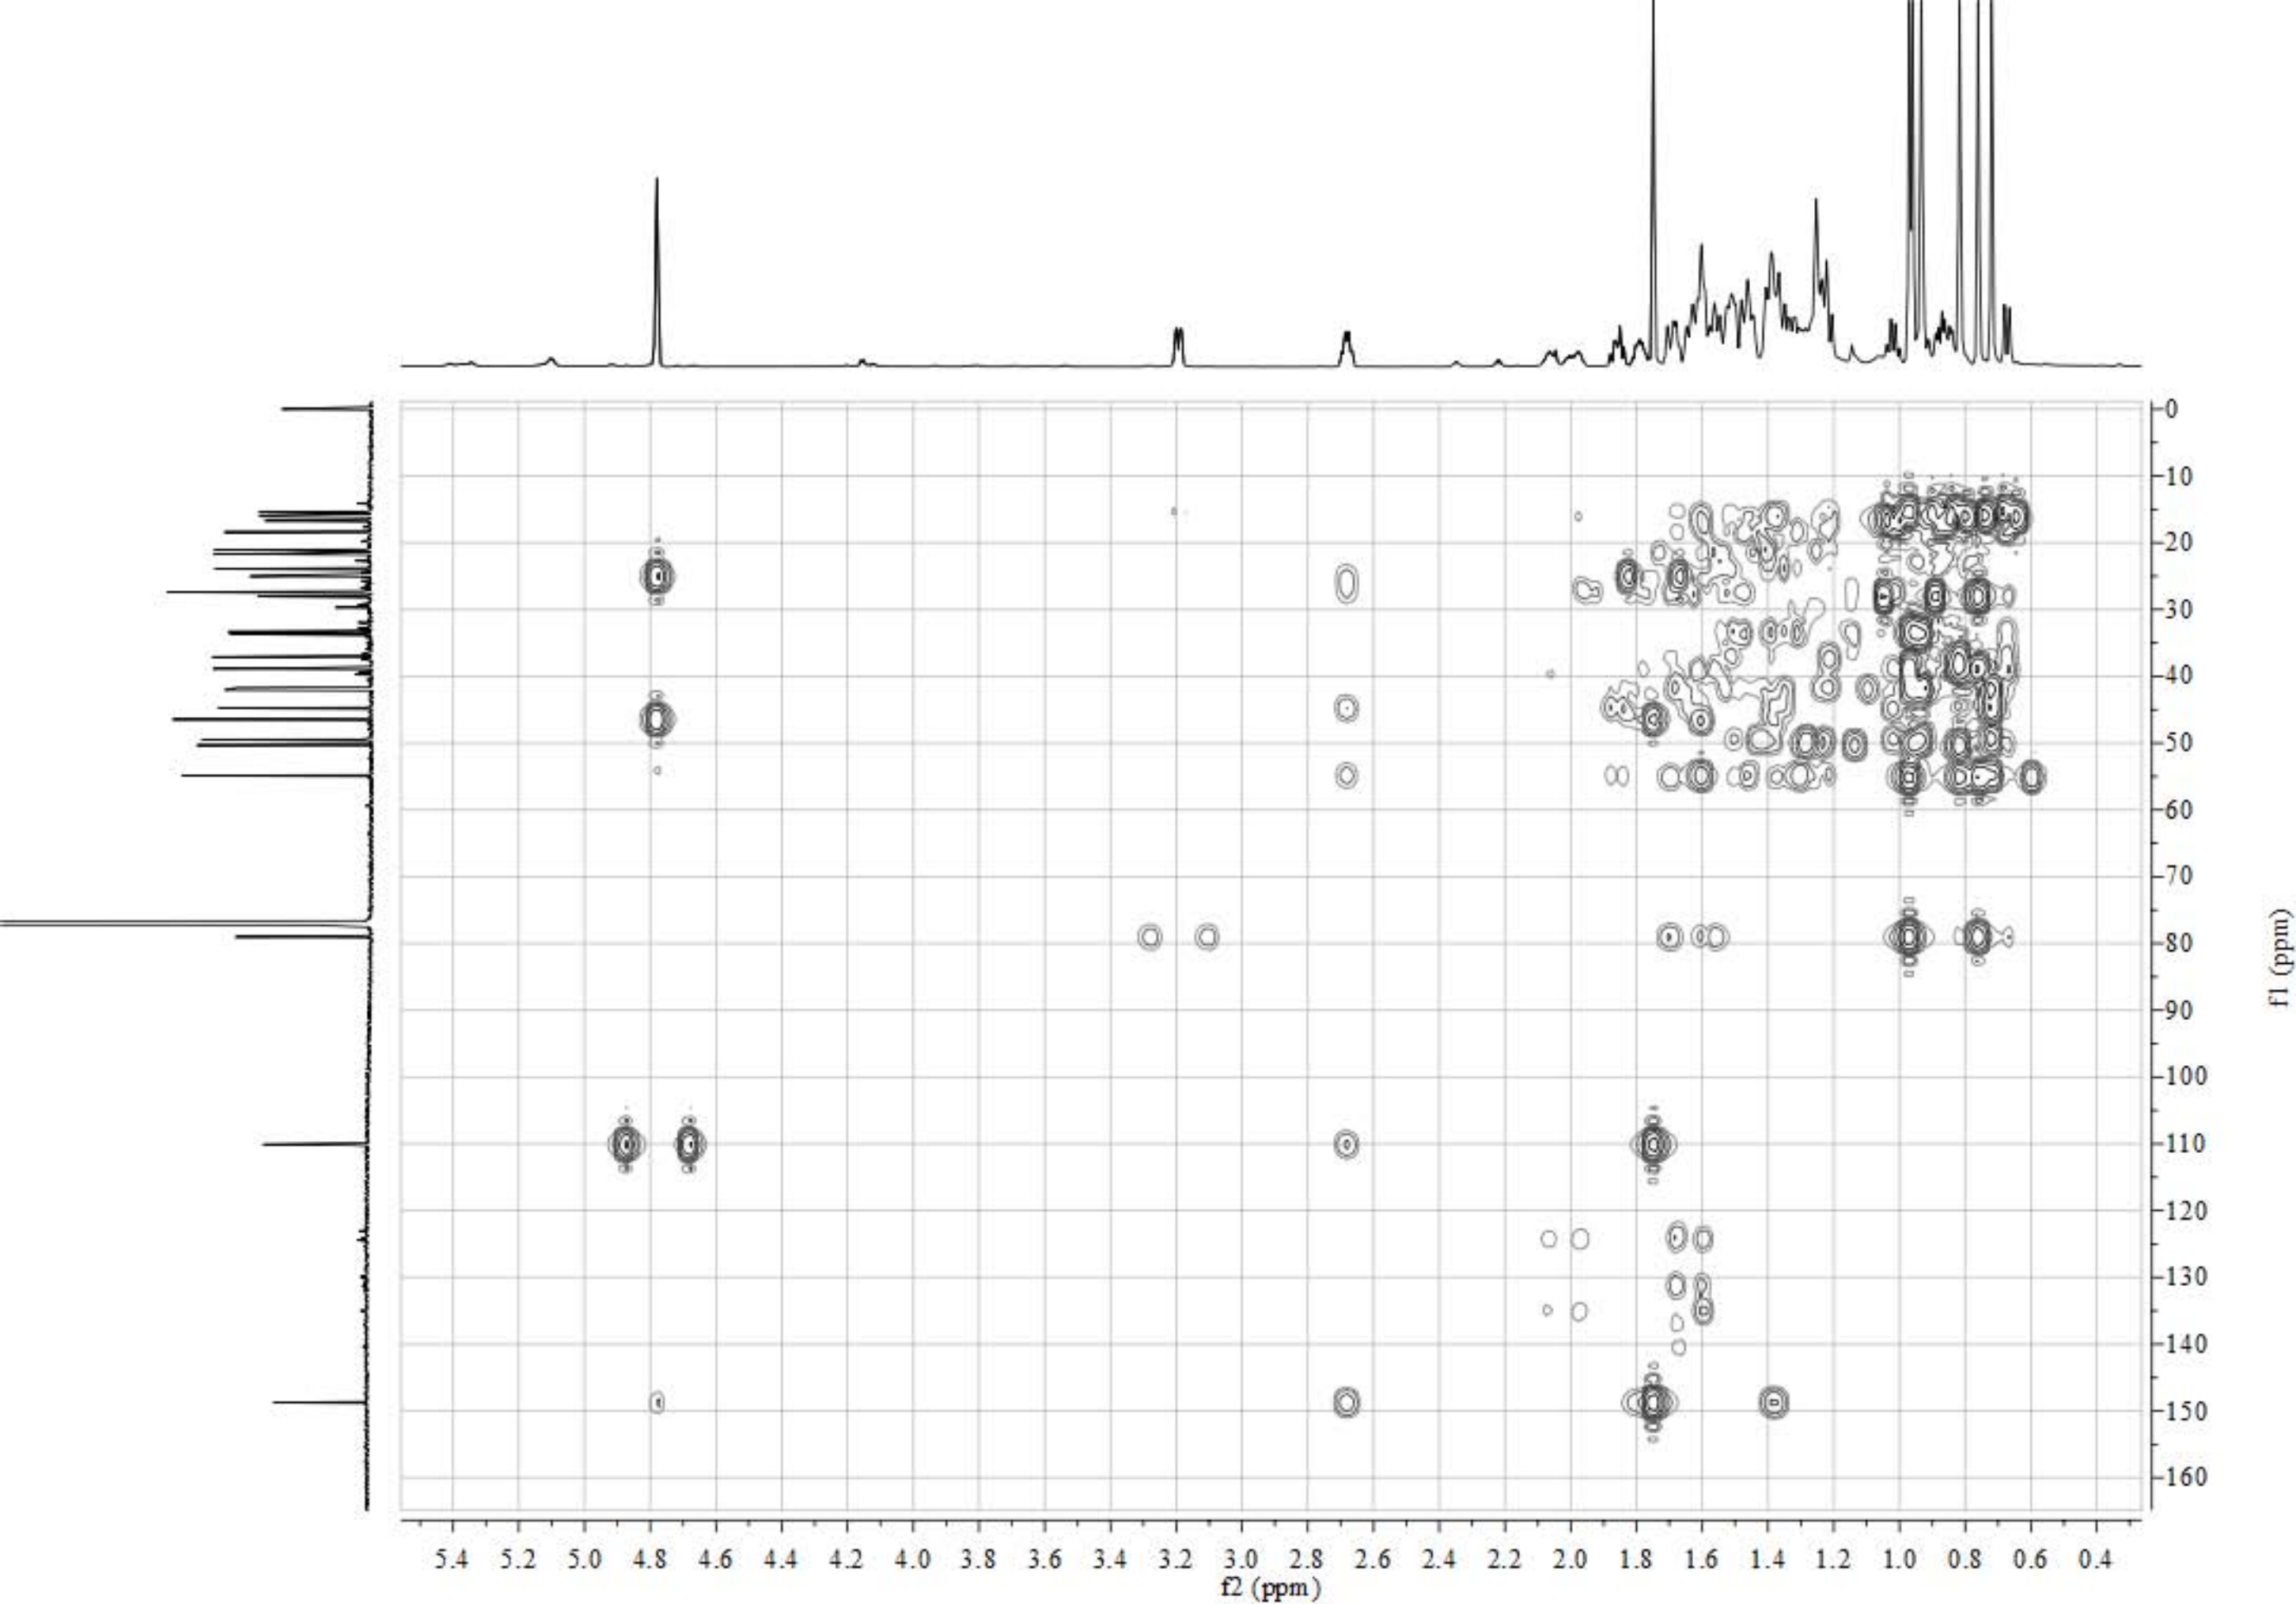



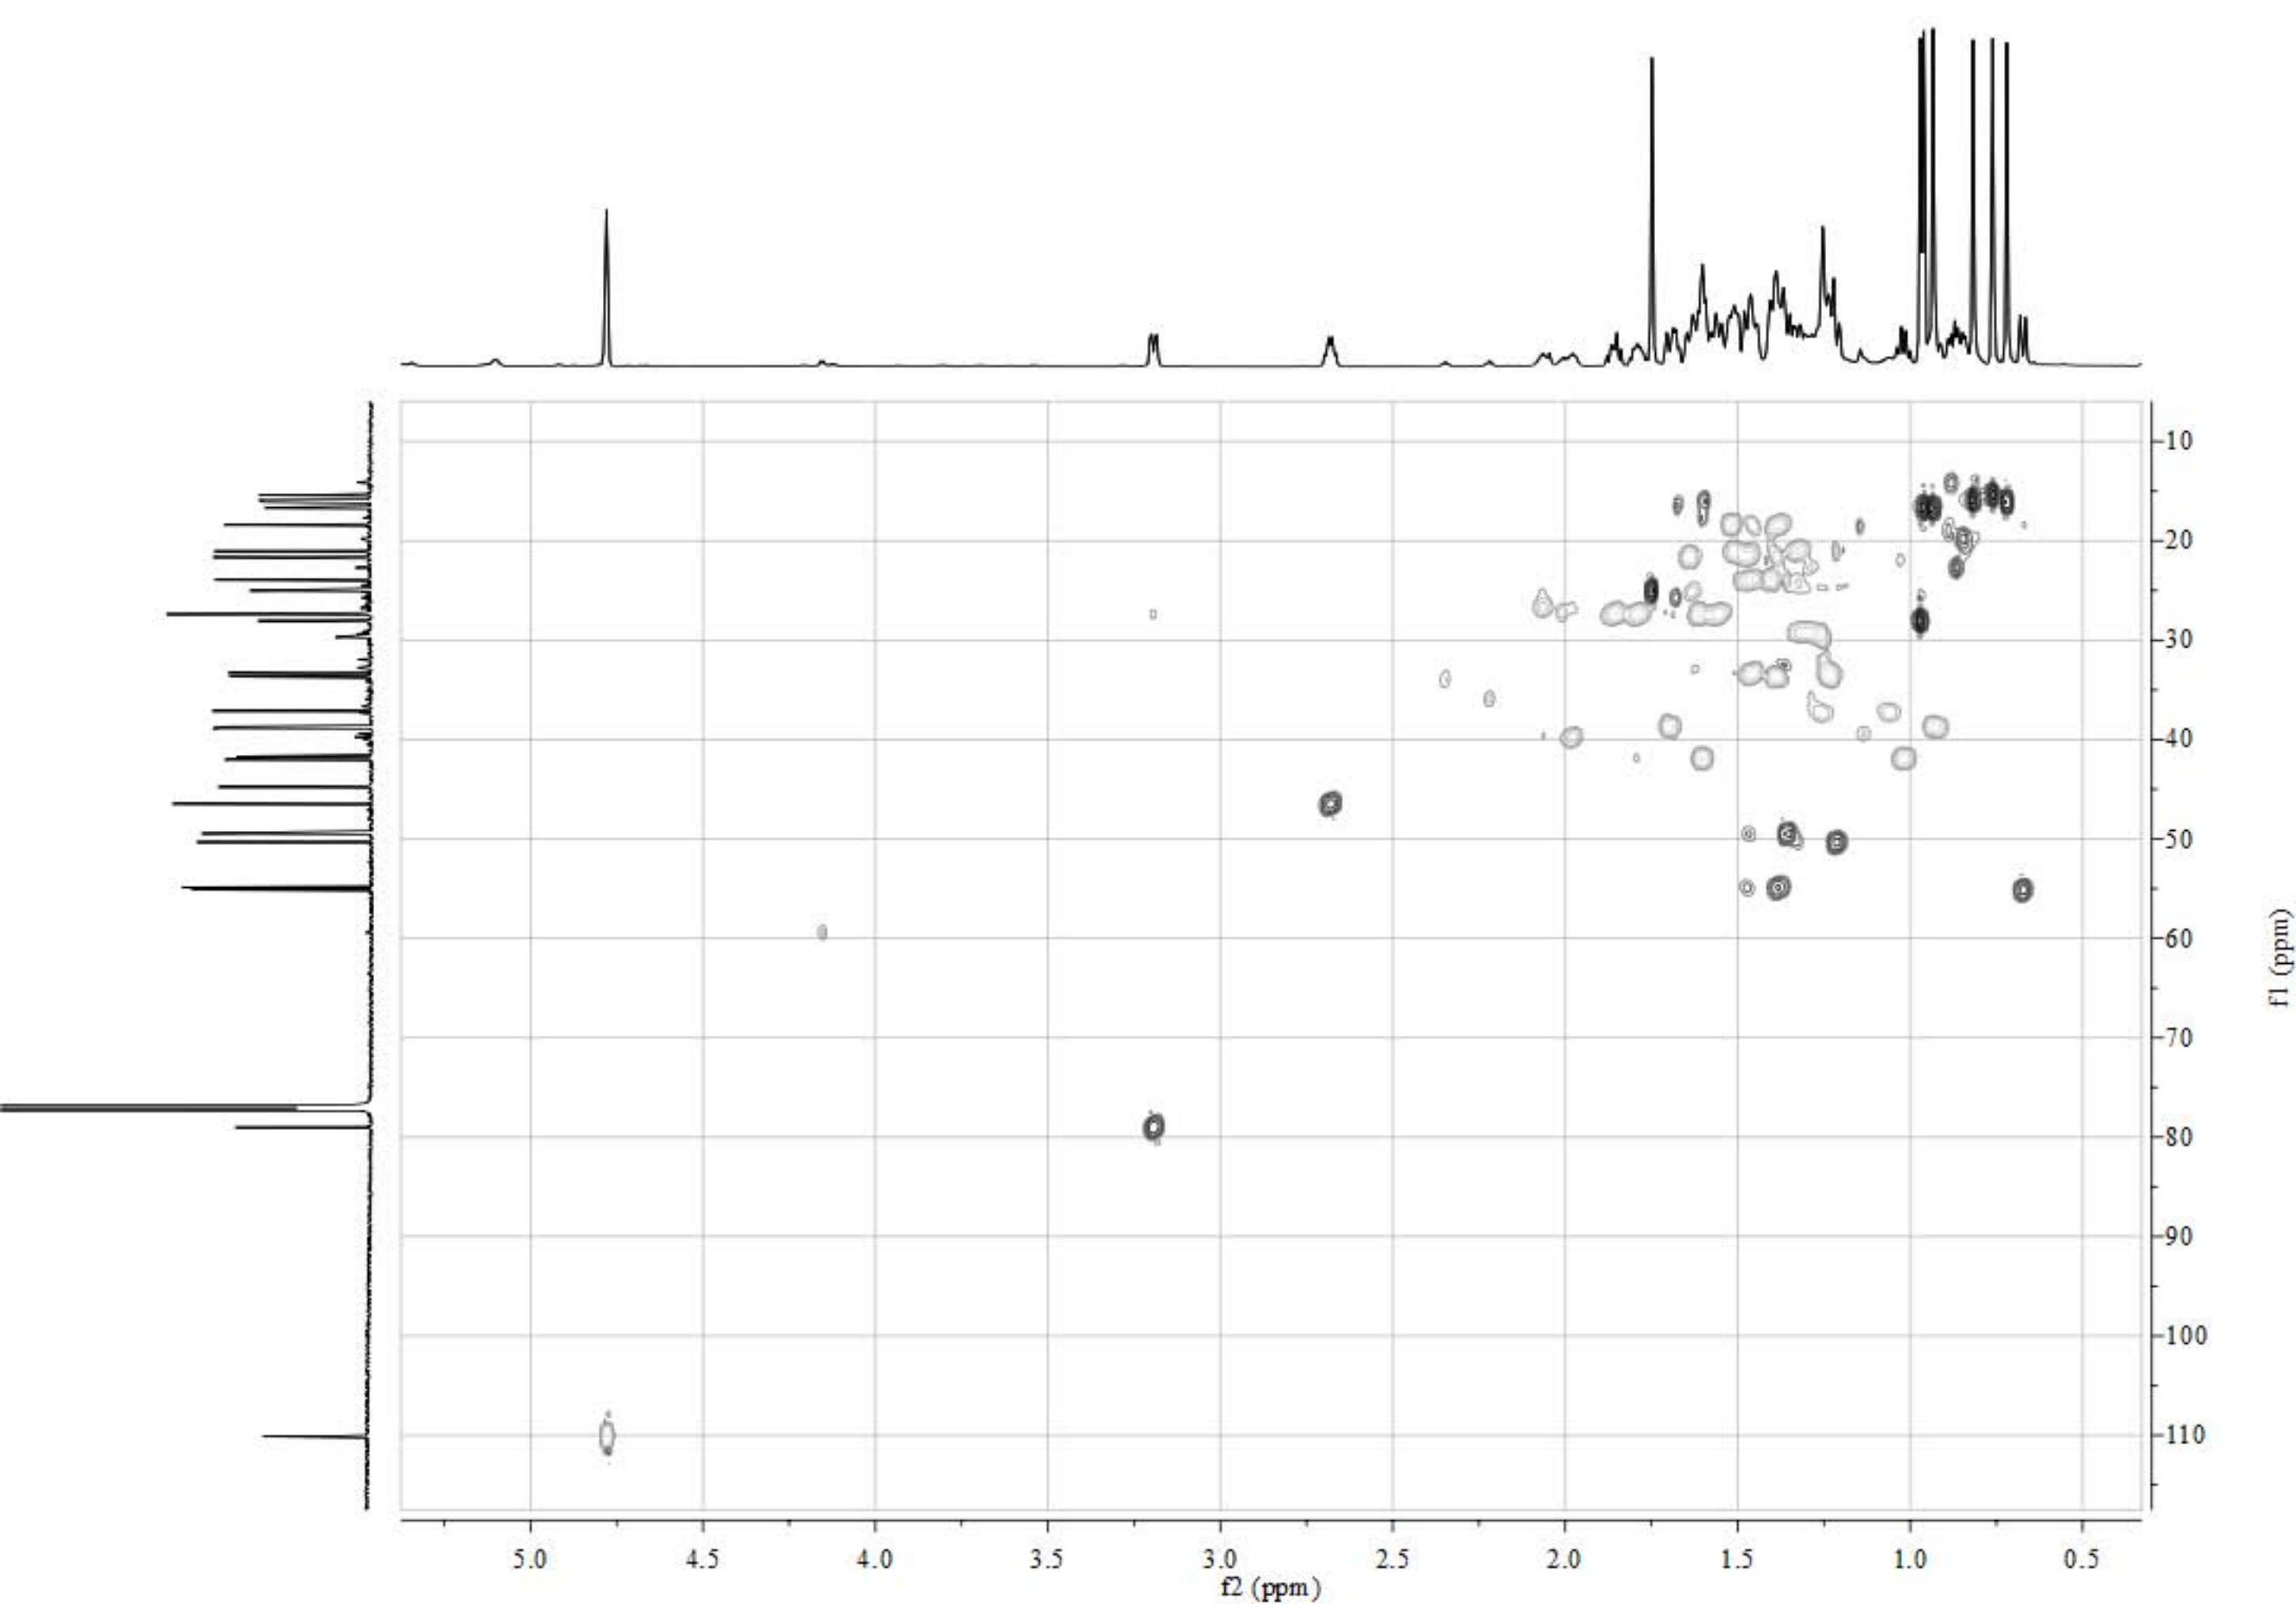

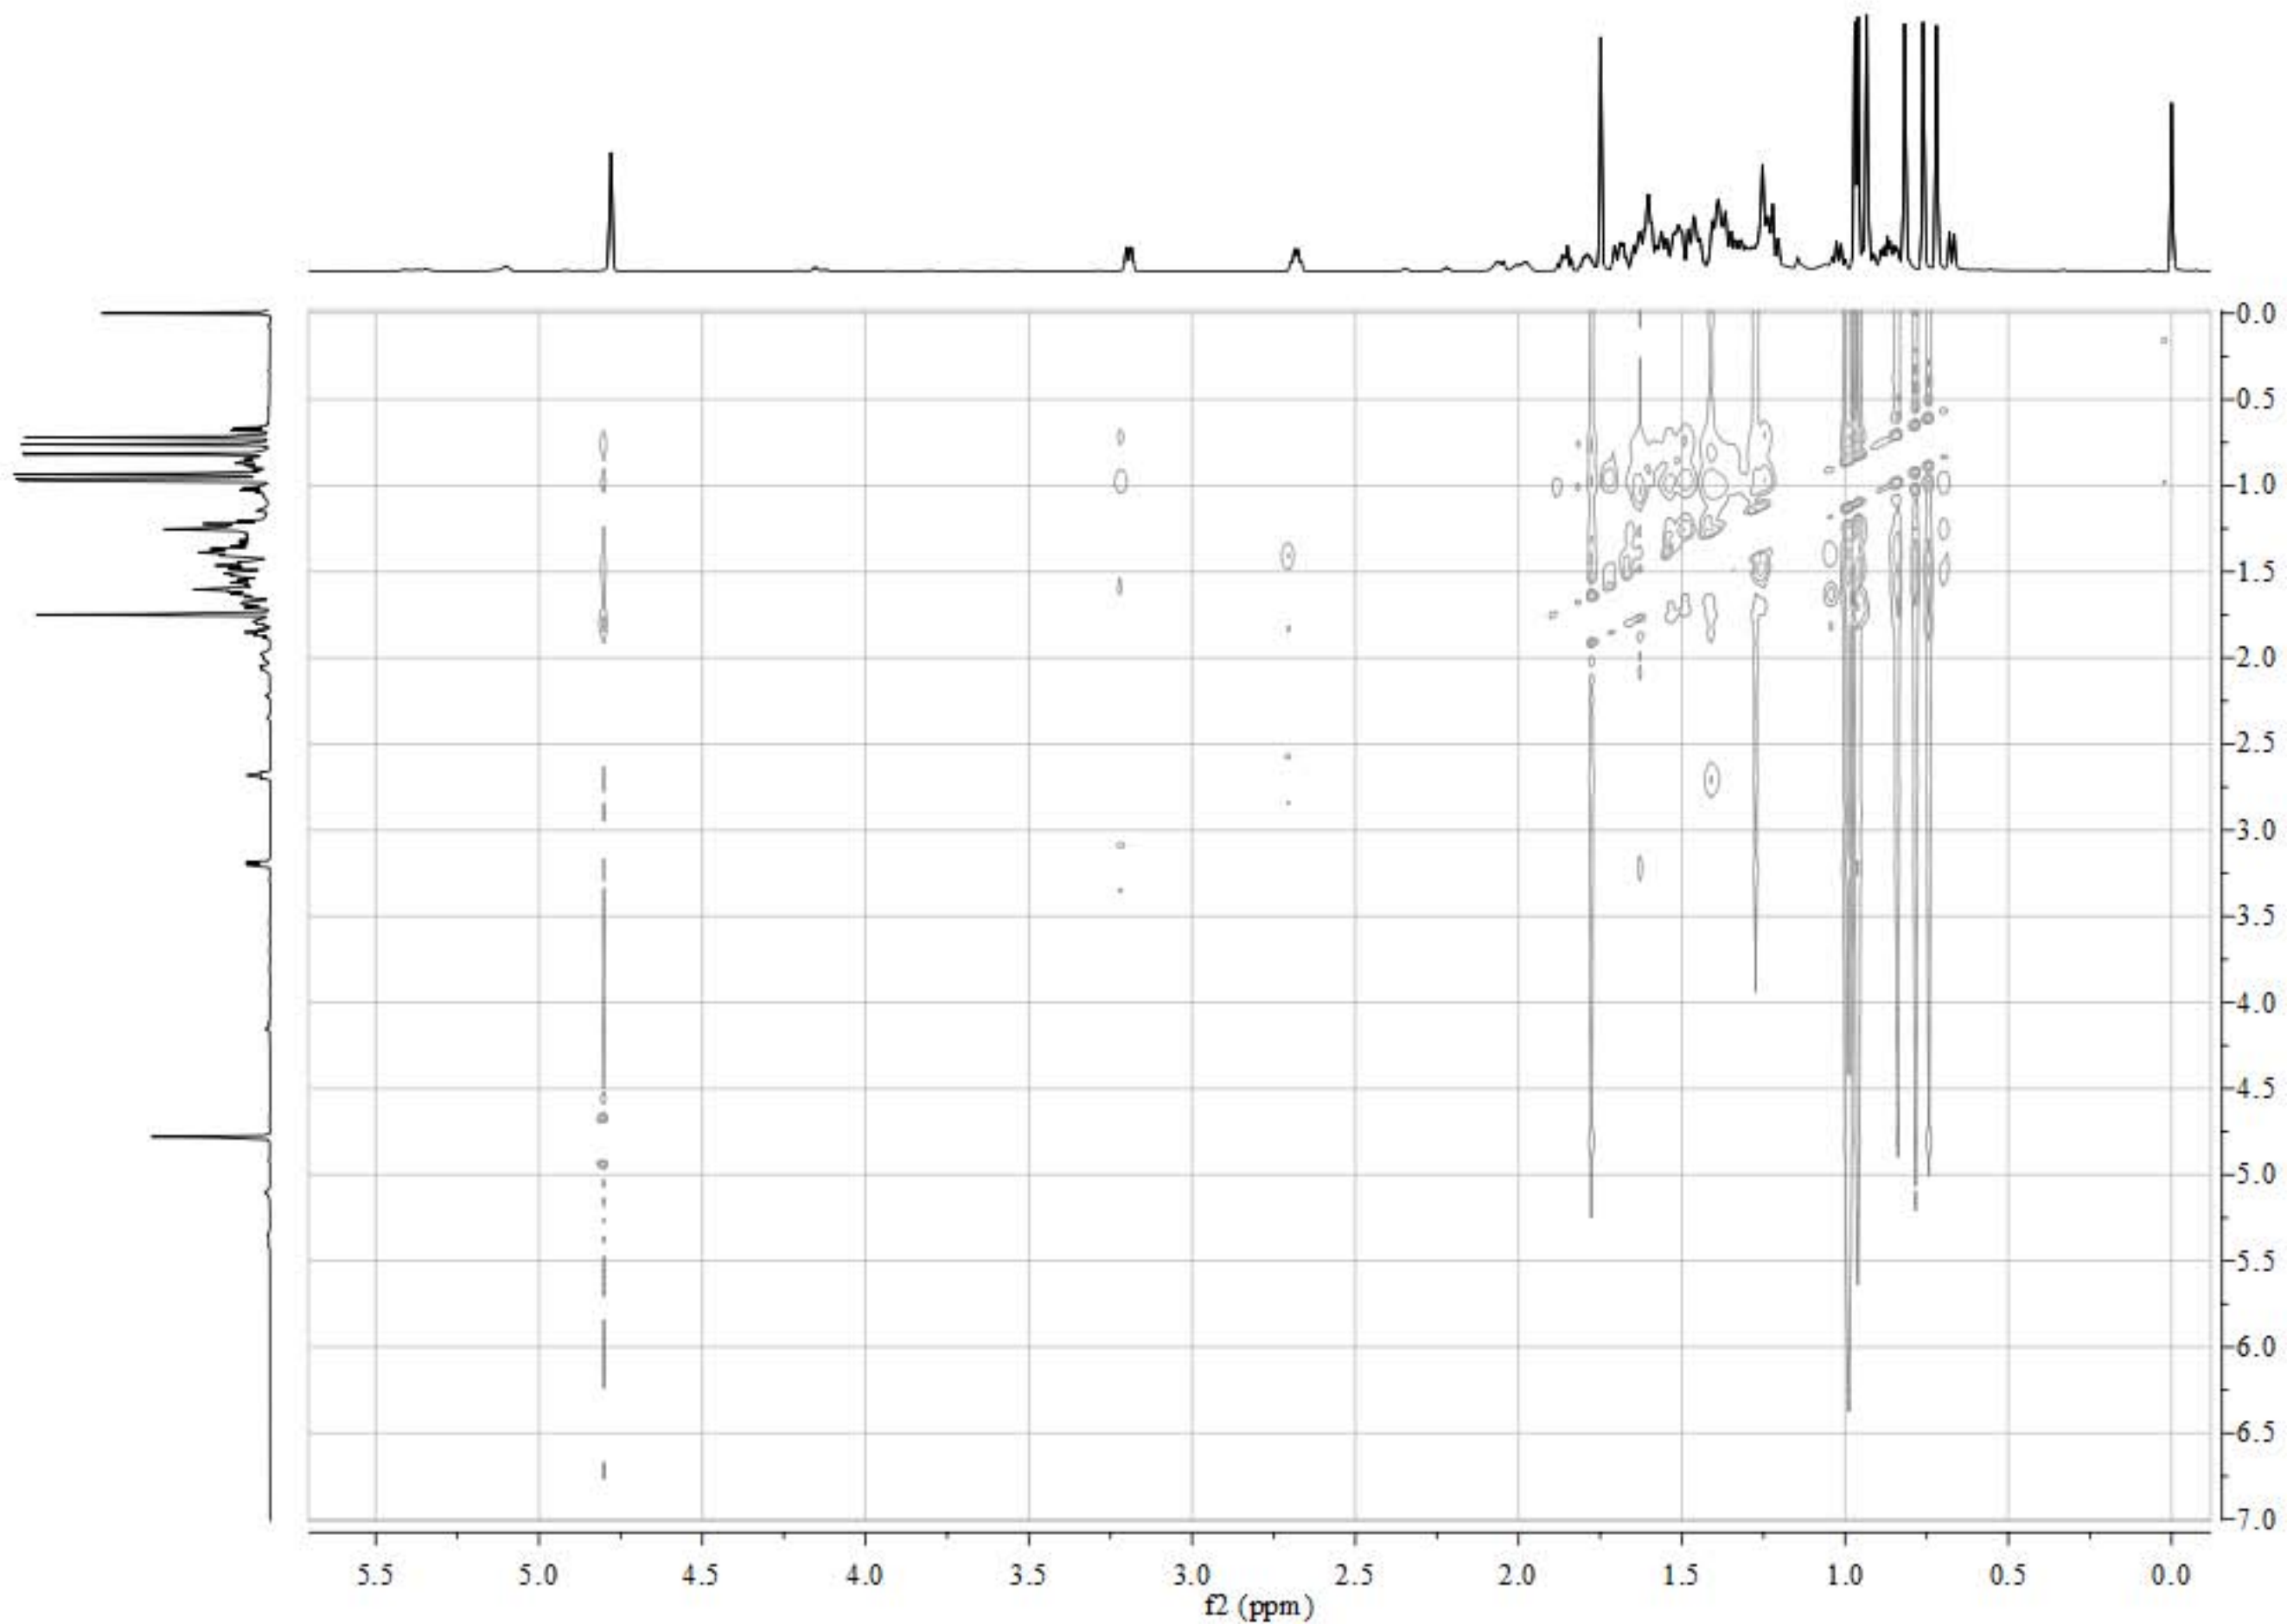

Supplement: pnas.2118709119.sd01.pdf [file pnas.2118709119.sd01.pdf]
