# Supplementary material for: A conserved mechanism affecting hydride shifting and deprotonation in the synthesis of hopane triterpenes as compositions of wax in oat
Source: PubMed Central journal article supplement — Proc Natl Acad Sci U S A. 2022 Mar 15;119(12):e2118709119. doi: 10.1073/pnas.2118709119 (PMC8944845; doi:10.1073/pnas.2118709119), 2022-03-15

## Supplementary Data 2. Spectroscopic data of hop-17(21)-en-3 $\beta$ -ol generated by AsHS2

### EIMS

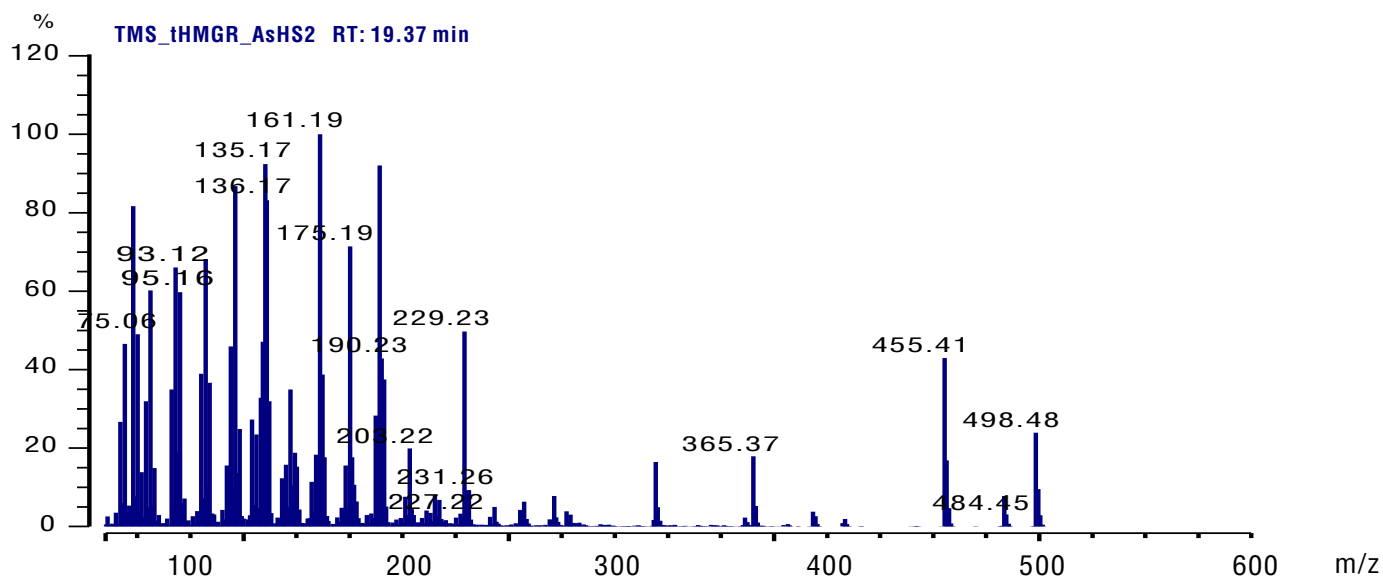

### NMR data

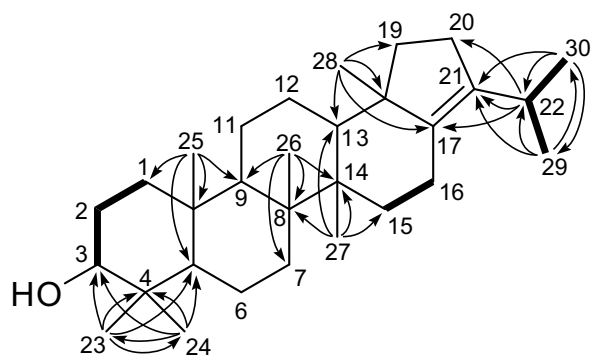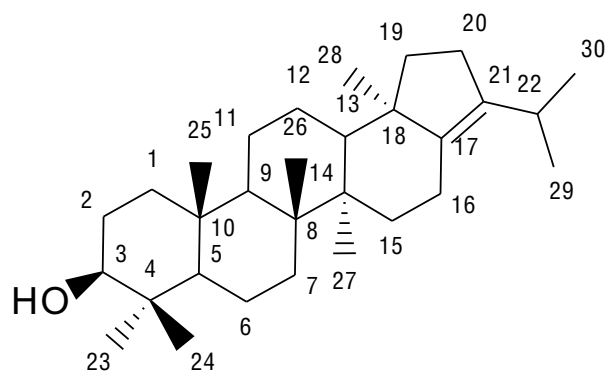

key HMBC (H→C) and <sup>1</sup>H-<sup>1</sup>H COSY  
 (—) Correlations of hop-17(21)-en-3 $\beta$ -ol

hop-17(21)-en-3 $\beta$ -ol

| NO. | $\delta_H$                | $\delta_C$ | NO. | $\delta_H$     | $\delta_C$ | NO. | $\delta_H$    | $\delta_C$ |
|-----|---------------------------|------------|-----|----------------|------------|-----|---------------|------------|
| 1   | 0.96 m, 1.73 m            | 39.0       | 11  | 1.27 m, 1.54 m | 21.5       | 21  | /             | 140.1      |
| 2   | 1.60 m                    | 27.5       | 12  | 1.39 m         | 24.2       | 22  | /             | 26.5       |
| 3   | 3.20 ddd (11.2, 6.1, 4.9) | 79.2       | 13  | 1.42 m         | 49.5       | 23  | 2.62, m       | 28.2       |
| 4   | /                         | 39.0       | 14  | /              | 41.8       | 24  | 0.98, s       | 15.5       |
| 5   | 0.69 m                    | 55.4       | 15  | 1.27 m         | 32.0       | 25  | 0.76, s       | 16.4       |
| 6   | 1.39 m, 1.54 m            | 18.5       | 16  | 1.90 m, 2.27 m | 20.0       | 26  | 0.83, s       | 16.5       |
| 7   | 1.30 m, 1.45 m            | 33.6       | 17  | /              | 136.2      | 27  | 0.93, s       | 15.1       |
| 8   | /                         | 42.2       | 18  | /              | 50.0       | 28  | 1.03, s       | 19.2       |
| 9   | 1.28 m                    | 51.0       | 19  | 1.31 m, 1.66 m | 41.9       | 29  | 0.84, s       | 21.5       |
| 10  | /                         | 37.3       | 20  | 2.12 m, 2.21 m | 27.6       | 30  | 0.92, d (6.6) | 22.1       |

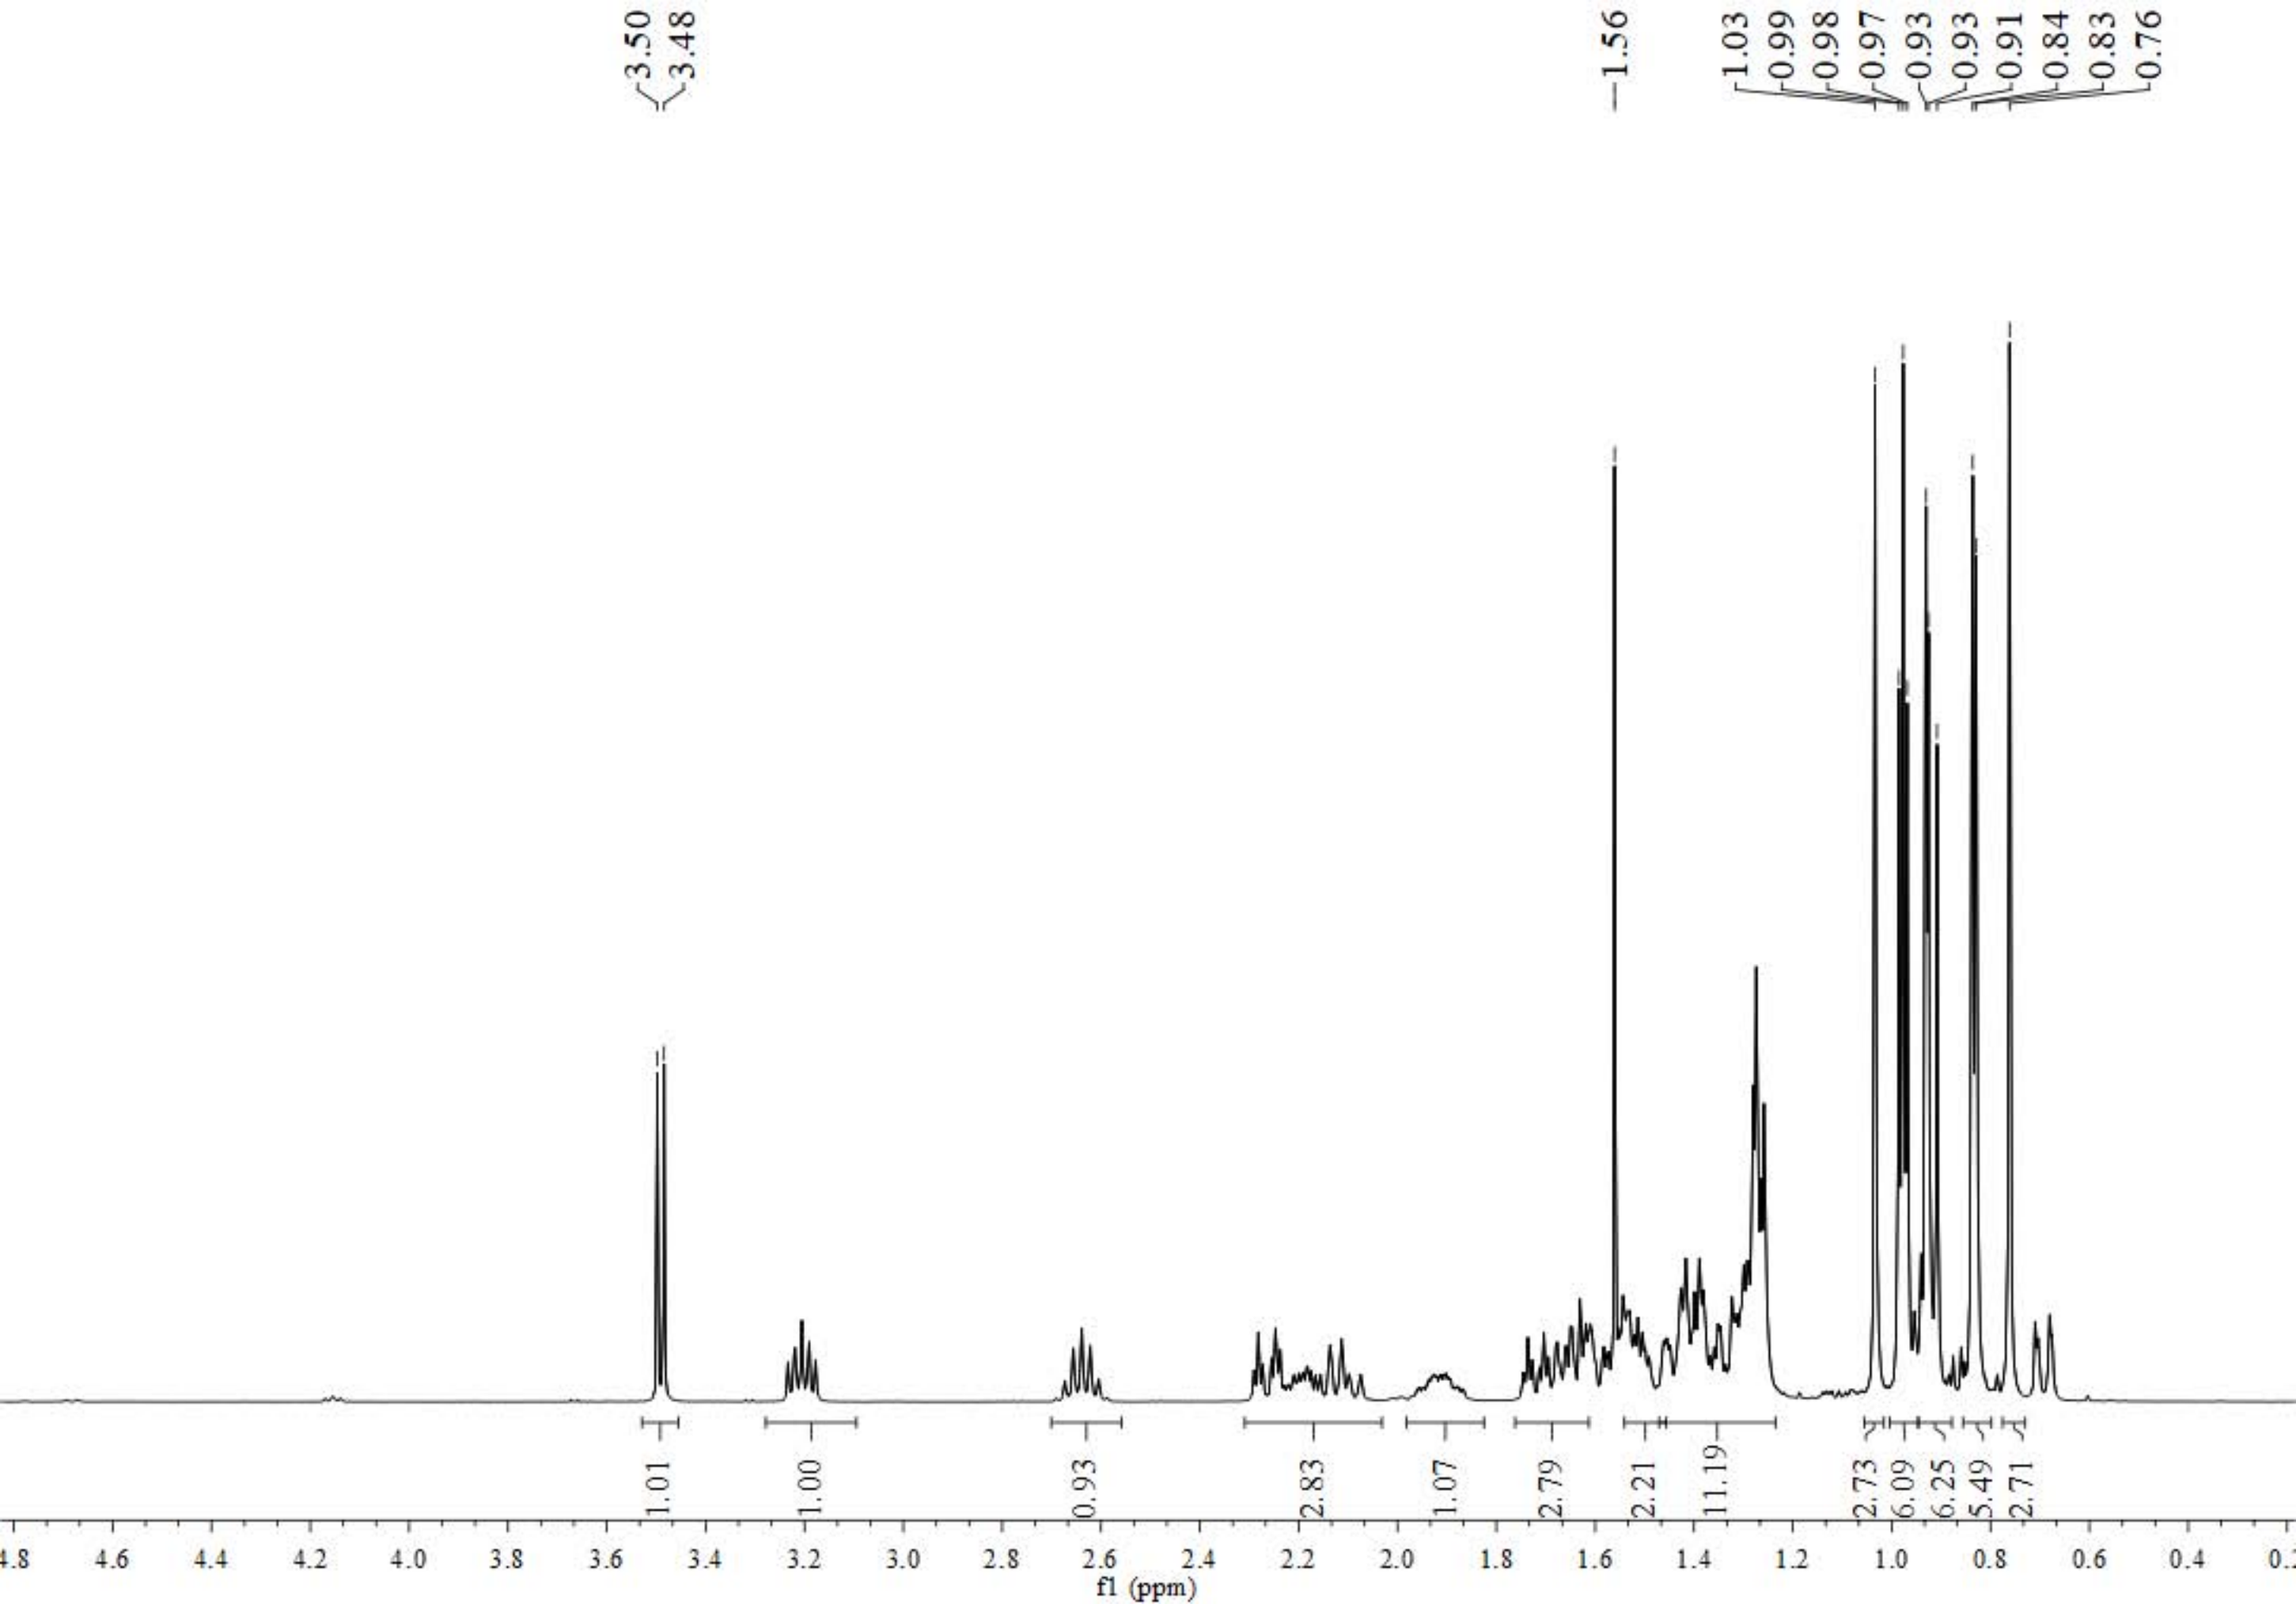

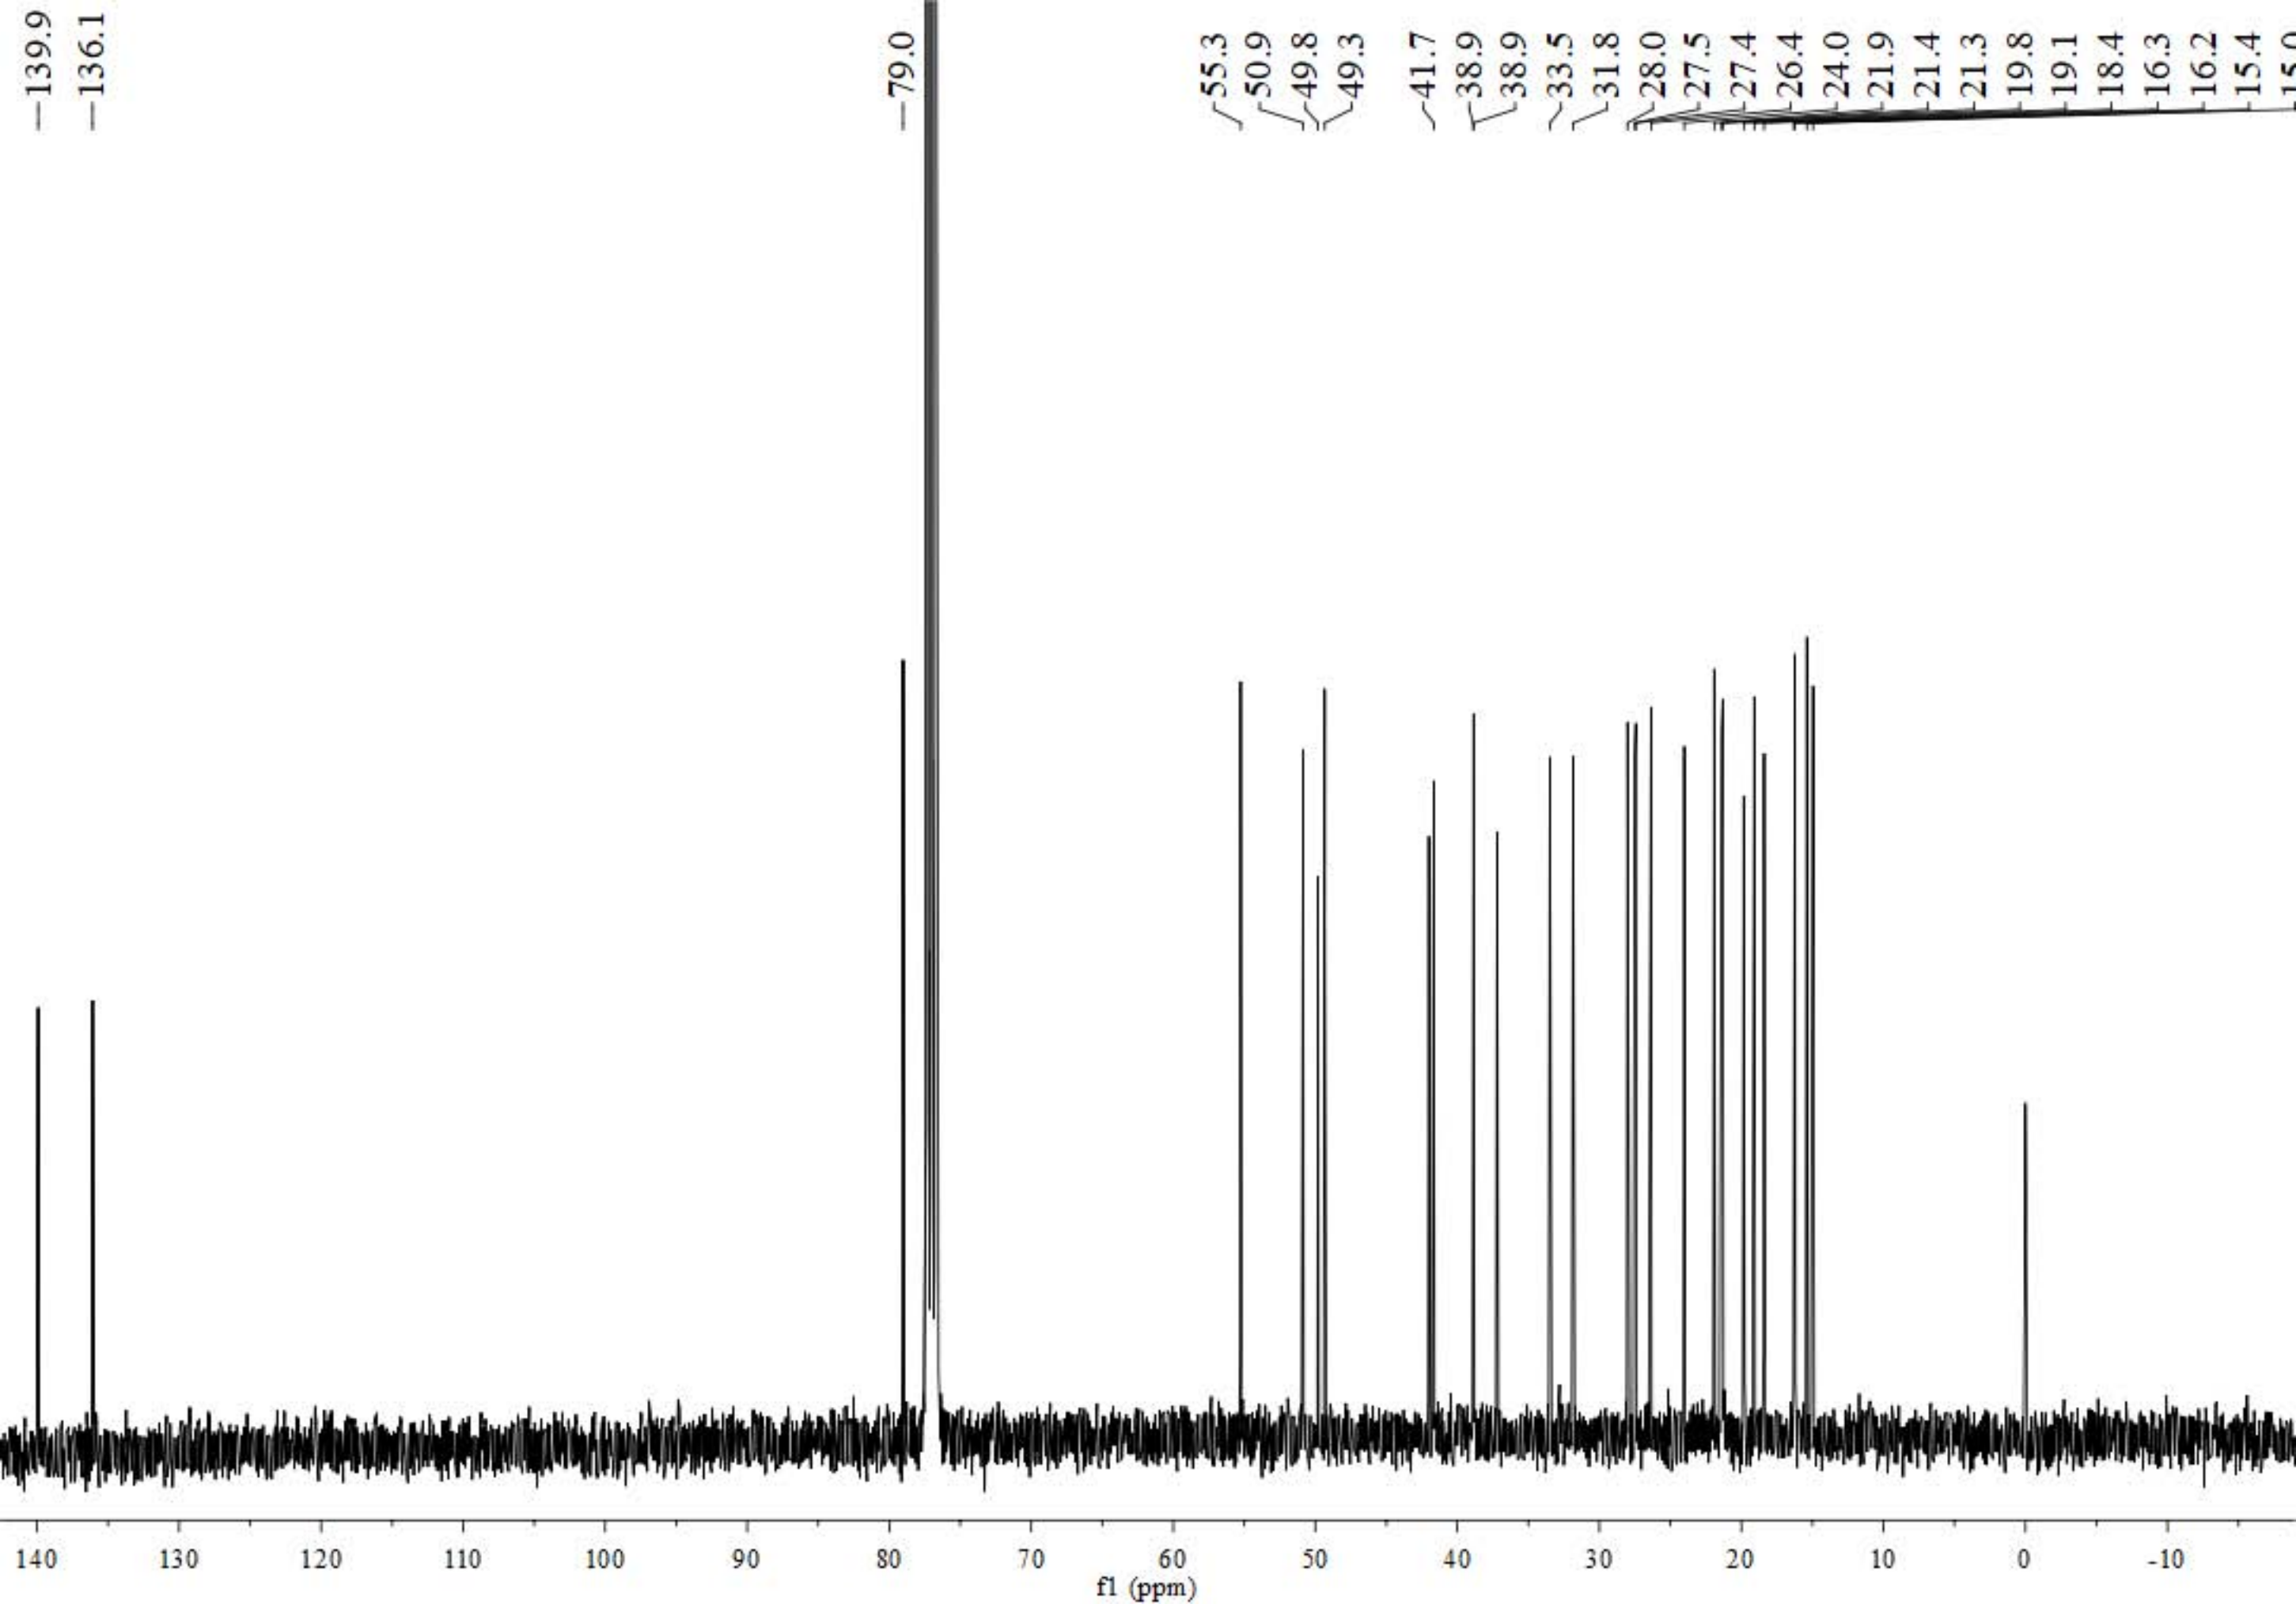

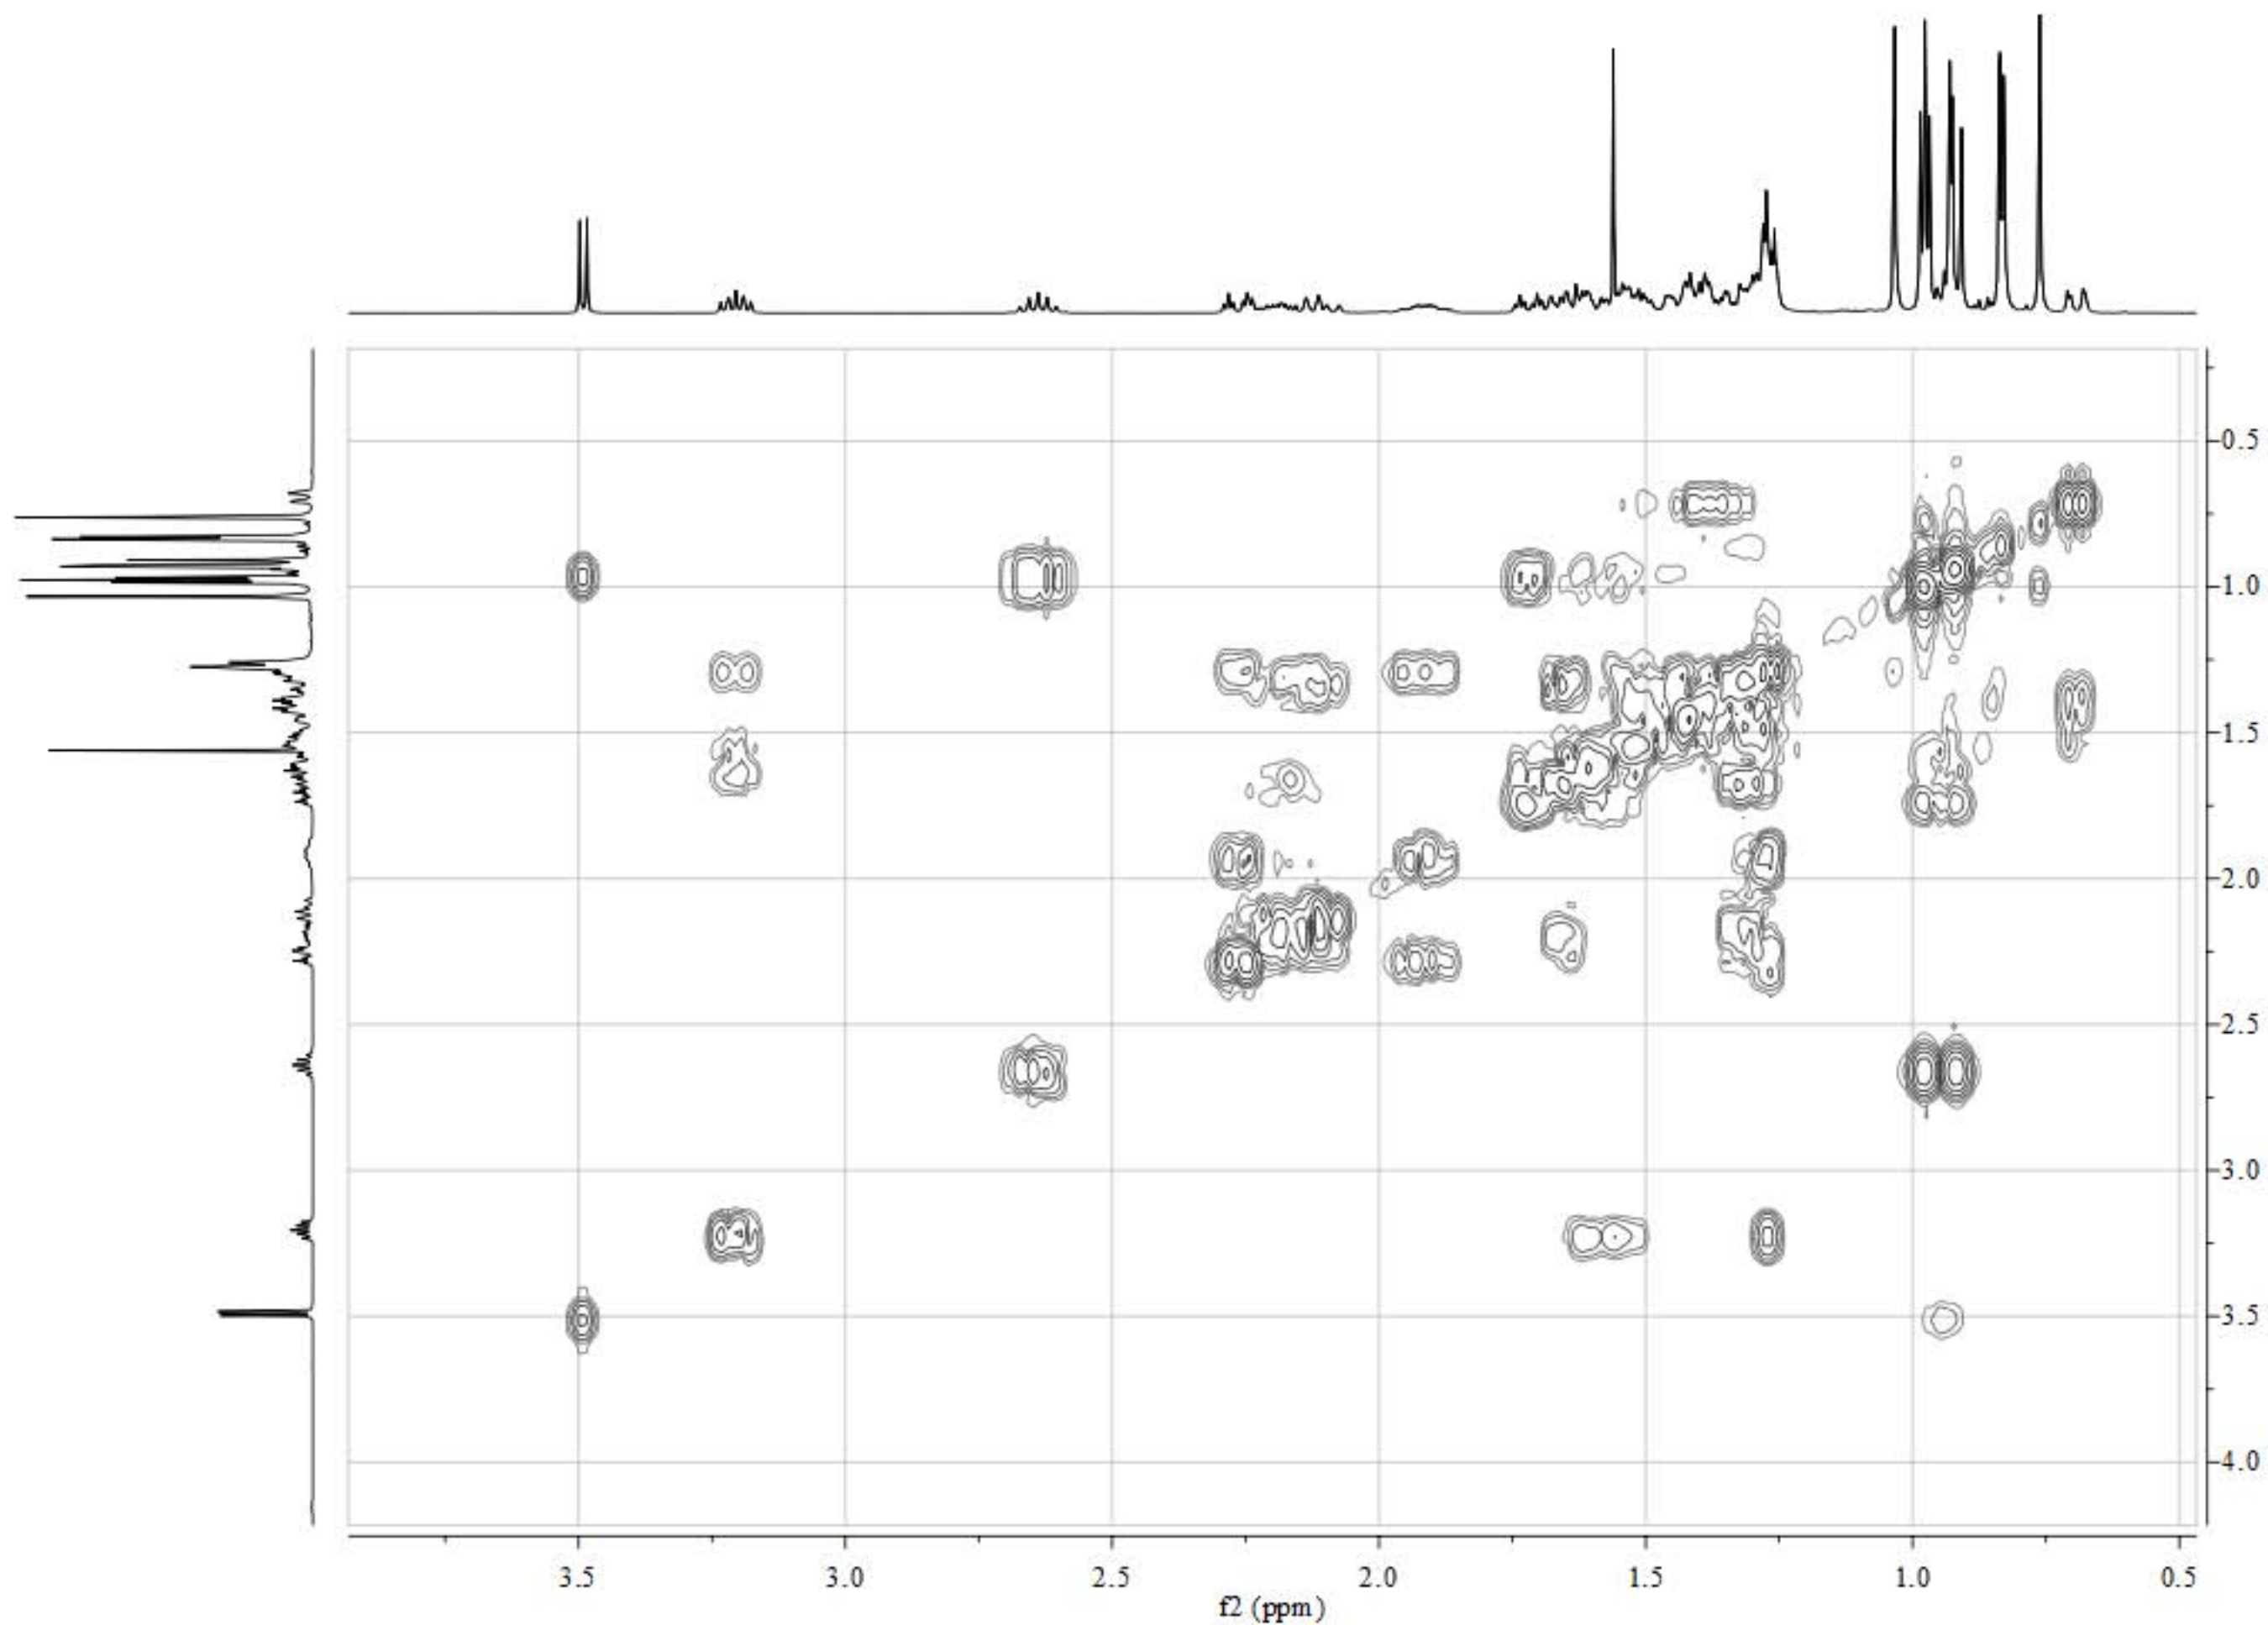

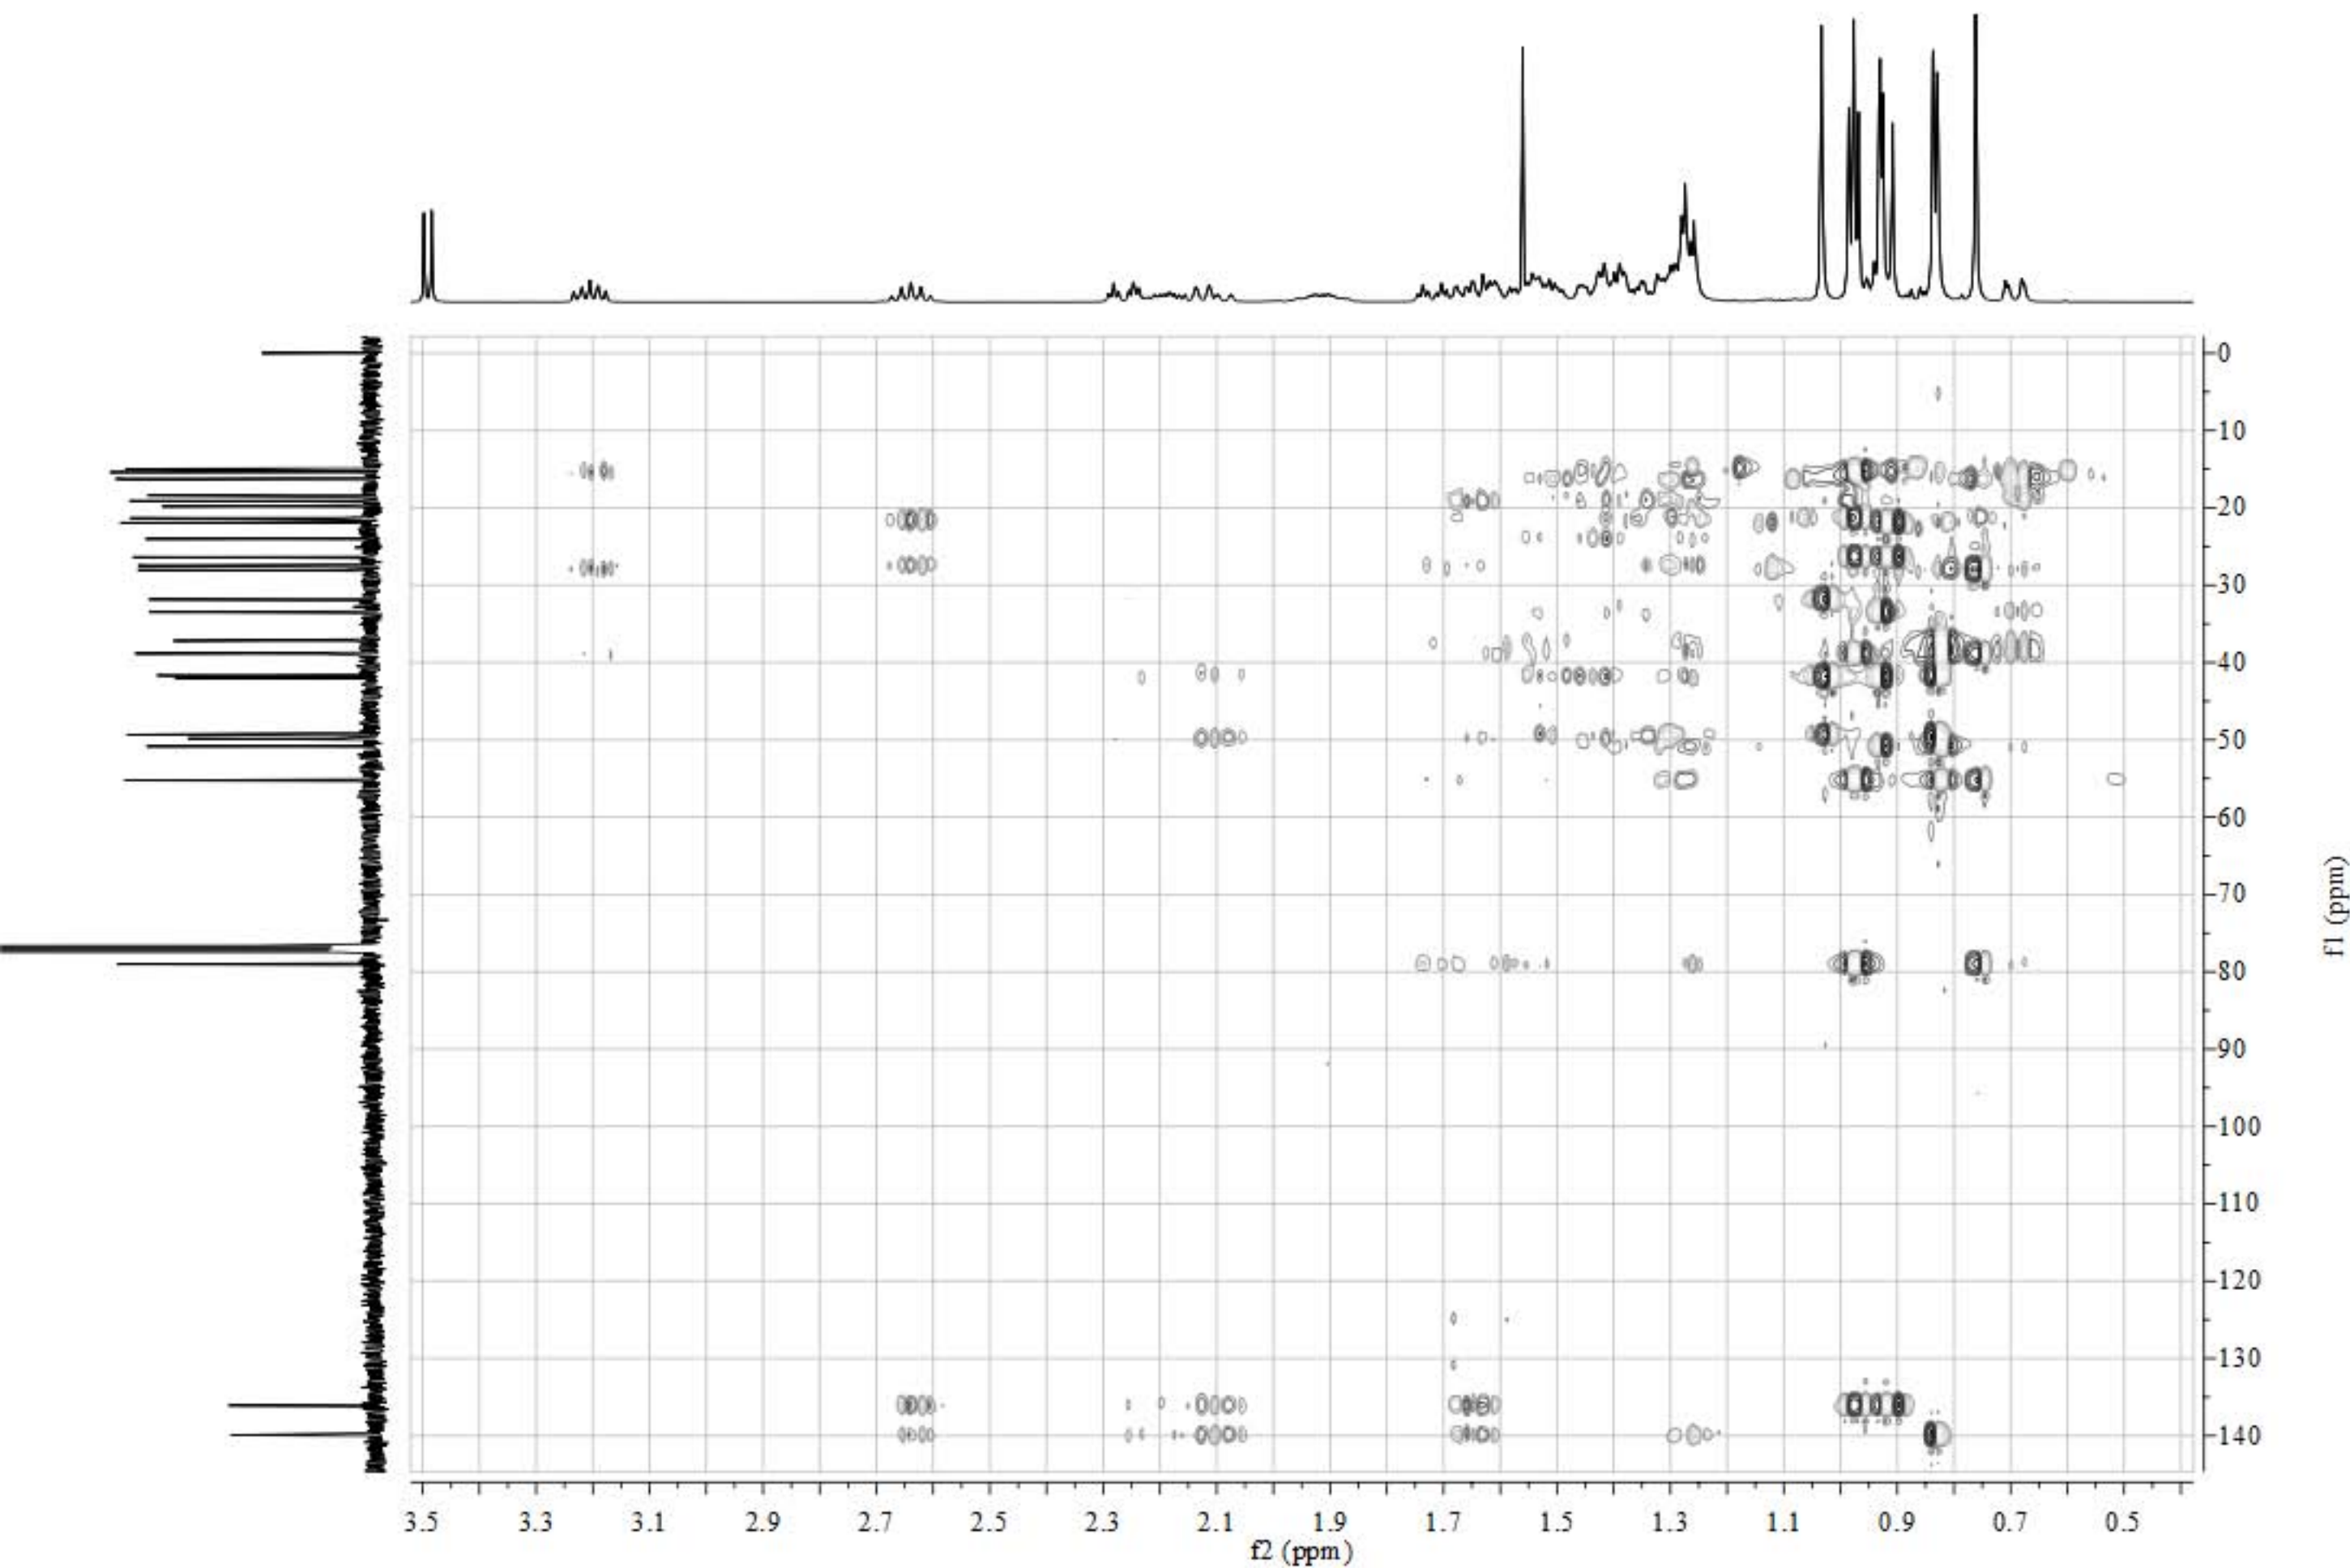

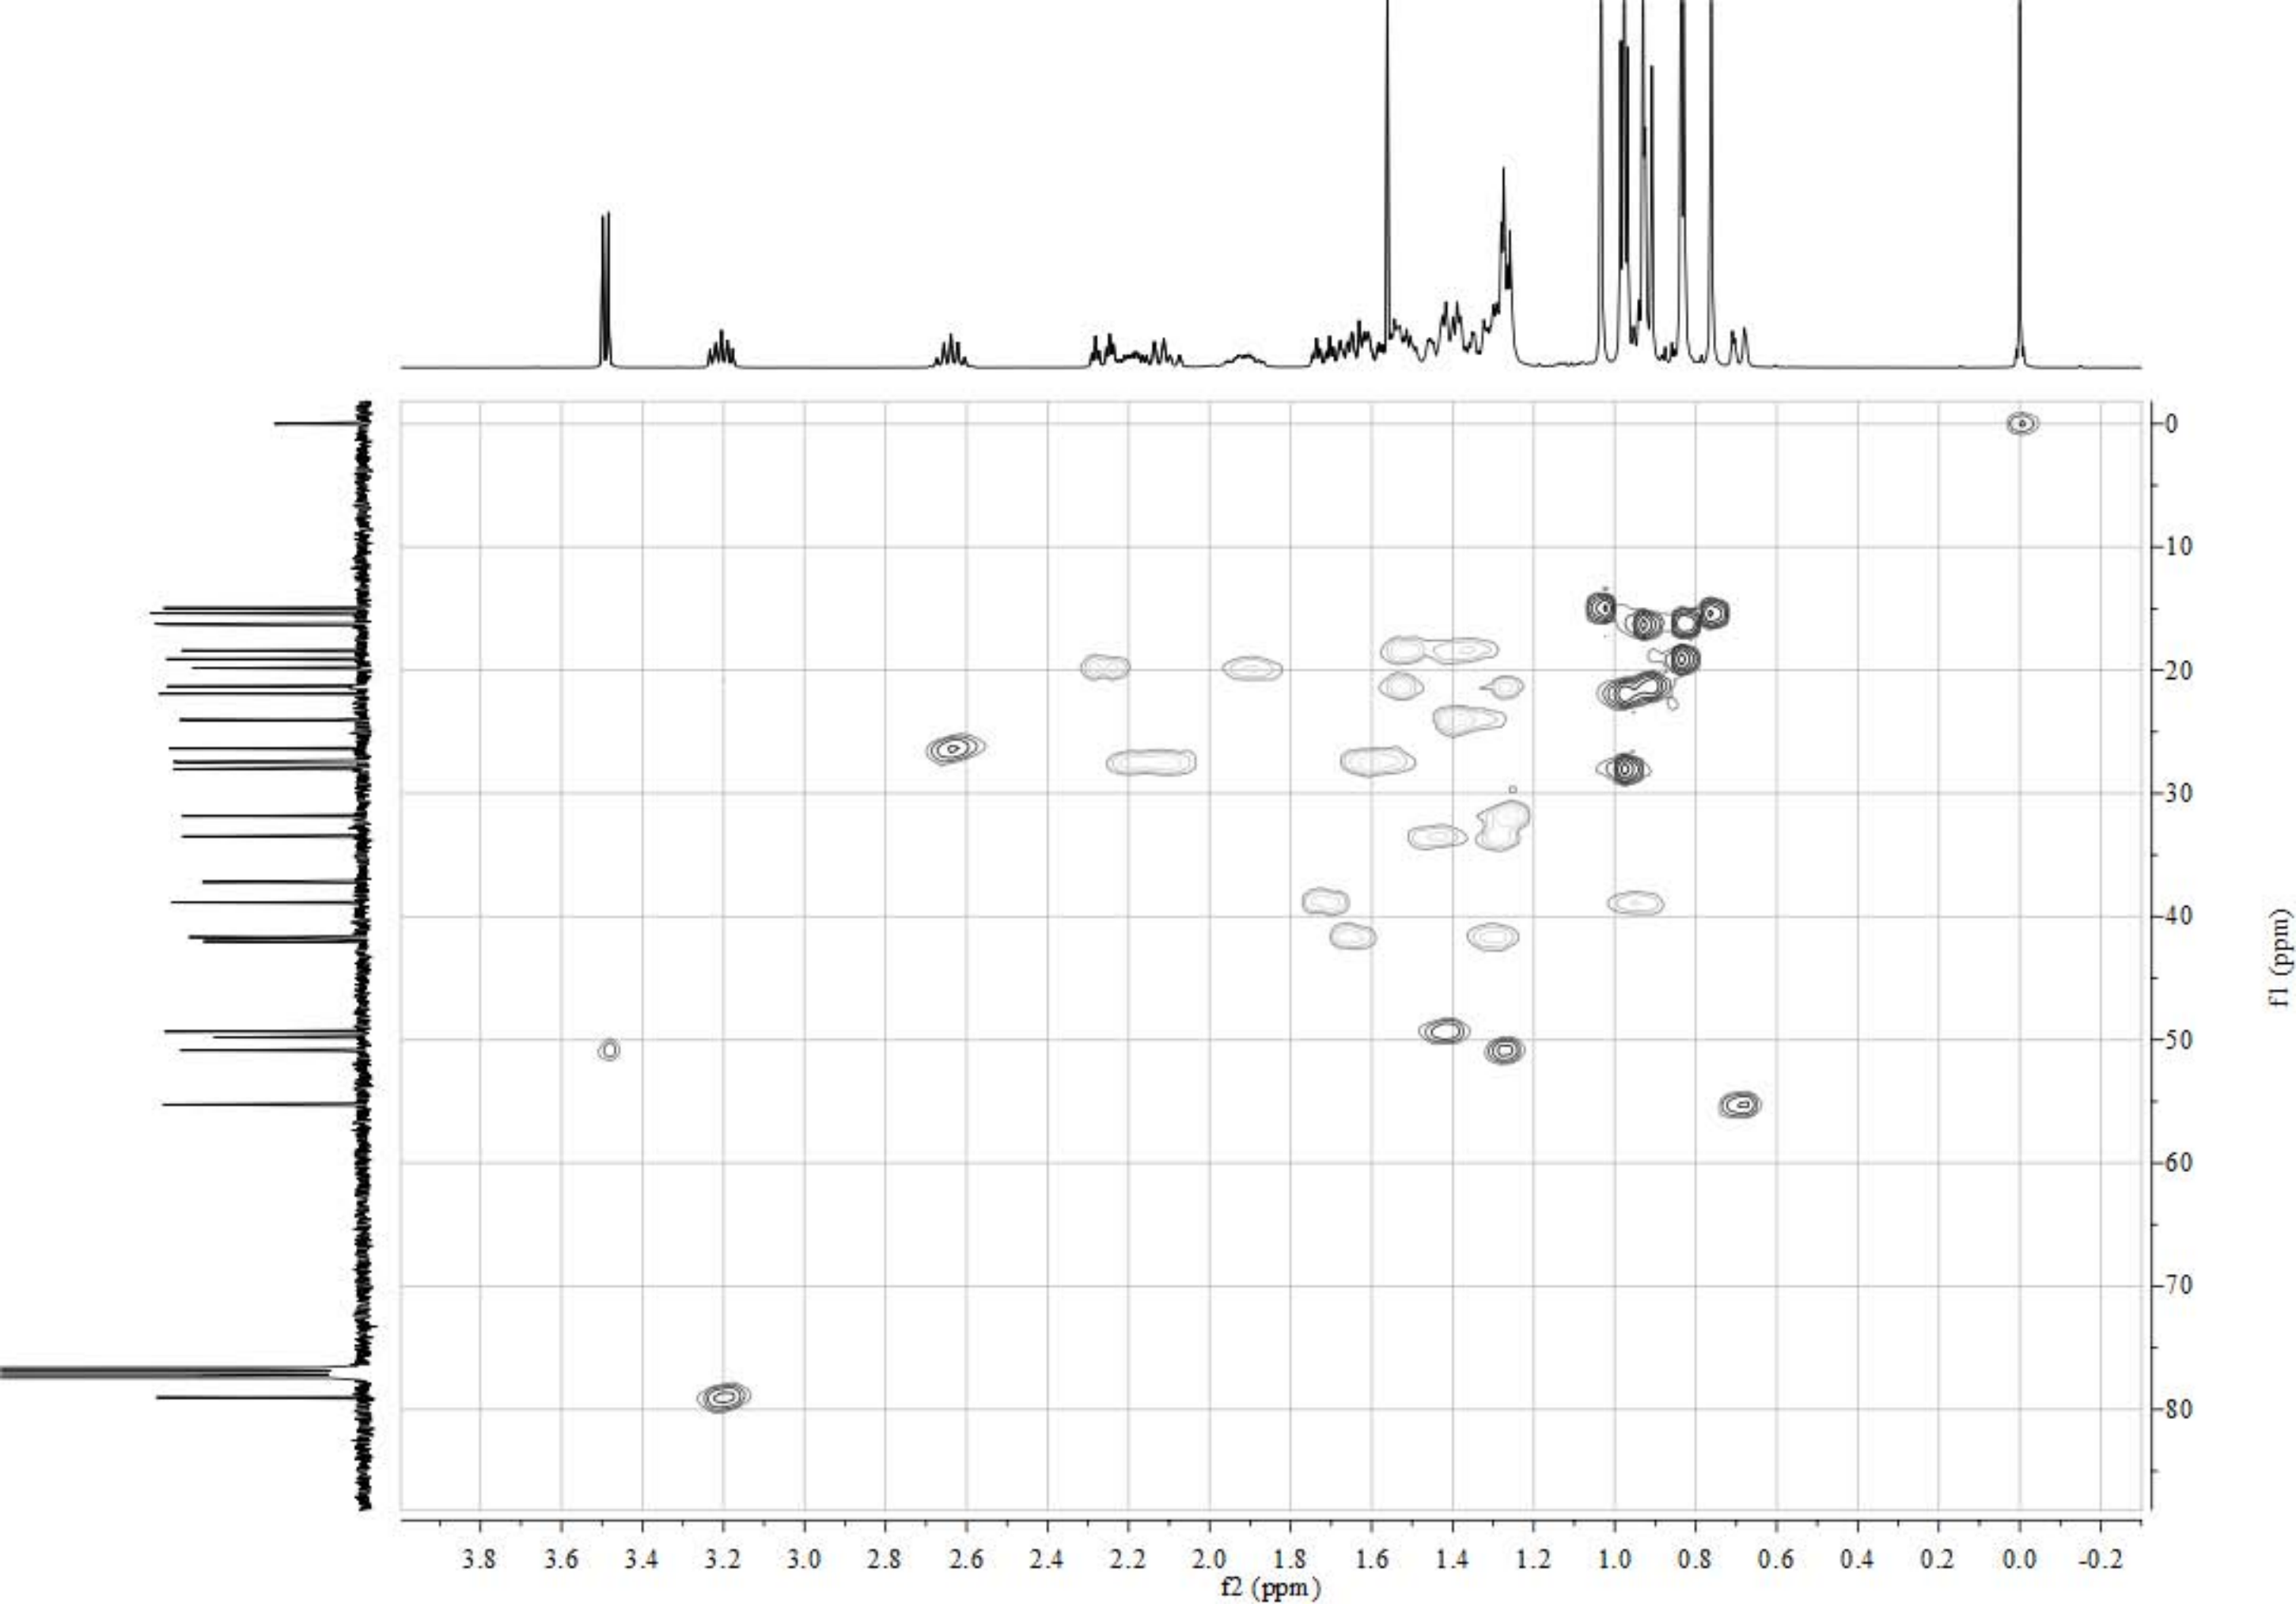



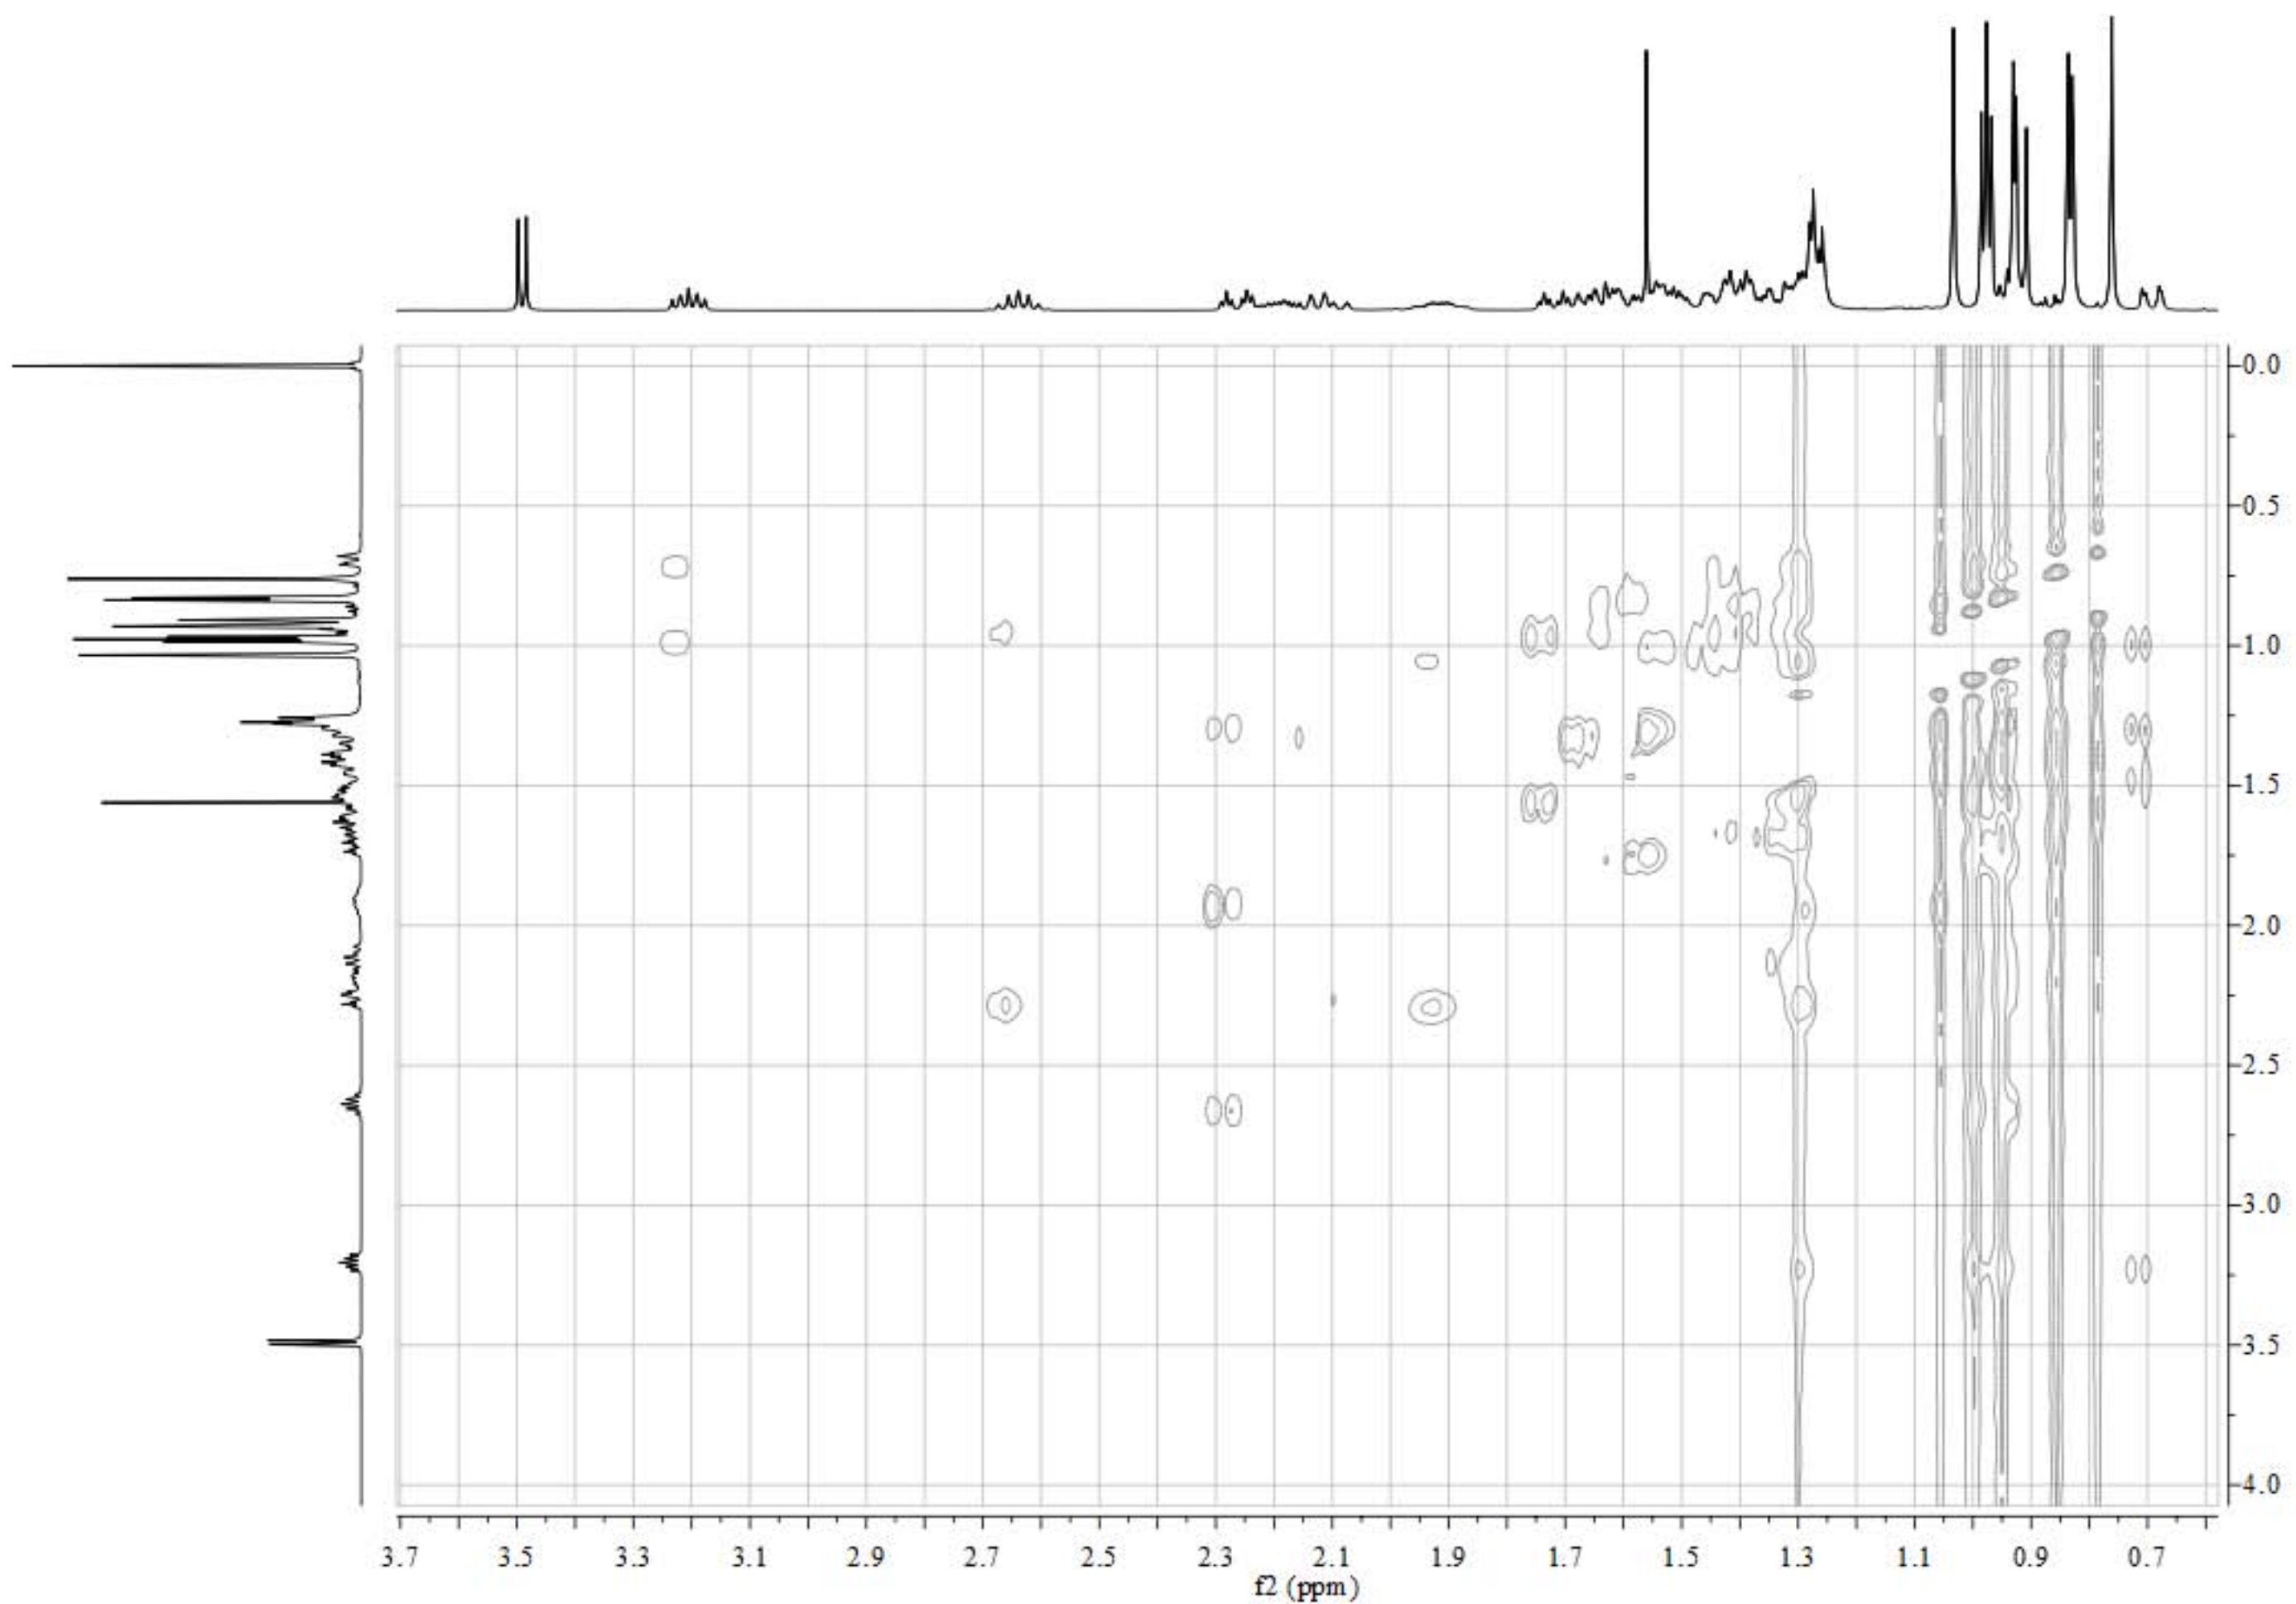

Supplement: pnas.2118709119.sd02.pdf [file pnas.2118709119.sd02.pdf]
