# Supplementary material for: A conserved mechanism affecting hydride shifting and deprotonation in the synthesis of hopane triterpenes as compositions of wax in oat
Source: PubMed Central journal article supplement — Proc Natl Acad Sci U S A. 2022 Mar 15;119(12):e2118709119. doi: 10.1073/pnas.2118709119 (PMC8944845; doi:10.1073/pnas.2118709119), 2022-03-15

Supplementary Data 3. Spectroscopic data of isomtiol generated by AsHS2<sup>V1211/C722A</sup>

EIMS

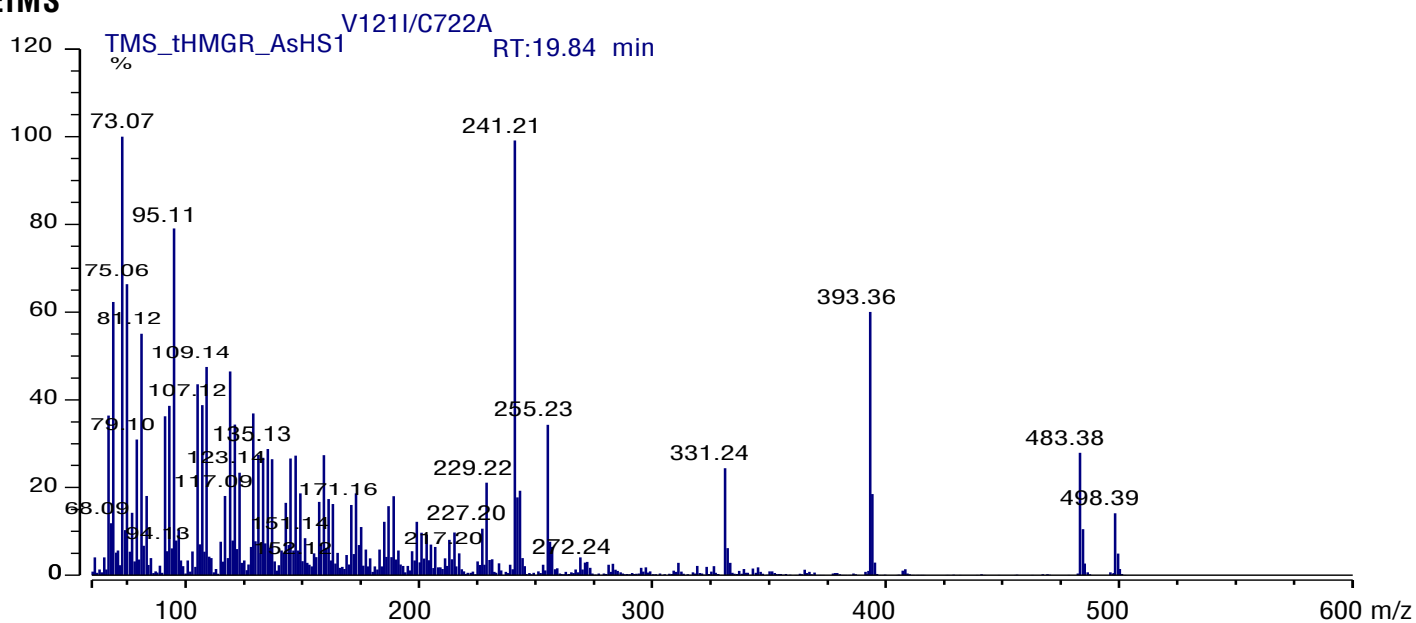

NMR data

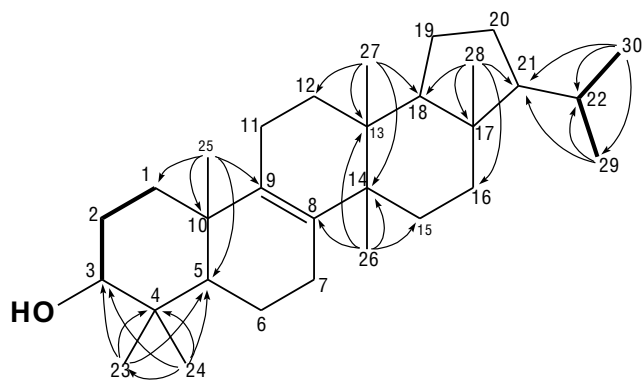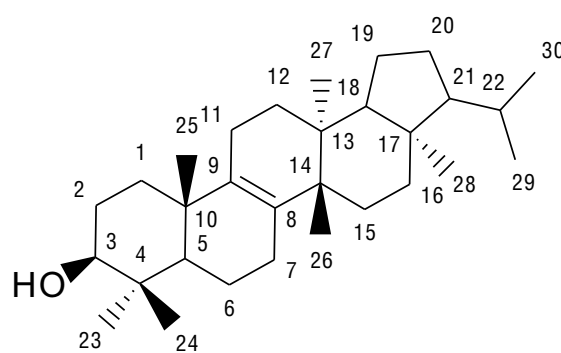

key HMBC (H→C) and <sup>1</sup>H-<sup>1</sup>H COSY  
(—)Correlations of isomtiol

isomtiol

| NO. | $\delta_H$          | $\delta_C$ | NO. | $\delta_H$     | $\delta_C$ | NO. | $\delta_H$ | $\delta_C$ |
|-----|---------------------|------------|-----|----------------|------------|-----|------------|------------|
| 1   | 1.47 m, 1.66 m      | 36.05      | 11  | 1.27 m, 1.40 m | 20.50      | 21  | 0.98 m     | 59.91      |
| 2   | 1.59 m, 1.69 m      | 28.13      | 12  | 1.34 m, 1.71 m | 27.07      | 22  | 1.46 m     | 30.89      |
| 3   | 3.24 dd (11.9, 3.5) | 79.14      | 13  | /              | 36.83      | 23  | 1.00 s     | 28.20      |
| 4   | /                   | 39.02      | 14  | /              | 41.18      | 24  | 0.76 s     | 15.92      |
| 5   | 1.08 m              | 50.55      | 15  | 1.26 m, 1.42 m | 30.37      | 25  | 0.95 s     | 20.34      |
| 6   | 1.39 m, 1.71 m      | 19.25      | 16  | 1.19 m, 1.80 m | 35.47      | 26  | 0.89 s     | 22.20      |
| 7   | 1.20 m, 1.83 m      | 28.49      | 17  | /              | 43.01      | 27  | 0.80 s     | 15.67      |
| 8   | /                   | 134.28     | 18  | 1.53 m         | 52.84      | 28  | 0.77 s     | 14.76      |
| 9   | /                   | 134.38     | 19  | 1.85 m, 2.09 m | 19.03      | 29  | 0.95 s     | 22.26      |
| 10  | /                   | 37.70      | 20  | 1.97 m, 2.17 m | 27.34      | 30  | 0.83 s     | 23.12      |

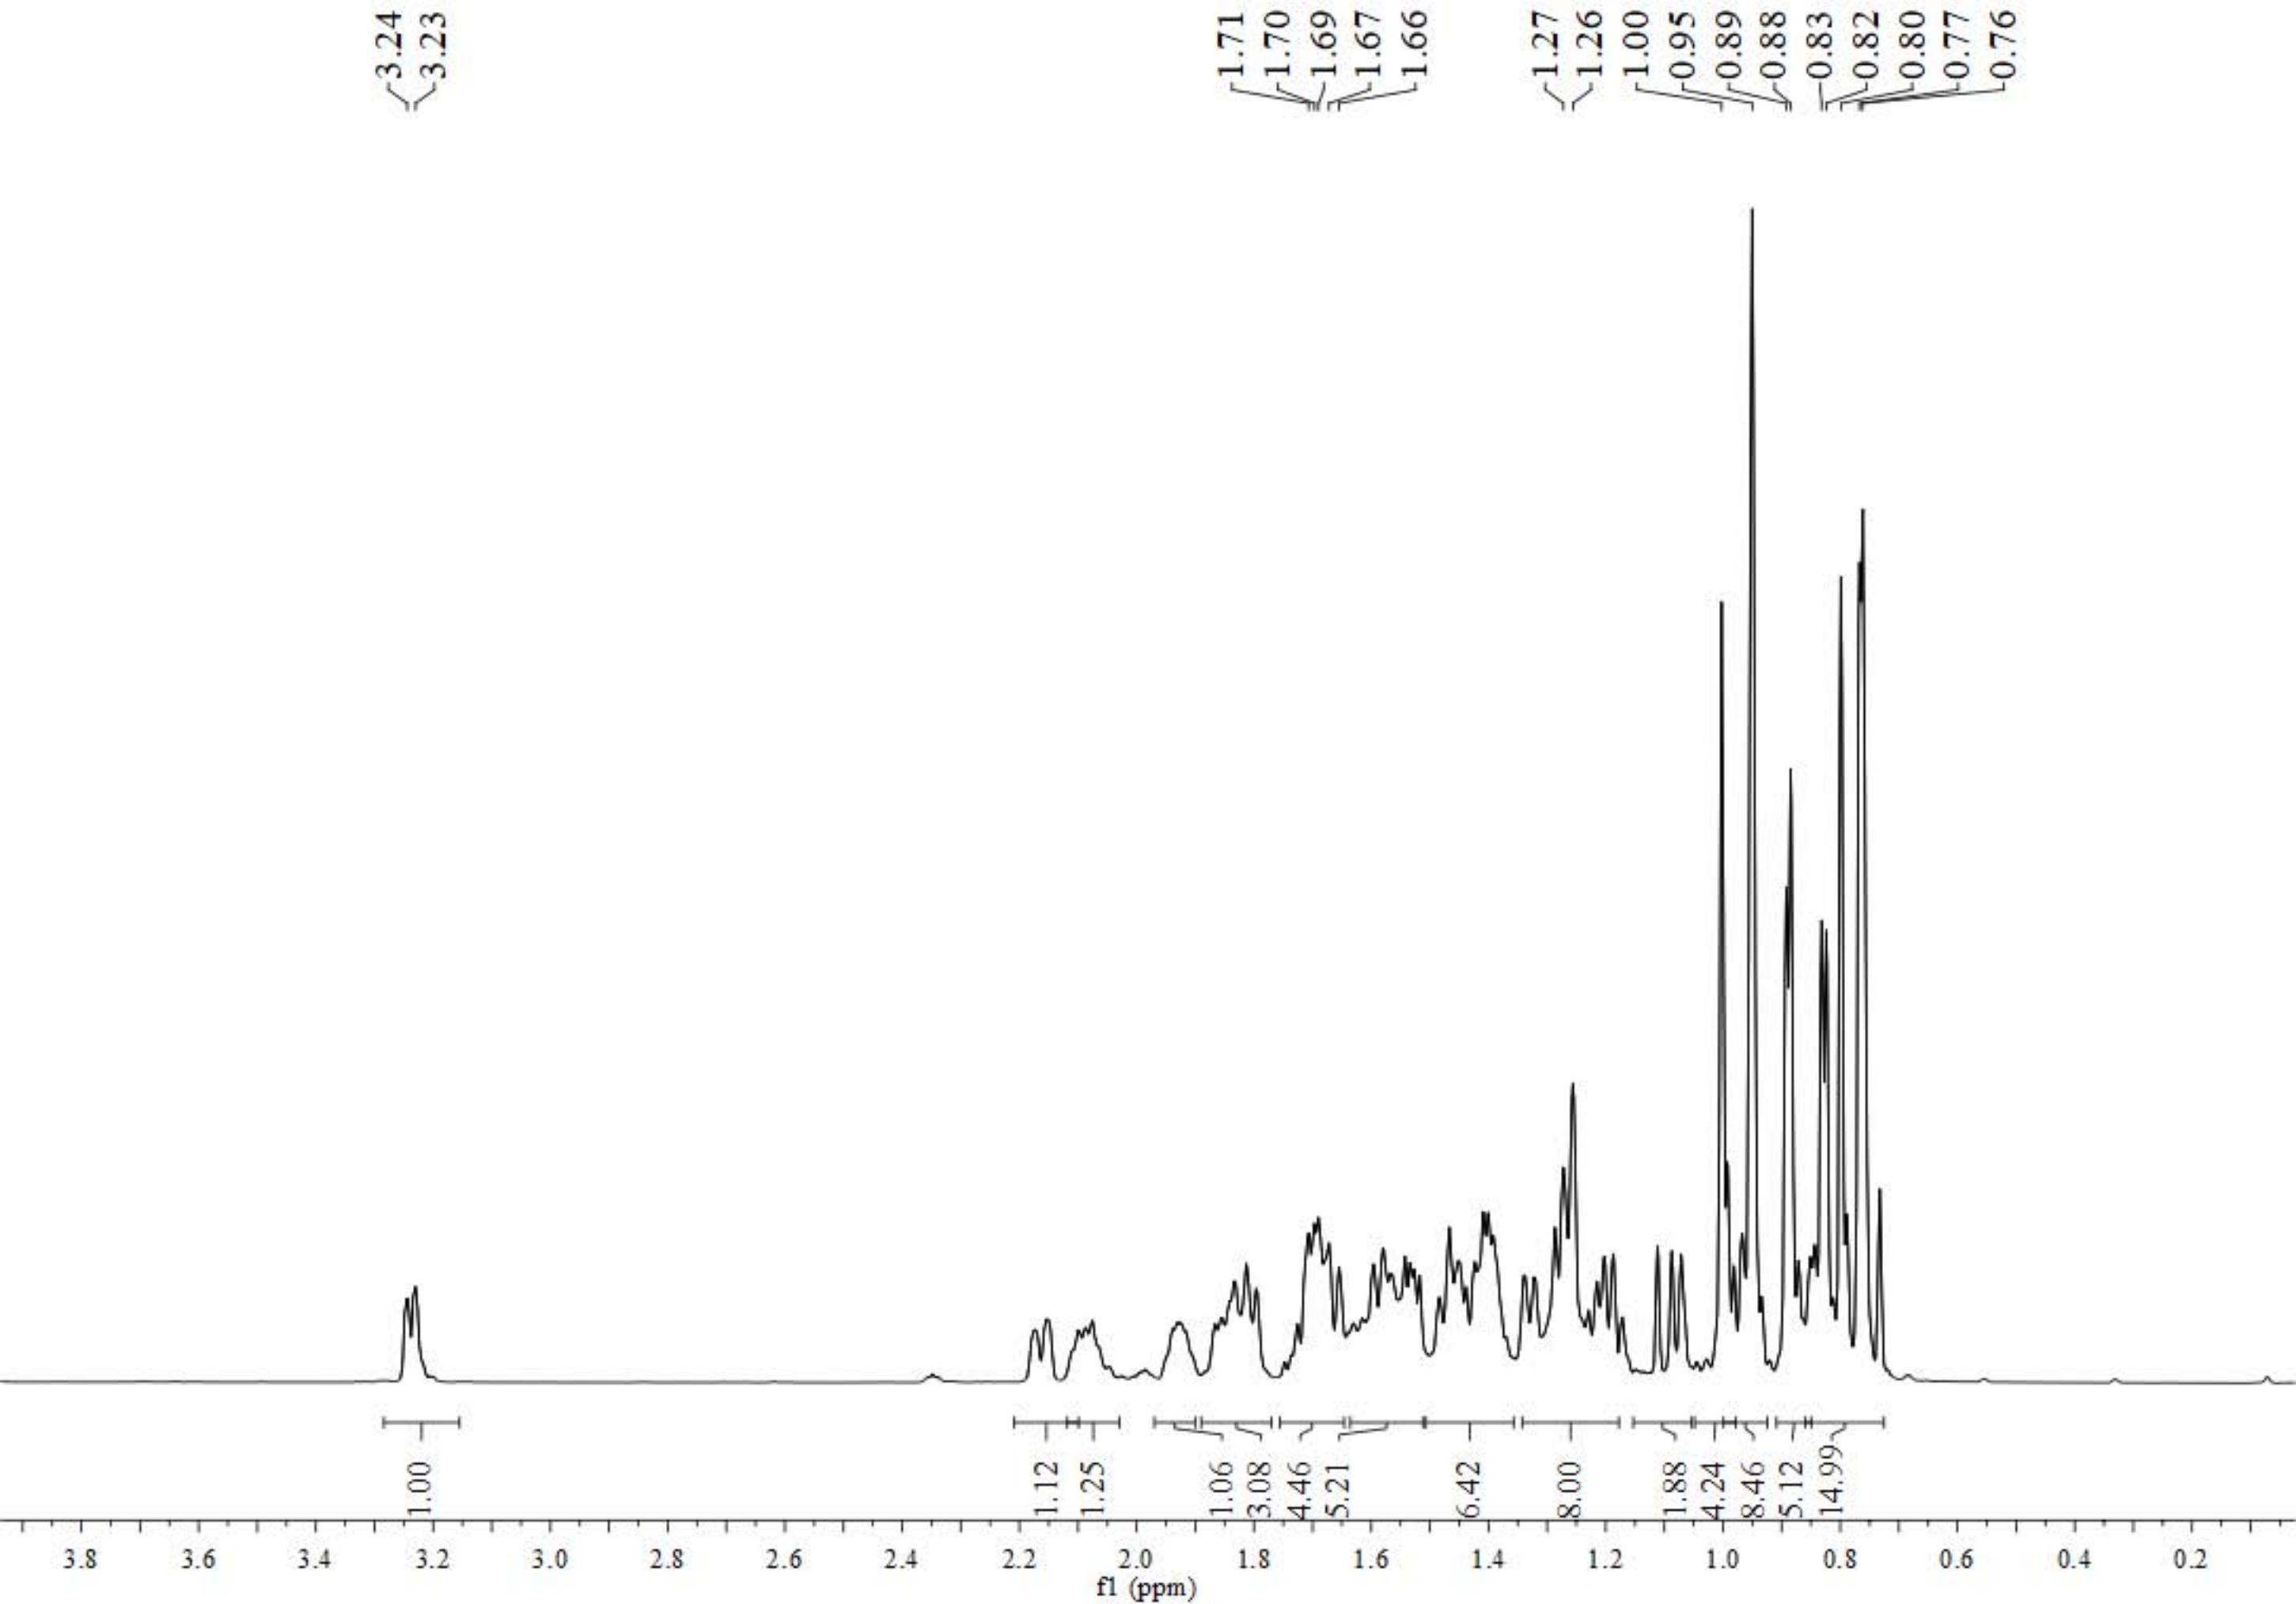

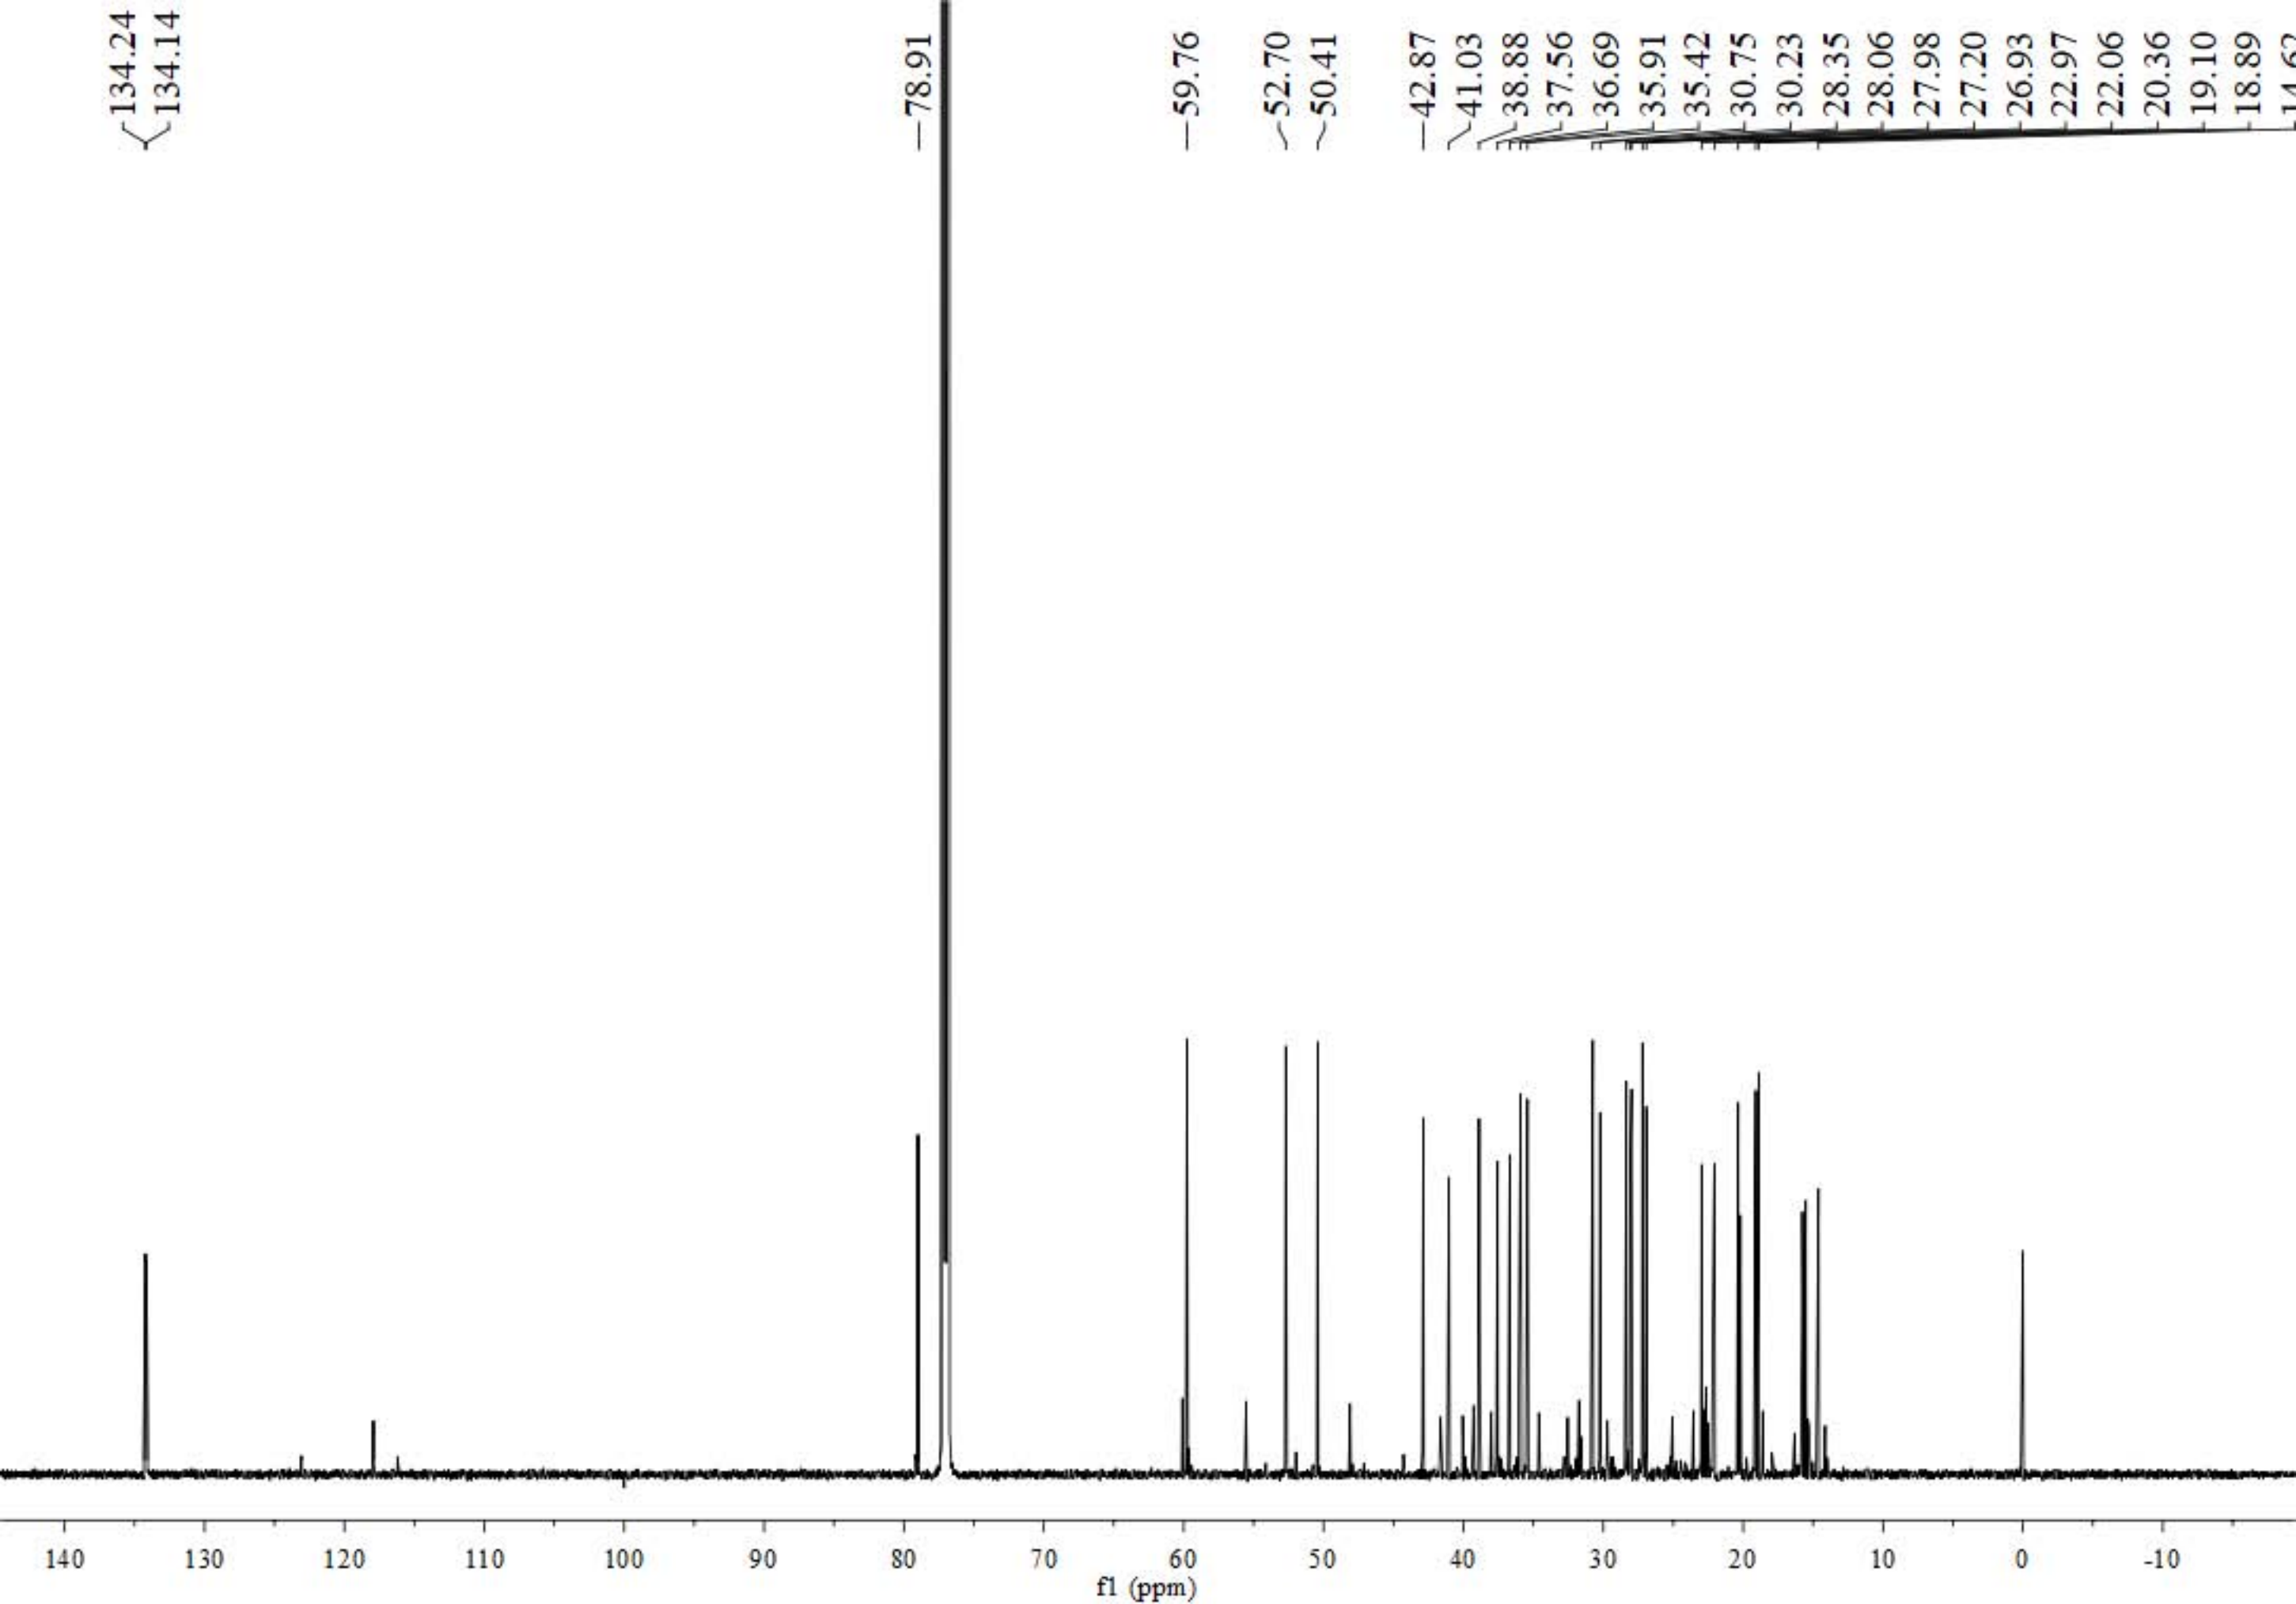

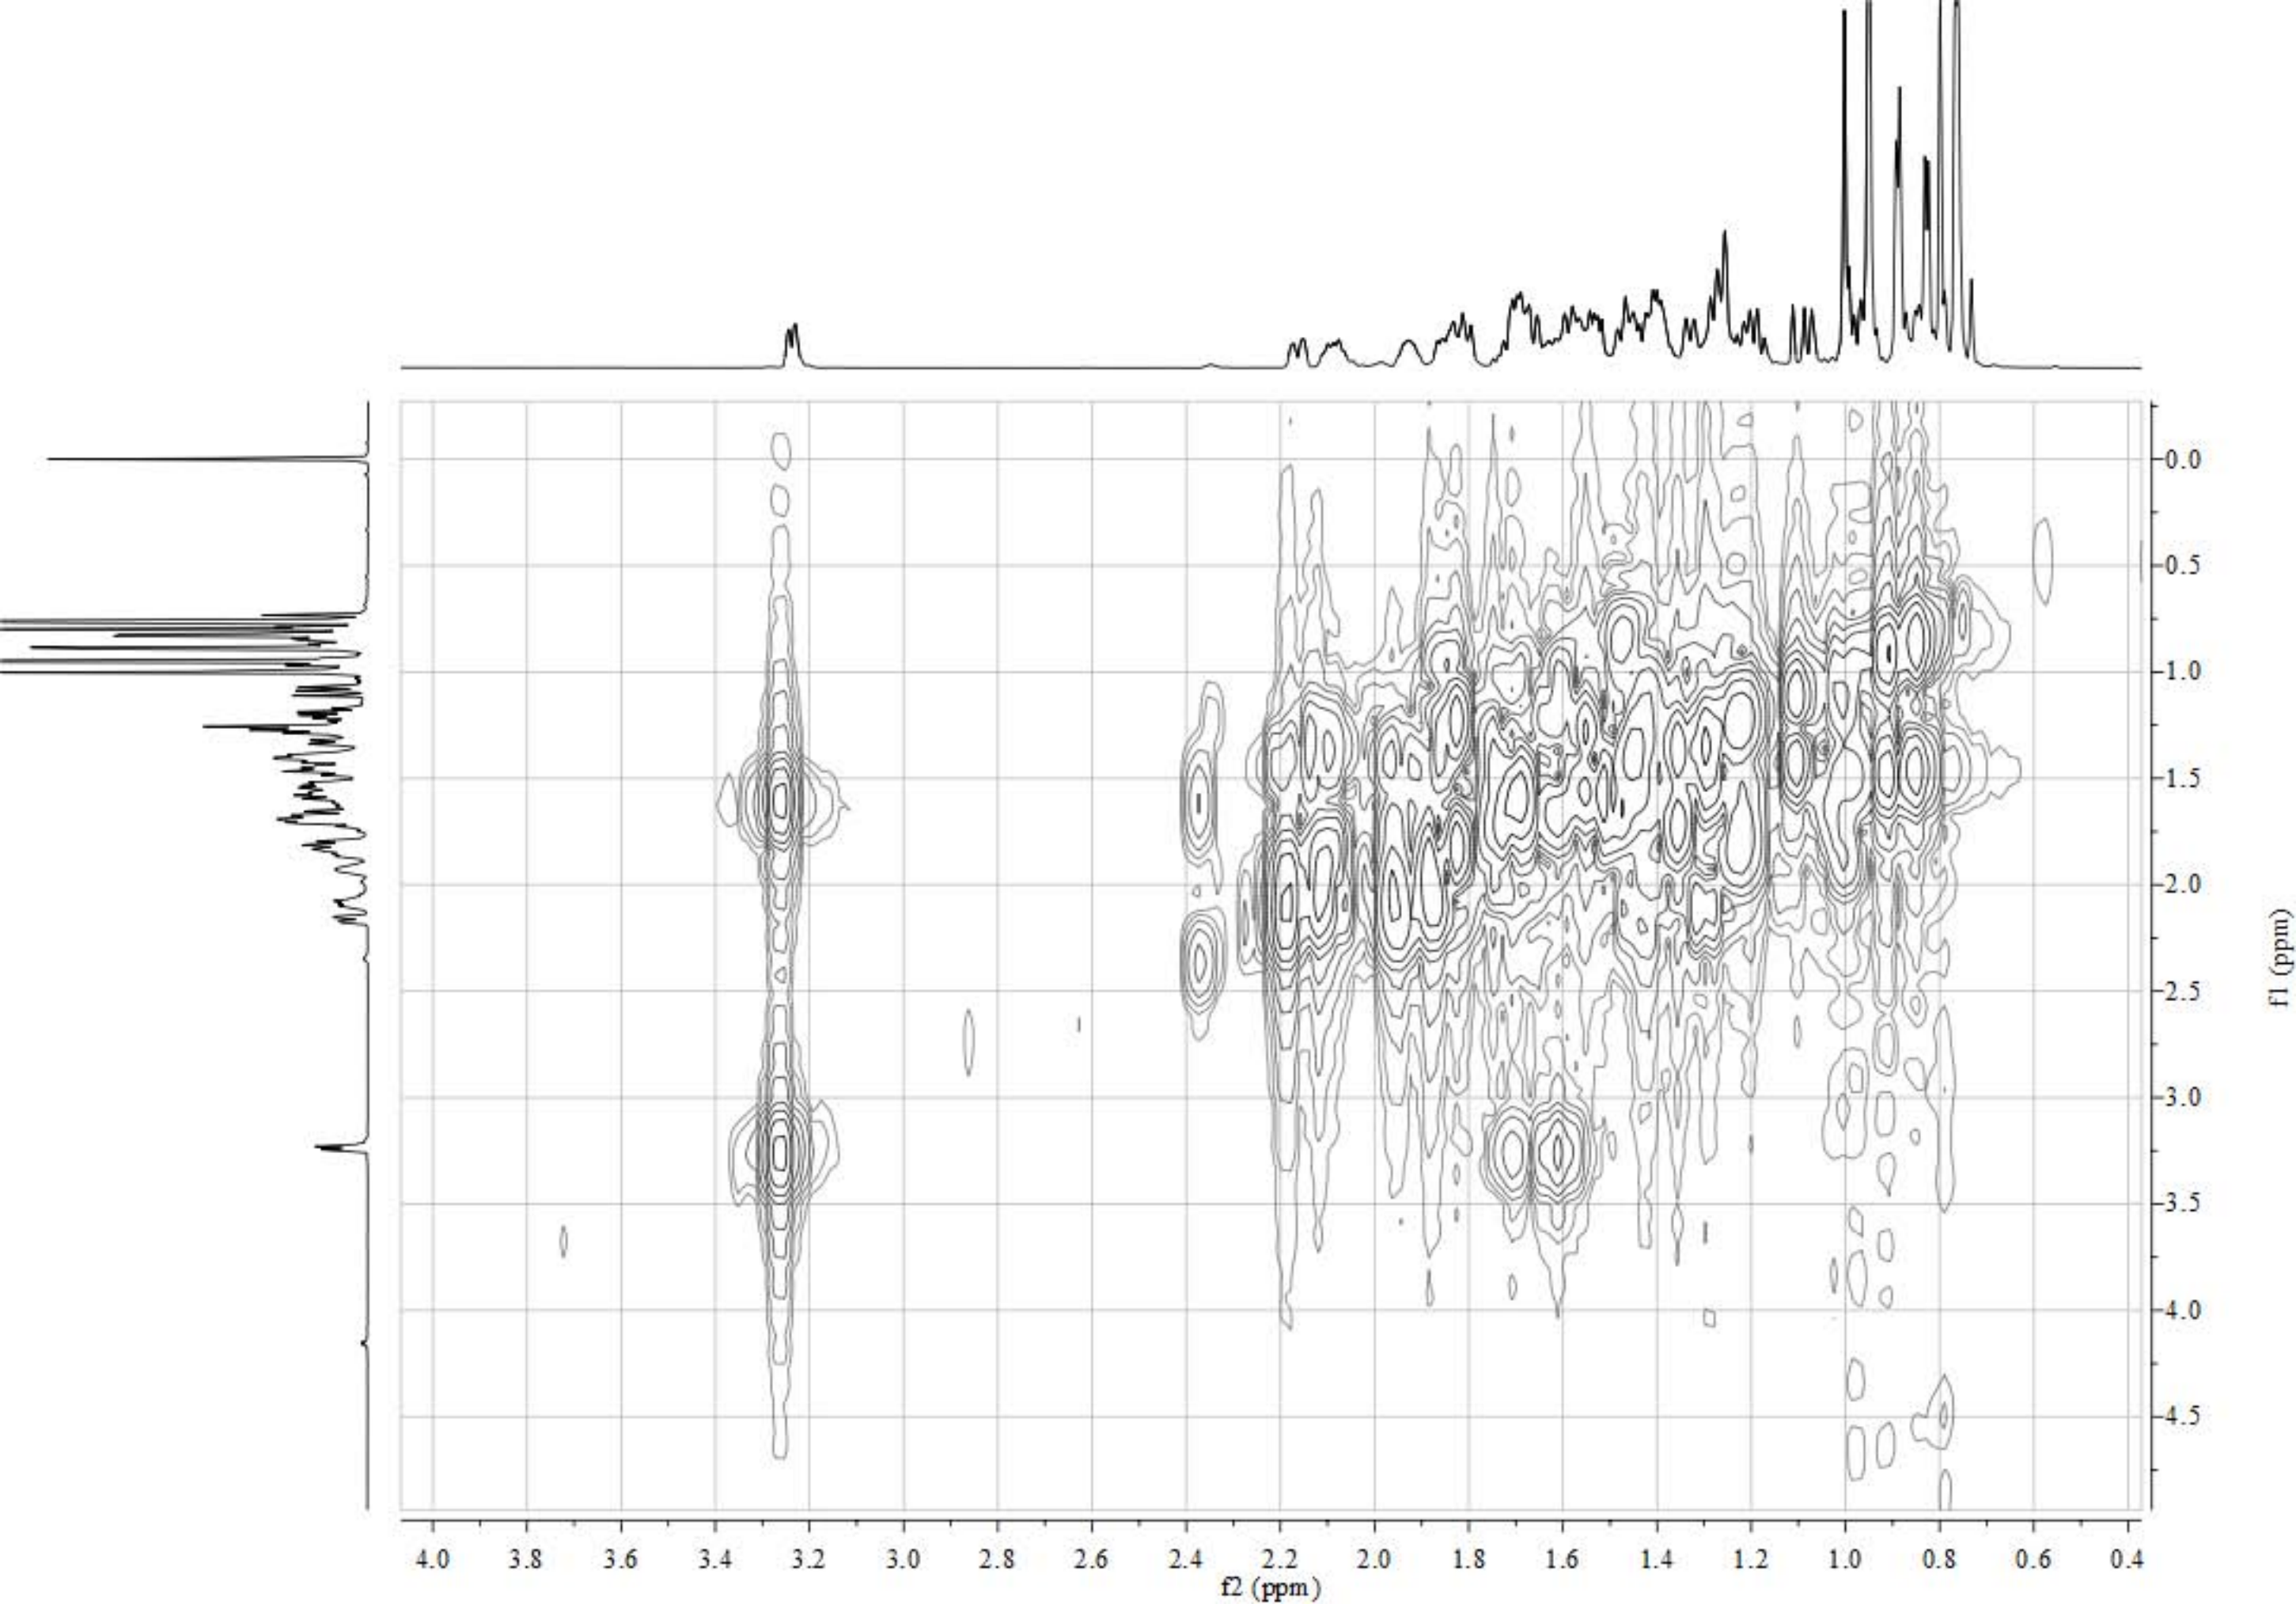



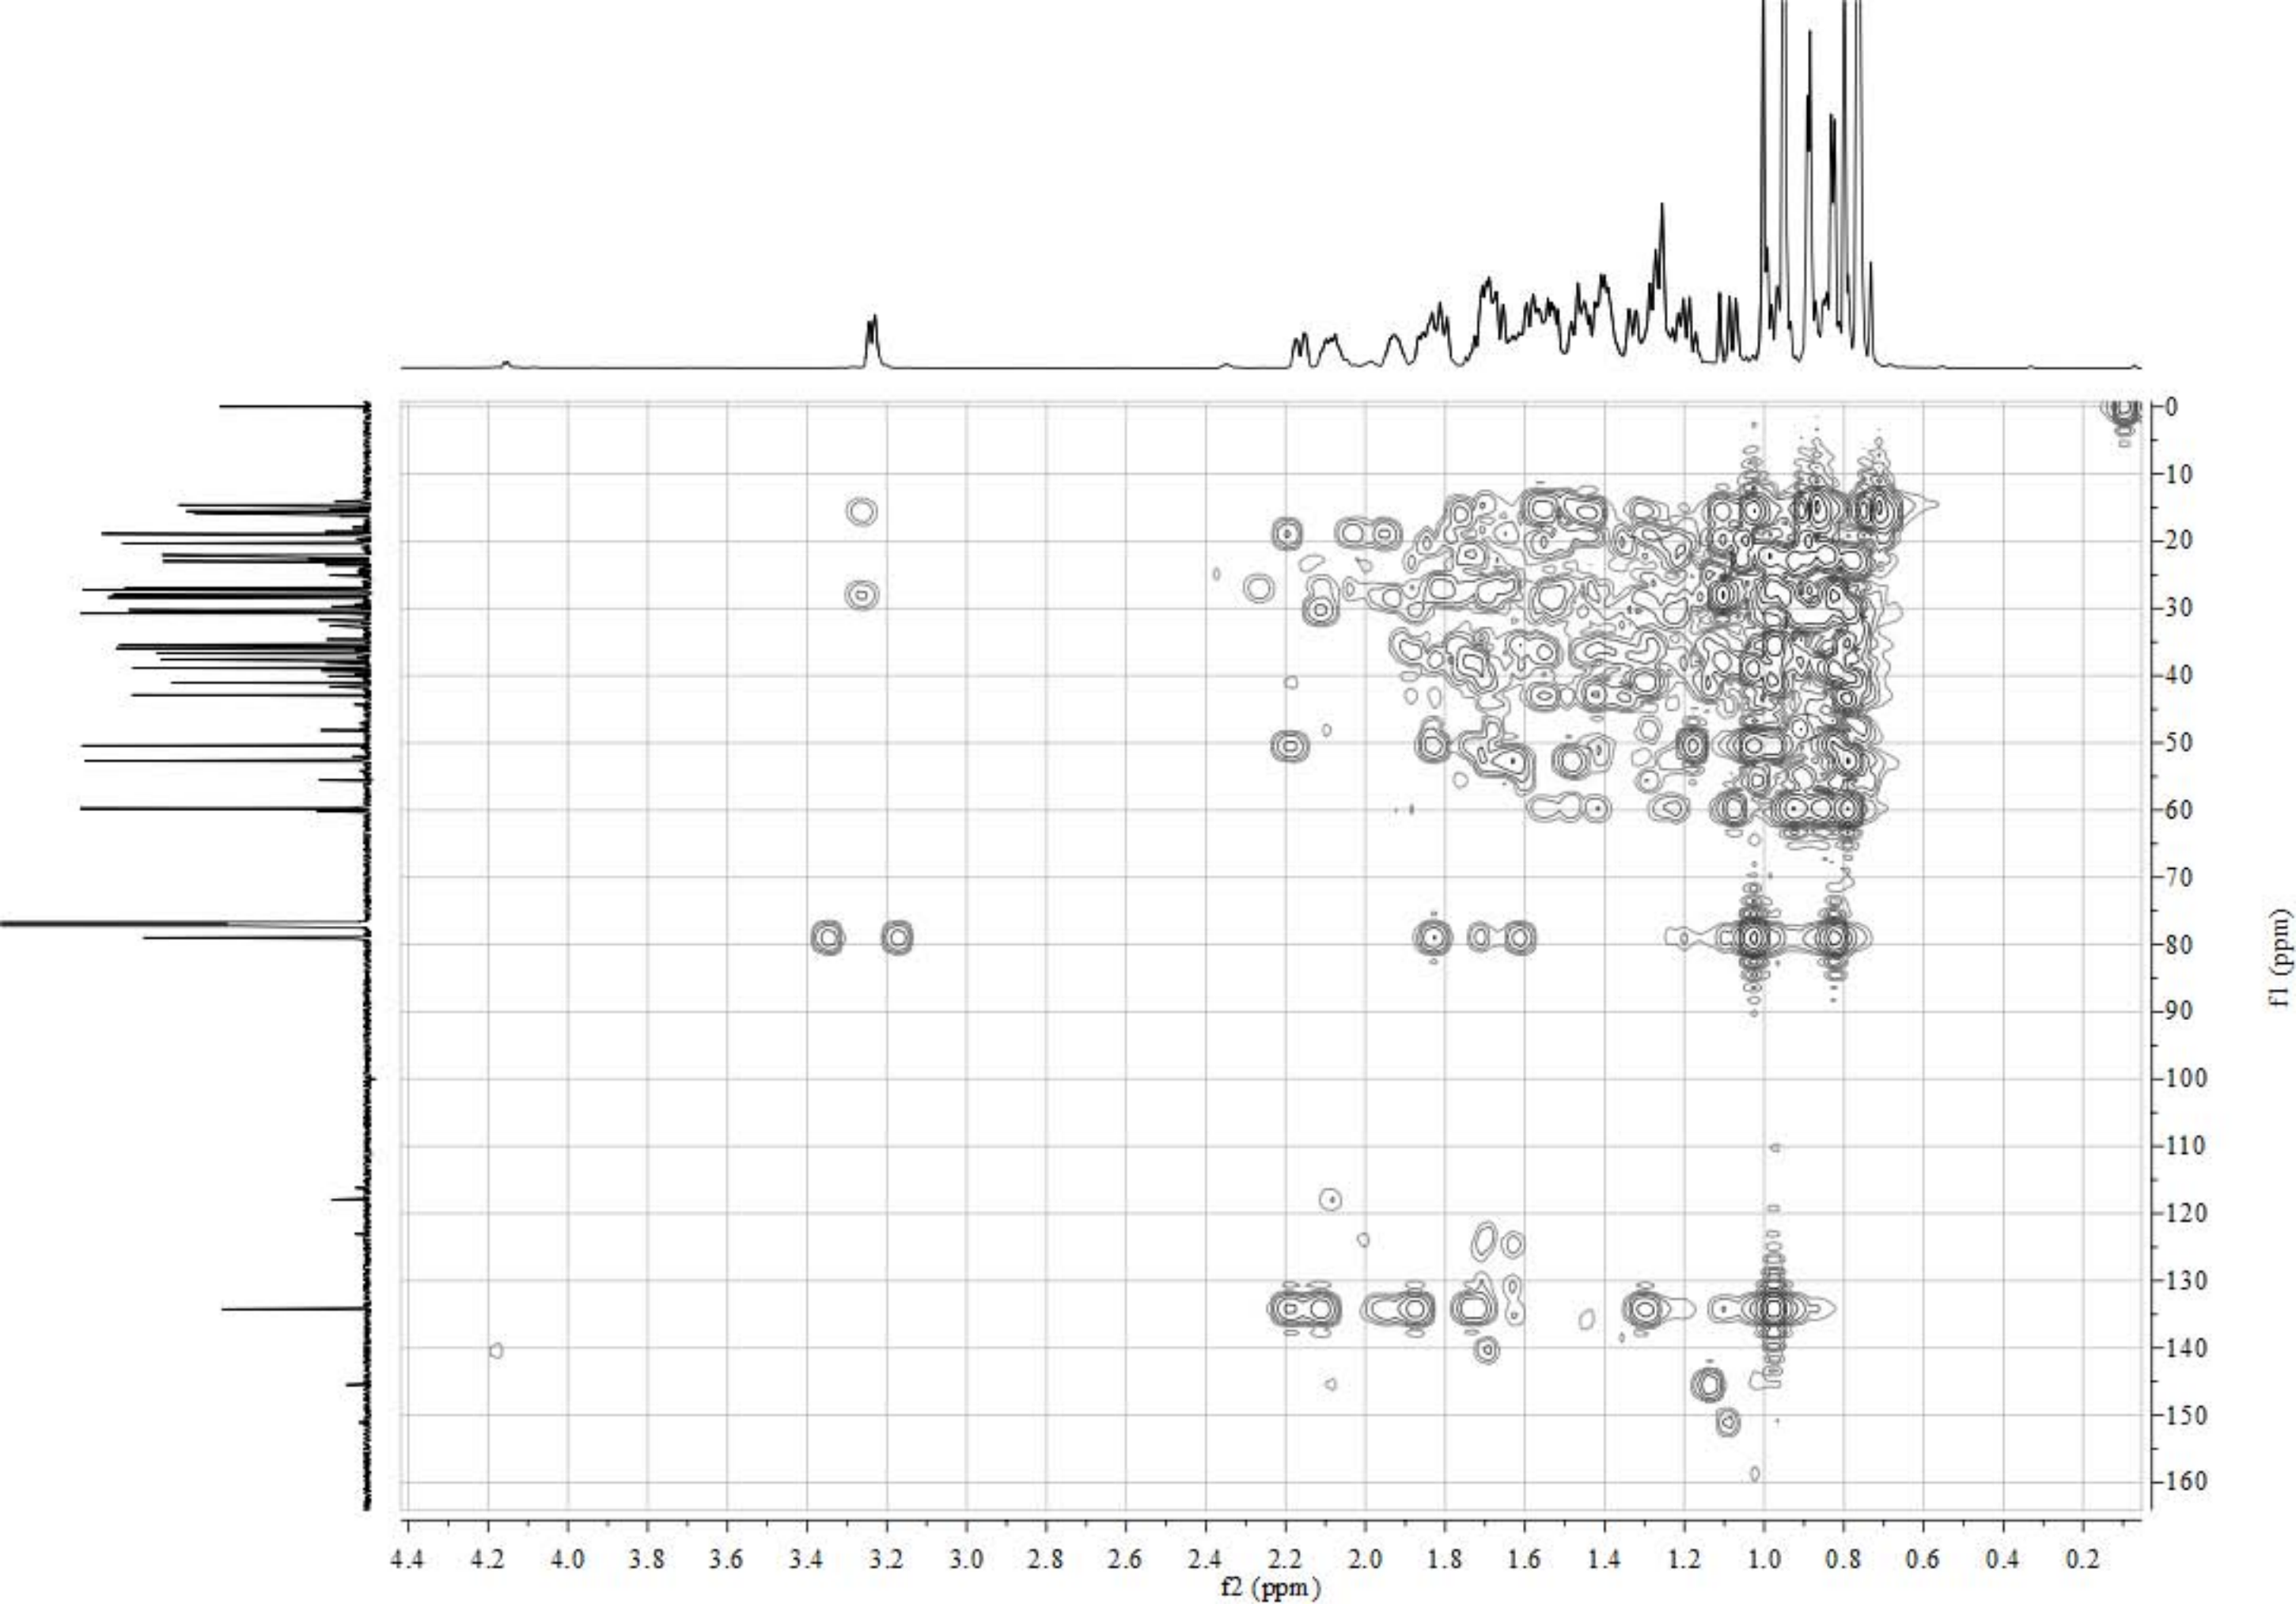

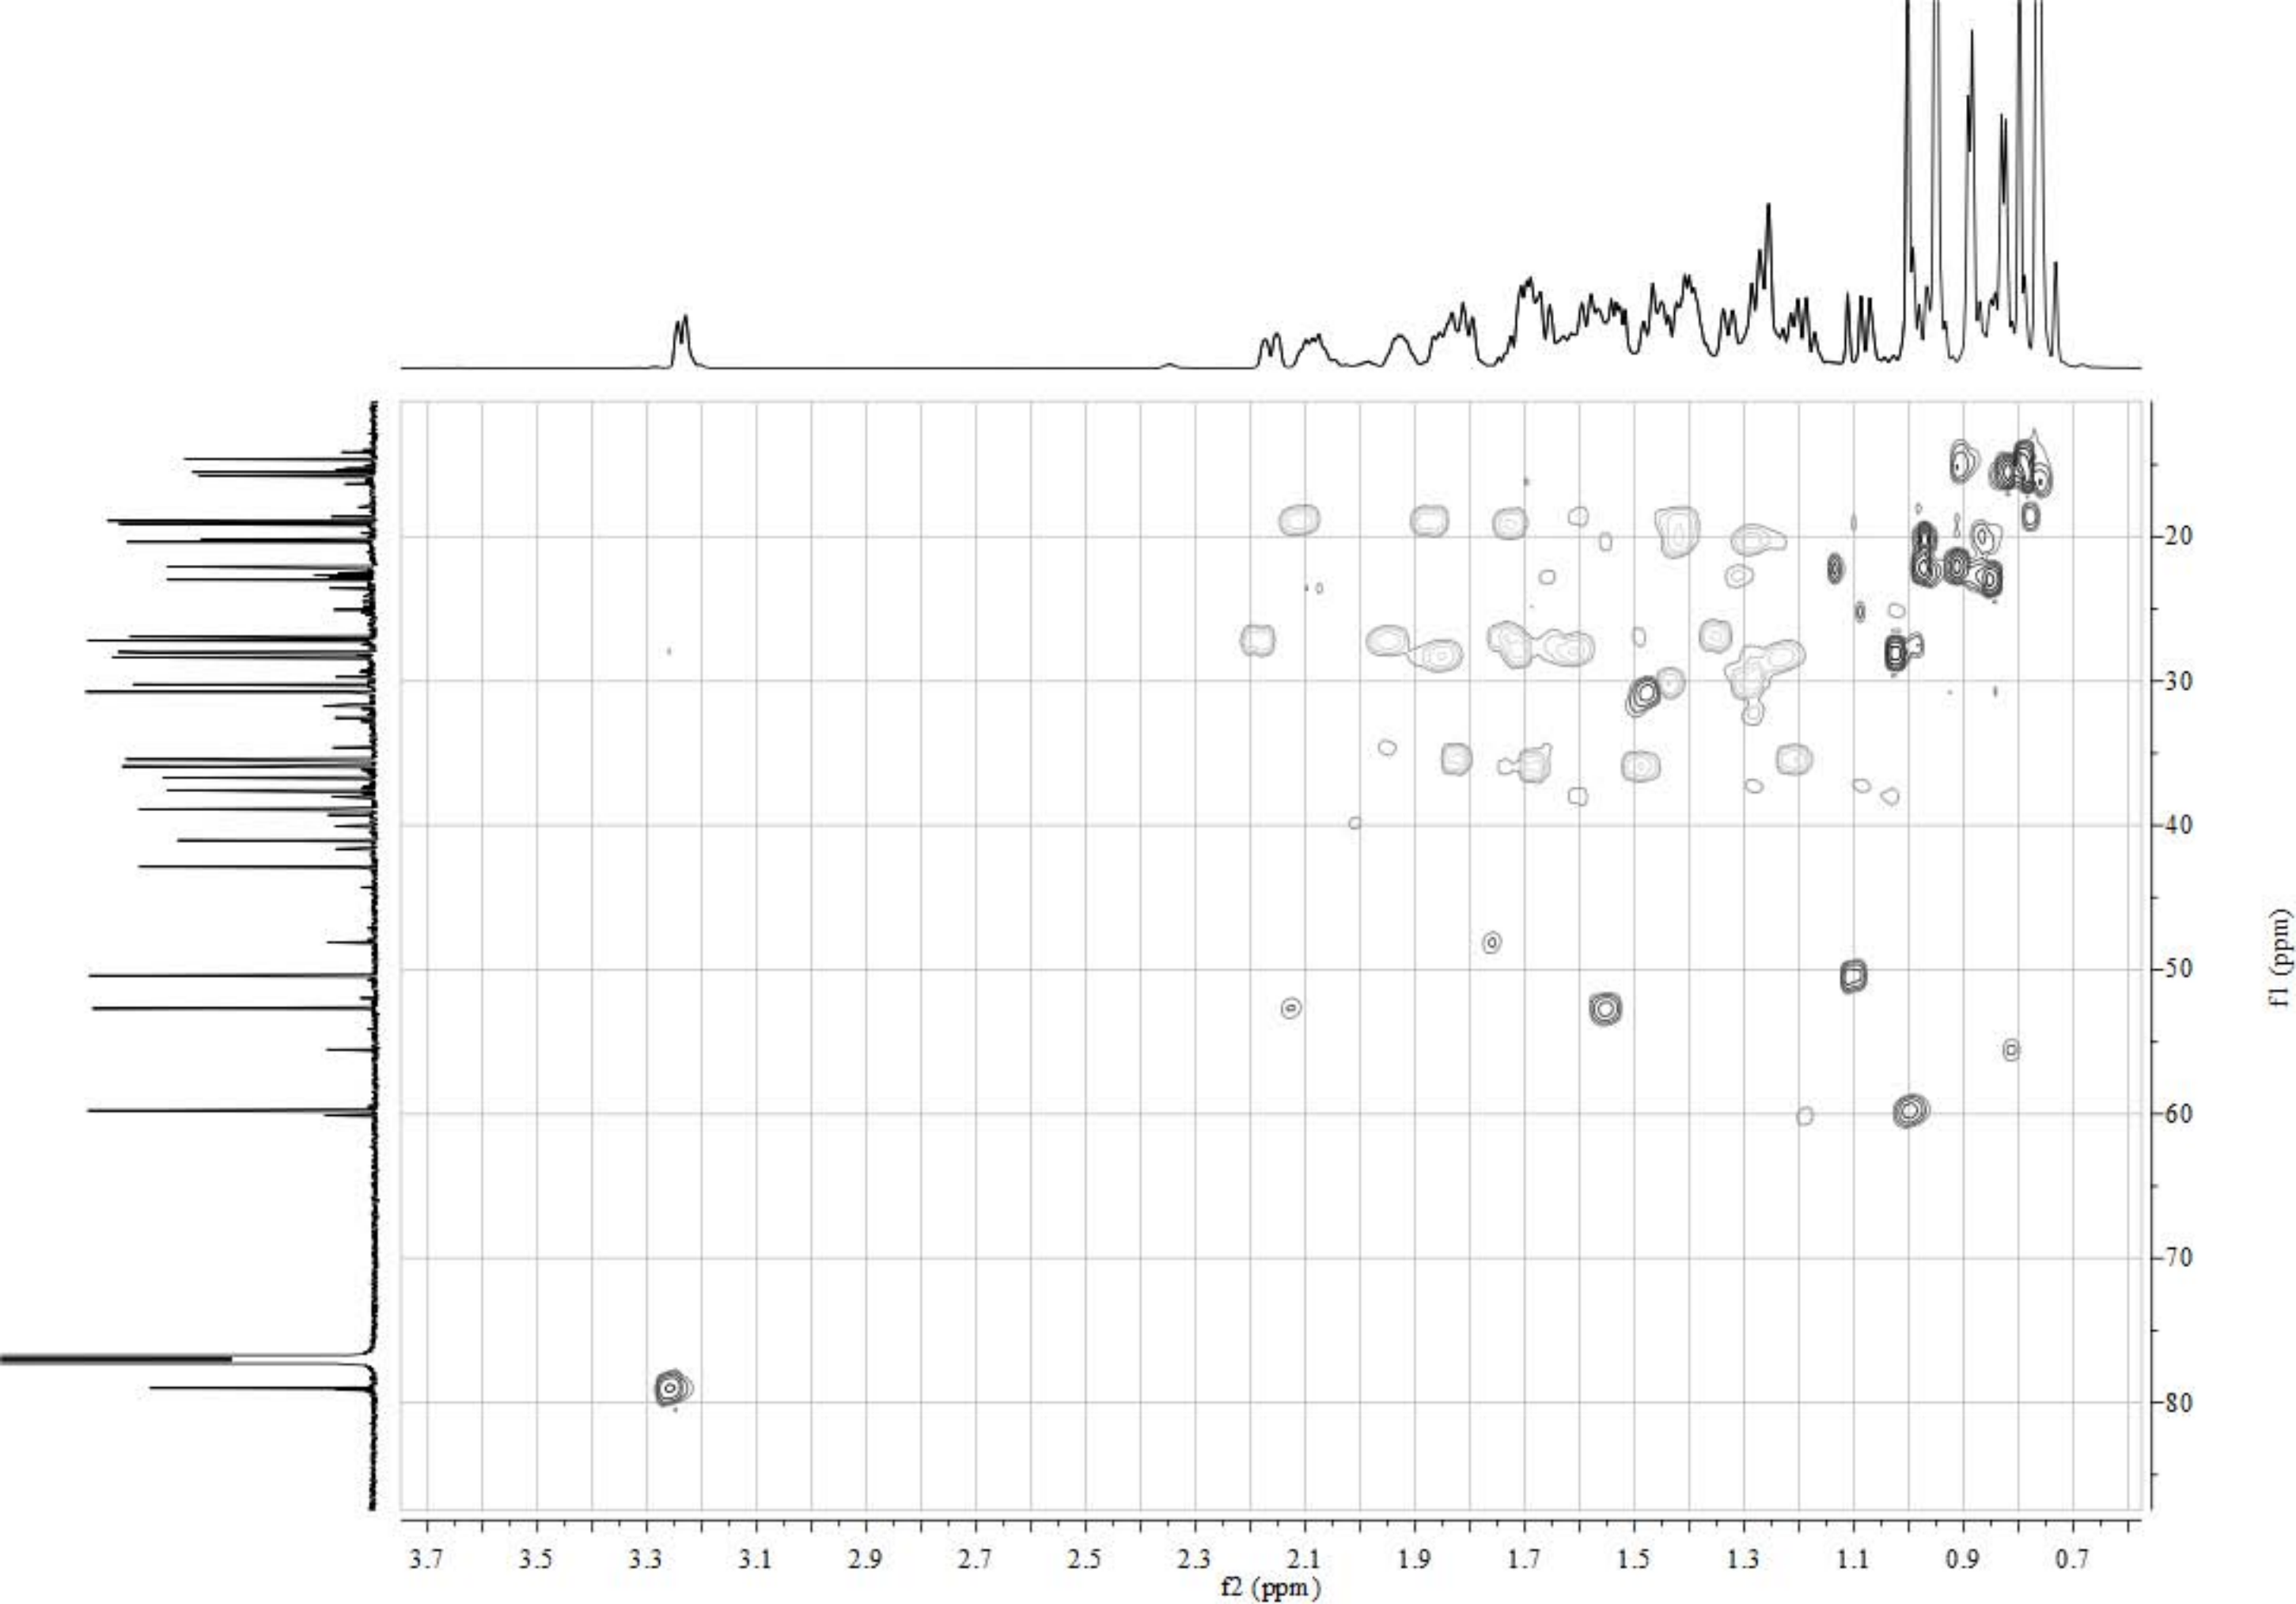

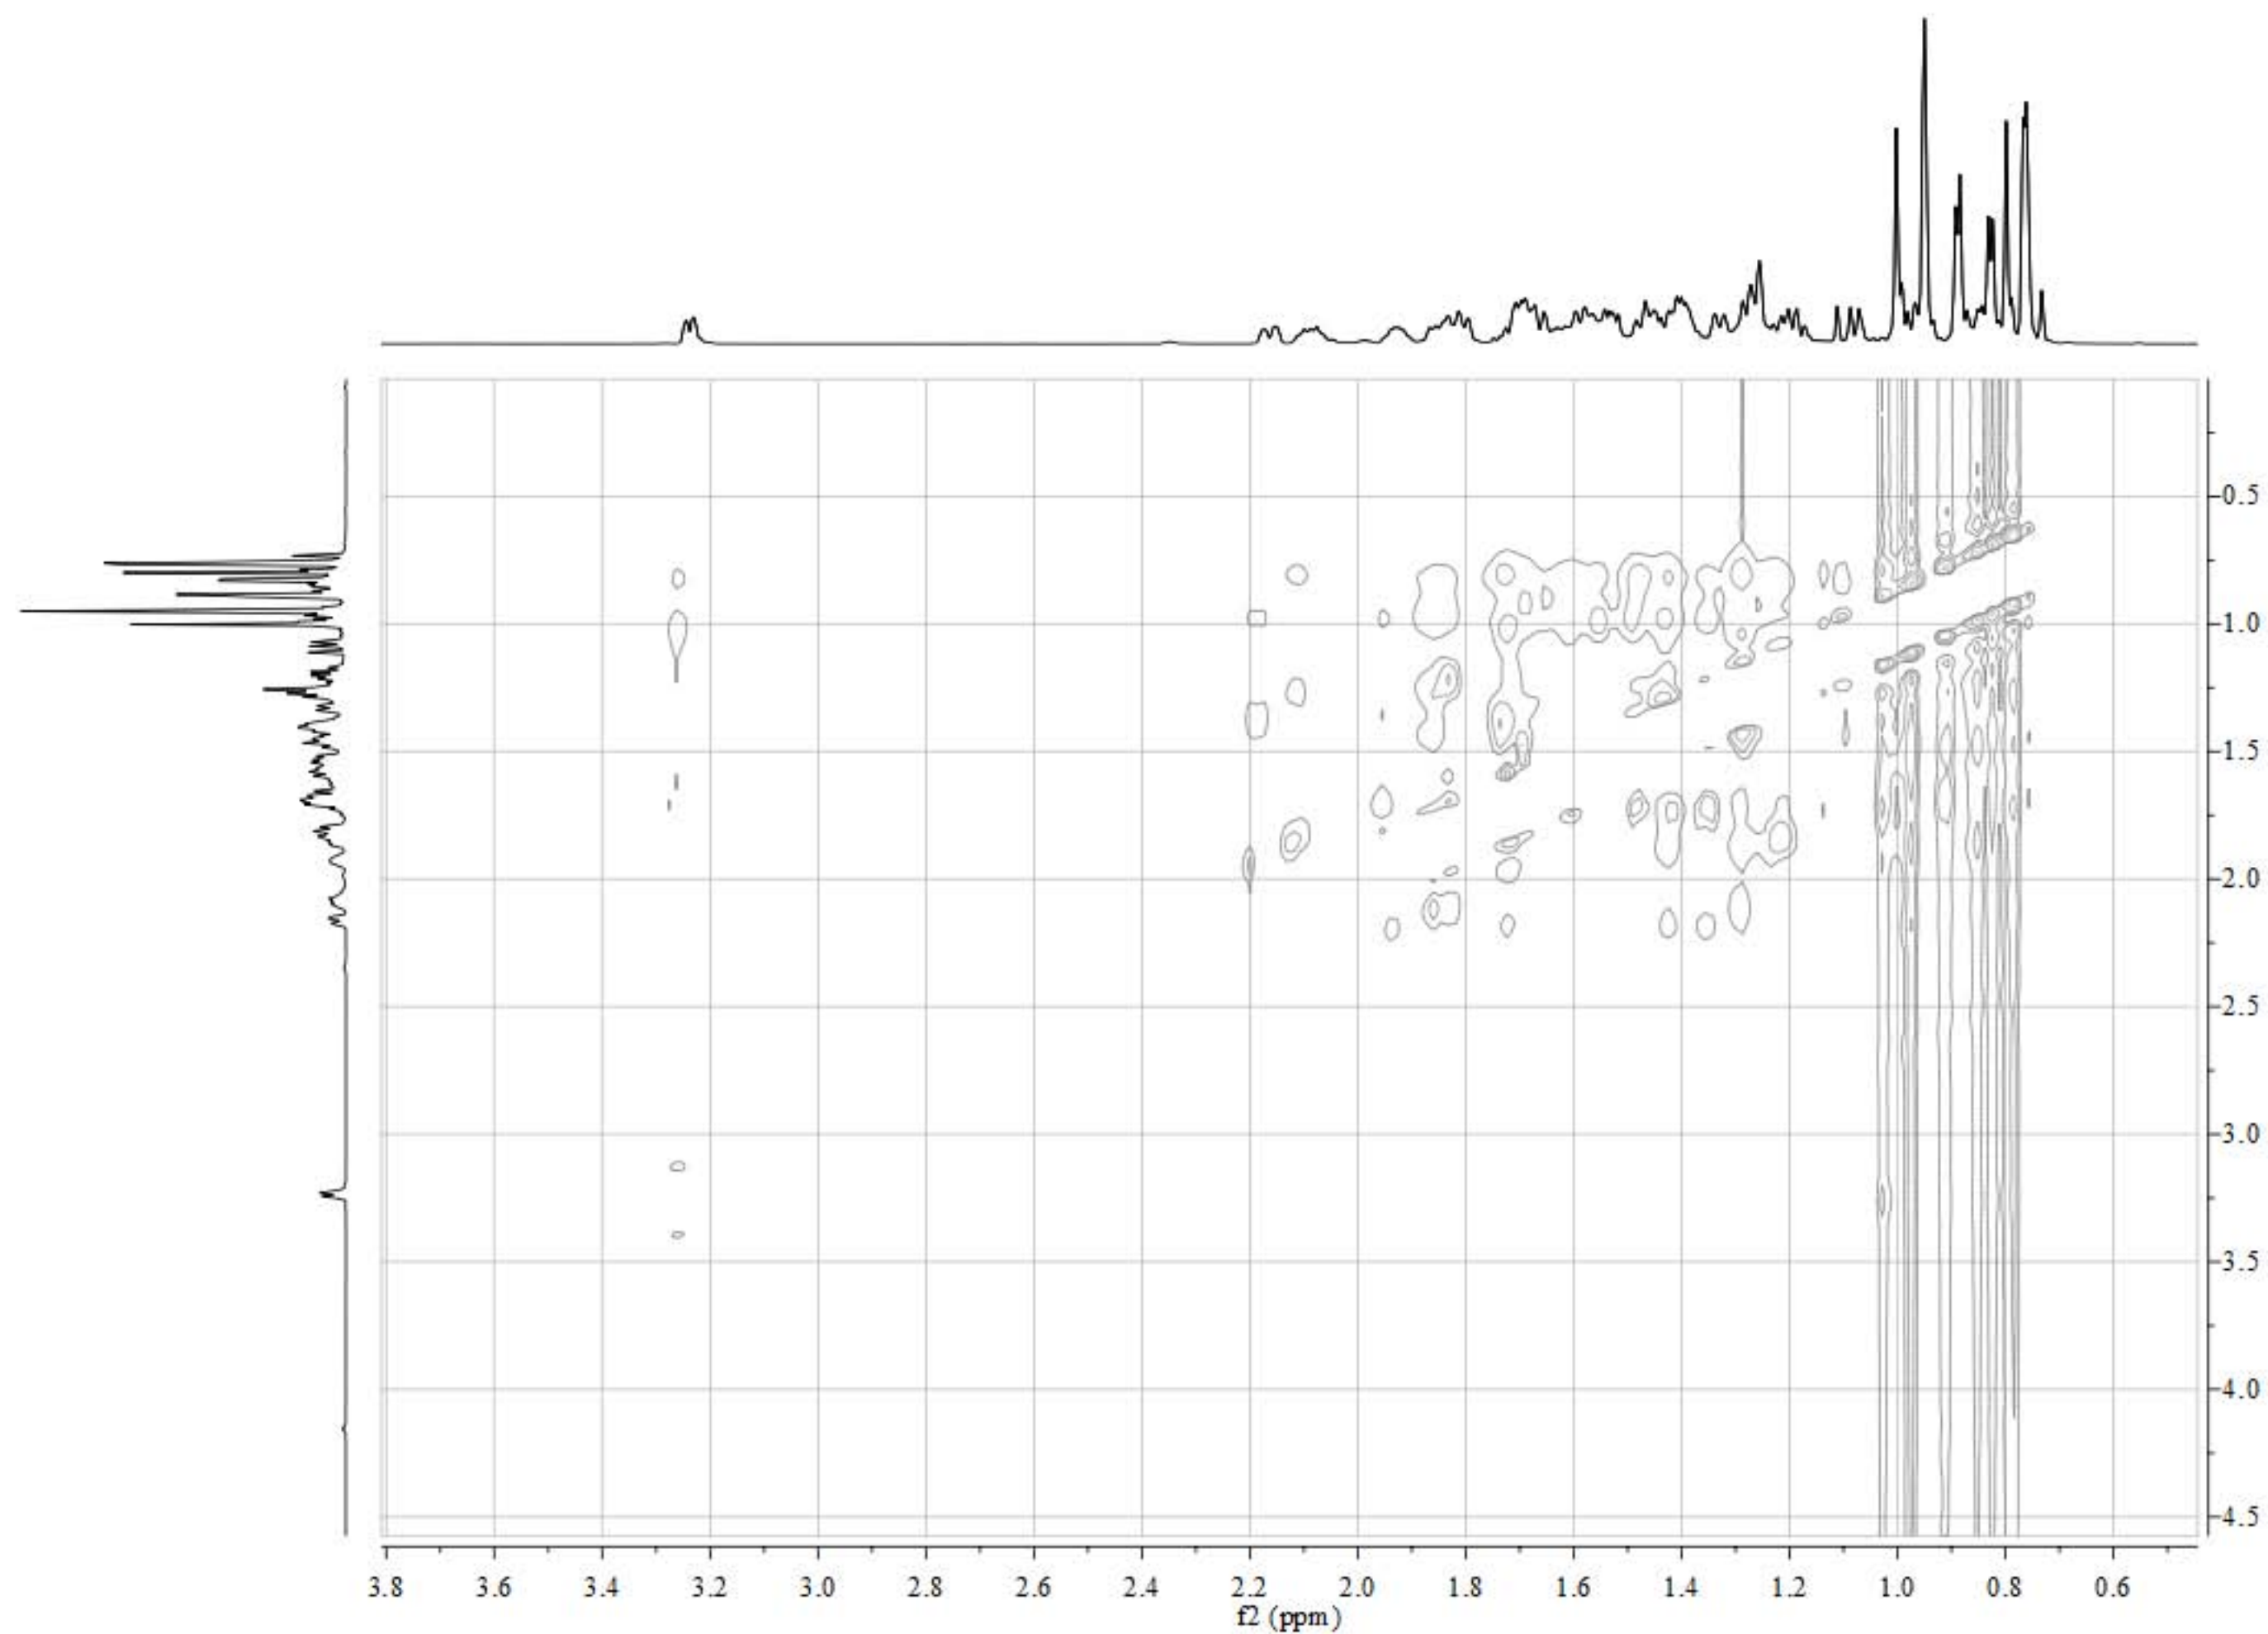

Supplement: pnas.2118709119.sd03.pdf [file pnas.2118709119.sd03.pdf]
